# Supplementary material for: Pooled endogenous protein tagging and recruitment for scalable discovery of effectors for induced proximity therapeutics
Source: Research Square preprint supplement (doi:10.21203/rs.3.rs-3161717/v1), 2023-09-13
Supplement: Supplementary file 1 [file 7bbd9813fe93b7ef727ed0aa.xlsx]

## Sheet: Table S1
Table S1. Ranked list of sgRNAs with most significant effects on mClover3 levels after induced proximity. sgRNA naming structure follows: transcript _ targeted intron # _ total # of introns _ sgRNA #.
sgRNA	Gene	logFC	PValue
ENST00000414423.9-6-13_194	WDR26	13.0601	0
ENST00000414423.9-6-13_131	WDR26	10.3953	0
ENST00000414423.9-6-13_78	WDR26	10.8369	0
ENST00000676185.1-2-11_273	ERCC8	10.6774	1.14057e-279
ENST00000296343.10-17-19_5	RUBCN	10.2291	2.01959e-277
ENST00000257118.5-11-13_92	PHC2	8.55695	1.69321e-247
ENST00000264033.6-2-15_350	CBL	8.30477	4.39264e-243
ENST00000261789.9-4-4_44	TM9SF1	8.74855	1.65812e-241
ENST00000301764.12-16-26_51	DDB1	8.38472	1.91293e-238
ENST00000235329.10-9-16_28	MFN2	8.30966	3.30275e-238
ENST00000394030.8-12-17_46	CBLB	8.11989	2.53191e-234
ENST00000478244.6-3-6_85	DCUN1D2	8.33723	9.10208e-232
ENST00000025008.10-16-21_210	RB1CC1	7.99831	3.47734e-225
ENST00000317506.8-2-13_1523	RANBP10	7.65415	6.18035e-219
ENST00000619920.4-8-11_154	PSMC3	7.82896	1.31089e-213
ENST00000247461.9-7-13_93	CANX	7.54573	2.70567e-210
ENST00000321394.12-7-11_22	TCP1	7.43269	3.48925e-209
ENST00000360184.10-30-77_6	DYNC1H1	7.67477	2.57345e-205
ENST00000251047.6-10-12_167	LMAN1	7.34856	5.92252e-204
ENST00000287598.11-3-22_20	BUB1B	7.36363	2.19209e-202
ENST00000321394.12-9-11_10	TCP1	7.43535	1.28673e-201
ENST00000234831.10-6-7_162	TMEM59	7.86831	2.07486e-197
ENST00000512805.6-2-7_53	RACK1	7.38202	1.41071e-194
ENST00000621676.5-14-15_62	VPS11	7.37145	2.41993e-194
ENST00000341068.8-25-46_1	ANAPC1	6.98063	1.91119e-190
ENST00000247461.9-8-13_3	CANX	7.07529	4.37334e-188
ENST00000375254.8-49-105_118	UBR4	7.24568	1.12855e-184
ENST00000394817.7-3-8_427	SIL1	6.92003	3.15589e-184
ENST00000374864.10-11-22_176	ITCH	6.86241	3.54682e-184
ENST00000274140.10-5-25_145	MARCHF6	6.87118	2.73112e-183
ENST00000292035.10-1-7_239	MED27	6.87005	1.68007e-182
ENST00000502399.7-15-17_34	MARK2	6.86434	1.9841e-181
ENST00000396703.6-2-4_13717	UBE2E2	7.00236	4.23421e-180
ENST00000375440.9-5-19_305	CUL4A	8.01833	3.98275e-179
ENST00000350302.8-1-8_172	FBXO25	6.79723	8.40893e-179
ENST00000343090.11-20-27_23	UBE4B	6.9574	1.26553e-178
ENST00000011619.6-2-13_1098	RANBP9	6.37966	1.65855e-176
ENST00000296343.10-14-19_7	RUBCN	6.94232	2.60601e-176
ENST00000358757.5-2-5_65	UBE2W	6.67849	3.38387e-173
ENST00000455511.7-5-10_9	ANAPC7	6.64802	9.10259e-173
ENST00000262294.12-4-23_17	TRIM37	6.65197	2.25649e-172
ENST00000389851.10-1-12_134	UVSSA	6.59367	4.72686e-172
ENST00000394222.8-5-9_26	ARL13B	6.54425	6.27556e-172
ENST00000377190.8-13-14_70	SYVN1	6.5853	7.58834e-171
ENST00000377560.9-47-75_29	HECTD4	6.46413	2.24356e-169
ENST00000254950.13-3-10_267	VPS4A	6.38299	3.32077e-168
ENST00000470229.6-3-13_56	NUB1	6.47083	6.1759e-168
ENST00000345496.7-3-5_413	UBE2G2	7.25895	2.17372e-167
ENST00000301764.12-25-26_24	DDB1	6.70366	1.14485e-166
ENST00000295888.9-47-64_21	WDFY3	6.60441	5.62237e-164
ENST00000348721.4-1-2_224	CISH	6.4562	6.59453e-163
ENST00000261497.9-10-12_50	USP22	6.34016	1.0007e-162
ENST00000374864.10-11-22_202	ITCH	6.54845	2.17021e-161
ENST00000355528.9-18-38_20	TBCD	6.27248	2.42121e-160
ENST00000545606.6-2-14_109	CAND1	6.40256	1.83823e-159
ENST00000361242.9-10-13_9	ATG9A	6.22912	1.92827e-159
ENST00000232978.13-14-15_23	NKTR	6.30916	6.56323e-158
ENST00000347063.9-7-8_56	RNF175	6.08922	7.64905e-158
ENST00000232978.13-15-15_87	NKTR	6.61781	4.03667e-157
ENST00000361189.7-3-8_111	PJA2	6.31997	6.59104e-157
ENST00000269397.9-3-4_318	CBX4	6.05405	2.02949e-156
ENST00000358015.8-4-9_235	RAD23B	6.09126	2.56848e-156
ENST00000545606.6-1-14_489	CAND1	6.6287	6.2416e-155
ENST00000377670.9-12-14_99	HIF3A	5.89664	1.40516e-154
ENST00000375254.8-44-105_27	UBR4	5.97613	1.62647e-151
ENST00000244061.6-1-5_207	RNF114	5.81572	8.93132e-151
ENST00000311635.12-6-8_73	FBXO31	6.54169	2.51882e-150
ENST00000315962.9-2-9_464	TRIM55	6.07632	9.03677e-150
ENST00000229268.13-8-19_70	USP5	5.75782	1.21956e-149
ENST00000262294.12-13-23_149	TRIM37	5.90326	2.79347e-149
ENST00000290649.10-7-13_48	AMFR	6.93831	7.42224e-149
ENST00000359154.7-2-22_1	WWP2	5.71375	3.40073e-148
ENST00000357244.7-15-19_6	RC3H2	5.65705	3.45712e-148
ENST00000170447.12-5-7_38	MKRN2	5.91247	1.80504e-147
ENST00000377264.8-15-40_8	ATG2A	5.71763	3.35073e-147
ENST00000261427.10-4-6_626	UBE2K	6.26108	1.80133e-145
ENST00000456430.6-1-14_323	CAND2	5.99513	2.09364e-145
ENST00000443617.7-9-76_46	HERC1	7.4796	1.66856e-144
ENST00000484457.6-2-14_2250	FBXL2	5.74296	1.29472e-143
ENST00000265981.7-4-4_84	RNF141	5.86541	1.33014e-143
ENST00000650932.1-6-15_59	UHRF1	5.73552	1.49983e-143
ENST00000382363.8-4-8_30	RNF215	5.64657	3.50374e-143
ENST00000544301.7-1-8_20	VIM	5.72432	7.49235e-143
NTC_77385	NA	5.73716	1.06786e-142
ENST00000648994.2-1-10_1851	GAN	5.93249	1.7984e-142
ENST00000311269.10-5-9_266	MARCHF10	5.68732	4.3339e-141
ENST00000375254.8-78-105_151	UBR4	6.50993	2.0728e-140
ENST00000264033.6-6-15_28	CBL	5.98233	4.23806e-140
ENST00000265981.7-1-4_96	RNF141	6.04382	3.77519e-139
ENST00000300935.8-2-7_3	RAB8A	5.73914	4.04048e-139
ENST00000398246.8-8-11_70	LONRF1	5.65283	4.77581e-139
ENST00000354911.9-1-13_3	WAC	5.73671	2.05407e-138
ENST00000356221.8-8-17_11	CDC16	5.54755	4.07061e-137
ENST00000246957.10-11-17_410	TRAP1	5.50724	5.12528e-136
ENST00000283351.10-4-28_25	TRAPPC8	5.46542	7.31527e-136
ENST00000376052.5-22-29_4	TPP2	5.51413	3.62486e-135
ENST00000579016.6-12-13_37	ENGASE	5.99912	3.64147e-135
ENST00000396703.6-1-4_211	UBE2E2	5.40423	2.35938e-134
ENST00000435532.7-19-28_13	NEDD4	5.63795	3.51953e-134
ENST00000379624.6-1-10_1263	BABAM2	5.49354	2.31981e-132
ENST00000270586.8-2-5_23	PSMB6	5.44127	2.02024e-131
ENST00000354449.7-2-17_294	ATG7	5.81967	2.85737e-131
ENST00000307720.4-6-9_69	PPID	5.38493	6.40985e-131
ENST00000286788.9-8-14_6	CCT8	5.41194	1.14315e-130
ENST00000454077.6-10-11_8	ATXN7L3	5.97807	2.5171e-130
ENST00000374749.8-3-19_215	CUL2	5.19771	3.17453e-130
ENST00000308696.11-3-23_5	PSMD1	5.56639	1.93809e-129
ENST00000579016.6-6-13_53	ENGASE	5.40662	2.29013e-129
ENST00000011619.6-10-13_10	RANBP9	5.32154	1.18516e-128
ENST00000582970.5-61-66_2	RNF213	6.37571	1.47628e-128
ENST00000356840.8-2-6_661	MYLIP	5.3544	8.93874e-128
ENST00000330817.11-6-8_71	ALG12	5.23209	9.45775e-128
ENST00000254950.13-8-10_31	VPS4A	5.39528	3.54913e-127
ENST00000649815.2-10-12_14	AKT1	5.22555	3.625e-127
ENST00000217244.9-1-11_61	CSNK2A1	5.33498	5.3732e-127
ENST00000262493.12-2-7_2980	GNAO1	5.78375	3.02586e-126
ENST00000269385.9-2-4_15	CBX8	5.08985	7.41551e-126
ENST00000226225.7-4-5_19	TNFAIP1	5.31881	9.7167e-126
ENST00000262139.10-1-12_27	WIPI1	5.15451	1.11011e-125
ENST00000648994.2-9-10_382	GAN	5.46912	1.20179e-125
ENST00000263464.9-2-7_23	BIRC3	6.20368	7.75957e-125
ENST00000382368.8-4-4_712	FBXL18	5.0462	9.18066e-125
ENST00000229758.8-2-4_26	FBXO5	5.54605	1.25175e-124
ENST00000336576.10-1-7_117	DNAJB2	5.3499	1.27196e-124
ENST00000290650.9-12-46_119	UBR1	5.26705	5.10536e-124
ENST00000262406.10-7-18_367	RGS9	5.31674	1.63007e-122
ENST00000265981.7-4-4_11	RNF141	4.99638	5.35279e-122
ENST00000444643.7-2-7_152	DNAJB12	5.7291	5.70021e-122
ENST00000261497.9-12-12_121	USP22	5.42182	1.27892e-121
ENST00000456430.6-2-14_20	CAND2	4.95941	1.13261e-120
ENST00000280700.10-5-11_57	NGLY1	5.37951	1.88874e-119
ENST00000262903.9-23-23_15	HACE1	5.14321	2.82655e-117
ENST00000276893.10-10-15_121	UHRF2	4.88091	3.5502e-117
ENST00000259512.9-7-7_211	DERL1	4.94591	3.11864e-116
ENST00000352689.11-15-17_30	MKLN1	5.08321	3.81513e-116
ENST00000377071.9-19-22_61	KDM2B	5.33098	2.88269e-115
ENST00000260947.9-1-10_581	BARD1	4.83246	6.66743e-114
ENST00000406438.5-1-1_438	SMCR8	5.10149	3.61812e-111
ENST00000370187.8-12-13_76	BTRC	4.6817	4.13513e-109
ENST00000290649.10-8-13_236	AMFR	4.97408	1.28404e-107
ENST00000545606.6-4-14_49	CAND1	5.40087	1.43749e-107
ENST00000646651.1-2-5_32	UBE2T	4.9149	4.58782e-107
ENST00000376395.9-2-10_47	UBQLN1	4.689	1.28432e-106
ENST00000394030.8-13-17_33	CBLB	5.51974	1.42209e-106
ENST00000404125.6-39-45_24	PSME4	4.99761	2.80062e-106
ENST00000359933.6-38-41_12	ATG2B	5.02773	5.936e-106
ENST00000651528.2-27-41_4	DEPDC5	4.72533	2.36095e-105
ENST00000319394.8-11-14_77	WDTC1	6.82564	2.47118e-105
ENST00000358465.7-5-19_52	TRIM33	4.49993	3.04055e-105
ENST00000335877.11-6-6_65	PSMF1	4.82649	1.01412e-104
ENST00000359568.10-10-46_29	PCNT	4.55533	4.46455e-104
ENST00000361367.7-18-24_44	CTR9	4.66225	1.15355e-102
ENST00000356286.10-2-11_317	RBCK1	4.80737	2.58593e-102
ENST00000314355.7-1-2_155	CKS2	5.02805	1.17924e-101
ENST00000352689.11-15-17_206	MKLN1	4.72323	1.54328e-101
ENST00000206595.11-12-13_68	G2E3	4.79118	4.07401e-101
ENST00000356638.8-17-23_43	GANAB	4.85612	6.97015e-101
ENST00000517970.6-2-22_2	WWP1	4.45995	1.69381e-100
ENST00000319715.10-14-17_100	RBBP6	4.66419	4.71159e-100
ENST00000307142.9-2-4_17	SYNPO2	4.76874	6.91646e-100
ENST00000252108.8-9-18_37	UBE4A	4.77984	2.70468e-99
ENST00000370187.8-9-13_112	BTRC	4.79313	3.42429e-99
ENST00000290649.10-13-13_18	AMFR	4.81113	3.89255e-99
ENST00000360184.10-42-77_82	DYNC1H1	4.61585	1.15278e-98
ENST00000215730.12-2-4_213	SNAP29	4.43743	1.16432e-98
ENST00000343090.11-20-27_62	UBE4B	4.48375	4.43073e-98
ENST00000361367.7-22-24_16	CTR9	4.51159	8.55988e-98
ENST00000262493.12-4-7_119	GNAO1	4.92778	1.32543e-97
ENST00000262370.12-13-16_109	MGRN1	4.65925	3.38583e-97
ENST00000299413.7-4-4_1299	TRIM44	4.36137	3.4361e-97
ENST00000517970.6-22-22_179	WWP1	4.93557	4.79233e-96
ENST00000293883.9-8-8_6	WDR24	4.23383	1.1518e-95
ENST00000295888.9-11-64_62	WDFY3	4.77802	1.15645e-95
ENST00000260247.10-1-7_133	DCUN1D5	4.37599	5.6164e-95
ENST00000322244.10-15-32_9	UBA6	8.71395	7.75375e-95
ENST00000247178.6-2-9_89	ATG14	6.86438	1.66528e-94
ENST00000357244.7-8-19_342	RC3H2	4.5827	5.60479e-94
ENST00000359154.7-11-22_21	WWP2	4.99651	4.69484e-93
ENST00000179259.6-1-5_248	TIGAR	4.34634	2.10908e-92
ENST00000399598.7-7-7_18	UBXN2B	4.34327	1.12852e-91
ENST00000442697.7-2-7_53	DNAJB14	4.15523	1.56894e-91
ENST00000300935.8-2-7_130	RAB8A	4.25225	1.67576e-91
ENST00000221265.8-1-13_54	PAF1	7.74685	5.80754e-91
ENST00000470161.6-2-7_124	PCGF3	4.82332	6.51409e-91
ENST00000399464.7-14-28_15	NEURL4	4.30144	1.29998e-90
ENST00000262394.7-8-8_26	WSB1	4.27218	8.50996e-90
ENST00000394420.9-1-13_121	RSPRY1	4.03207	6.15195e-89
ENST00000674063.1-20-21_5	PIK3CB	4.6043	9.49943e-89
ENST00000590099.6-3-10_14	BECN1	4.45066	1.8211e-88
ENST00000356638.8-4-23_109	GANAB	4.80463	3.02731e-88
ENST00000298068.10-8-20_7	HECTD2	7.18092	3.51748e-88
ENST00000359154.7-2-22_33	WWP2	4.20334	3.68391e-88
ENST00000309033.5-5-5_291	UBXN2A	4.19219	5.44532e-88
ENST00000003084.11-16-26_9	CFTR	4.4826	1.72466e-87
ENST00000622495.5-7-11_184	FBXO21	4.43777	1.61125e-86
ENST00000320027.10-1-17_203	HSPH1	4.31574	2.63309e-86
ENST00000395544.9-19-26_17	ULK2	4.05629	2.68185e-86
ENST00000675855.1-11-14_9	PEX5	4.03447	3.59977e-86
ENST00000424310.7-5-9_55	RNF145	4.18799	4.65101e-86
ENST00000287777.5-2-5_37	KLHL40	8.71291	1.19711e-85
ENST00000259963.4-4-4_42	FAM8A1	4.07566	2.24904e-85
ENST00000455511.7-10-10_134	ANAPC7	4.36056	1.14761e-84
ENST00000309366.9-2-4_20	FKBP2	4.16802	5.78351e-84
ENST00000343526.9-5-18_111	TRIM24	7.65158	2.96137e-83
ENST00000299563.5-4-5_351	RNF169	4.01166	3.29875e-83
ENST00000379540.8-18-23_15	NFX1	4.50649	5.07741e-83
ENST00000642610.2-5-15_11	TBCE	4.01202	8.45115e-83
ENST00000361756.8-5-8_8	RNF121	4.02834	8.95442e-83
ENST00000255977.7-2-7_378	MKRN1	4.56389	1.02042e-82
ENST00000361756.8-8-8_41	RNF121	6.40795	1.19001e-82
ENST00000295688.8-6-13_20	CCT3	4.43407	1.54604e-82
ENST00000379263.8-11-16_2	DNAJC2	7.66562	3.69875e-82
ENST00000432825.7-9-9_42	FBXO10	6.62142	4.81846e-82
ENST00000262394.7-8-8_15	WSB1	4.31769	6.28308e-82
ENST00000647358.2-4-9_49	CBLC	4.65499	6.63367e-82
ENST00000011619.6-6-13_87	RANBP9	4.1695	4.58185e-81
ENST00000342494.8-15-25_14	UBE3B	6.36108	6.0059e-80
ENST00000591916.7-1-6_30	PTGES3L	4.32075	2.05612e-79
ENST00000317991.9-13-19_33	GRAMD1A	4.44279	2.30913e-79
ENST00000319715.10-16-17_53	RBBP6	4.35161	9.46821e-79
ENST00000252108.8-11-18_11	UBE4A	3.83564	1.54192e-78
ENST00000247461.9-2-13_4	CANX	4.30136	2.60983e-78
ENST00000541284.5-6-10_377	CNOT4	4.08619	4.48155e-78
ENST00000253024.10-5-16_5	TRIM28	4.11003	1.06482e-77
ENST00000311635.12-8-8_153	FBXO31	4.18605	3.33347e-77
ENST00000216455.9-5-10_23	PSMA3	4.19928	4.22523e-77
ENST00000267973.7-8-9_41	WDR61	3.99642	9.40908e-77
ENST00000471841.6-4-16_18	MFN1	3.7094	4.08734e-75
ENST00000424310.7-6-9_30	RNF145	3.88347	4.23922e-75
ENST00000369278.5-6-18_167	UFL1	6.45909	6.30061e-75
ENST00000457167.9-1-13_686	DNAJC7	4.10556	6.9426e-75
ENST00000379624.6-10-10_2093	BABAM2	6.06317	1.24386e-74
ENST00000379540.8-20-23_6	NFX1	3.69593	1.30566e-74
ENST00000219313.9-1-6_141	PSMD7	3.76643	1.88368e-74
ENST00000262435.14-15-18_86	SMURF2	6.65101	7.06833e-74
ENST00000314191.7-33-85_24	PRKDC	3.88872	7.06382e-74
ENST00000296003.9-14-18_113	MTMR14	8.01094	8.64769e-74
ENST00000399332.6-40-41_9	HECTD1	6.69042	7.871e-73
ENST00000295704.7-1-9_234	RNF25	3.63554	8.37765e-73
ENST00000373910.9-6-6_20	UBE2D1	4.16324	1.19661e-72
ENST00000378045.5-2-4_196	FUNDC1	3.97983	1.92605e-72
ENST00000520539.6-45-58_11	UBR5	3.6818	2.70375e-72
ENST00000324439.9-3-8_306	RCHY1	3.97126	3.04621e-72
ENST00000619920.4-8-11_16	PSMC3	4.0979	1.29289e-71
ENST00000306627.8-2-4_217	UBE2E1	3.85692	1.73107e-71
ENST00000216455.9-2-10_64	PSMA3	4.18371	6.68936e-71
ENST00000252015.3-13-18_55	TRPC4AP	3.73516	7.58973e-71
ENST00000216133.10-3-5_232	CBX7	9.61818	1.35379e-70
ENST00000170447.12-2-7_47	MKRN2	3.81443	1.7296e-70
ENST00000380445.8-1-23_907	VPS16	3.52317	9.34046e-70
ENST00000300417.10-13-23_64	LRSAM1	3.70184	9.98629e-70
ENST00000379540.8-18-23_82	NFX1	7.13793	3.47636e-69
ENST00000261819.8-10-16_6	ANAPC5	5.78662	6.44365e-69
ENST00000395665.9-7-13_5	FBXW10	5.61086	1.23513e-68
ENST00000283632.5-8-8_27	RMND5A	-5.02315	1.0115e-67
ENST00000282041.11-17-43_67	EPG5	3.56613	1.45532e-66
ENST00000414423.9-4-13_47	WDR26	3.38339	1.17484e-65
ENST00000265062.8-1-4_106	RAB7A	3.60857	1.26116e-65
ENST00000651528.2-25-41_12	DEPDC5	3.73116	2.53892e-65
ENST00000380445.8-14-23_22	VPS16	3.93142	3.02777e-65
ENST00000544301.7-6-8_5	VIM	3.59351	3.16985e-65
ENST00000291900.7-4-14_75	ZER1	6.51462	5.98458e-65
ENST00000267973.7-7-9_141	WDR61	3.39138	1.39869e-64
ENST00000283632.5-6-8_25	RMND5A	5.63224	3.77951e-64
ENST00000533727.5-7-16_997	AMBRA1	3.67679	5.29444e-64
ENST00000225726.10-8-11_22	CCDC47	3.46563	7.95514e-64
ENST00000301281.11-1-10_134	UBXN6	3.47416	1.76018e-63
ENST00000379341.9-4-6_62	PRDX4	3.39446	2.18282e-63
ENST00000361070.9-8-11_30	RFWD3	6.33158	2.62834e-63
ENST00000313221.8-17-17_306	FBXL13	8.78295	3.42789e-62
ENST00000394420.9-12-13_161	RSPRY1	3.3372	1.72386e-61
ENST00000290649.10-13-13_117	AMFR	7.06865	8.44992e-61
ENST00000261819.8-13-16_16	ANAPC5	3.2218	1.12142e-60
ENST00000367630.9-3-7_12	VTA1	3.3093	1.28838e-60
ENST00000317991.9-1-19_197	GRAMD1A	3.22083	1.36229e-60
ENST00000359154.7-8-22_163	WWP2	4.79007	1.93526e-60
ENST00000317506.8-2-13_713	RANBP10	7.97103	3.33468e-60
ENST00000299767.10-2-17_12	HSP90B1	3.41859	4.23525e-60
ENST00000295131.3-7-8_119	ZSWIM2	7.18472	4.92143e-60
ENST00000262294.12-13-23_54	TRIM37	8.92846	1.76099e-59
ENST00000377534.8-8-30_61	LMO7	5.80011	2.44563e-59
ENST00000438980.7-2-6_94	GPR137	4.31022	3.22437e-59
ENST00000300093.9-3-9_56	PLK1	3.18026	1.38312e-58
ENST00000264414.9-4-15_36	CUL3	5.34228	2.87127e-58
ENST00000328879.9-3-5_530	KLHL22	3.48824	6.93591e-58
ENST00000216455.9-5-10_64	PSMA3	4.95384	8.99164e-58
ENST00000331272.9-3-8_10	FBXW4	3.56413	1.1563e-57
ENST00000313221.8-1-17_21	FBXL13	4.00746	1.18752e-57
ENST00000394030.8-6-17_39	CBLB	6.32235	1.74245e-57
ENST00000622495.5-1-11_29	FBXO21	3.27949	2.05265e-57
ENST00000262820.7-1-6_105	KLHL13	7.74641	2.49935e-57
ENST00000358465.7-4-19_487	TRIM33	5.32533	7.1491e-57
ENST00000450056.7-9-16_77	CHFR	7.09371	1.38991e-56
ENST00000366592.8-2-6_246	GPR137B	3.8224	1.69369e-56
ENST00000219313.9-6-6_62	PSMD7	7.01091	1.93407e-56
ENST00000366862.10-2-4_1	FBXO28	5.91916	2.44075e-56
ENST00000263966.8-13-20_453	USP13	6.06832	2.57902e-56
ENST00000066544.8-9-18_225	CDC27	4.82211	1.31317e-55
ENST00000252015.3-13-18_120	TRPC4AP	6.15975	9.26339e-55
ENST00000358465.7-15-19_101	TRIM33	3.33282	9.81277e-55
ENST00000271308.9-6-8_30	PSMA5	6.17028	1.27106e-54
ENST00000321867.6-16-27_59	ULK1	7.60693	1.29741e-54
ENST00000253496.4-10-13_43	F12	5.9909	4.41727e-54
ENST00000319172.10-6-7_63	TMEM39A	4.38586	5.31652e-54
ENST00000263666.9-4-9_105	PDZRN3	8.34588	5.41112e-54
ENST00000508164.6-8-8_48	TSPAN17	5.34351	1.03253e-53
ENST00000351808.10-13-24_115	IFT88	4.03889	1.1401e-53
ENST00000170447.12-1-7_188	MKRN2	2.97381	1.29733e-53
ENST00000455511.7-7-10_46	ANAPC7	4.61791	1.35788e-53
ENST00000495893.7-1-14_124	PHC3	4.74275	3.08585e-53
ENST00000011619.6-8-13_8	RANBP9	3.53422	4.04693e-53
ENST00000290649.10-5-13_3	AMFR	3.2252	4.78364e-52
ENST00000298068.10-3-20_3	HECTD2	3.1932	5.46899e-52
ENST00000282041.11-6-43_4	EPG5	3.49425	7.09396e-52
ENST00000296003.9-16-18_37	MTMR14	2.92457	1.27248e-51
ENST00000257548.10-1-12_112	USP30	3.49481	3.43257e-51
ENST00000440859.8-5-5_52	CBLL1	5.19848	4.21427e-51
ENST00000535923.6-8-9_32	PHB2	5.78432	8.94407e-51
ENST00000399598.7-6-7_45	UBXN2B	6.19373	9.05679e-51
ENST00000374272.4-2-8_224	TRIM63	4.65808	2.73821e-50
ENST00000300289.10-8-12_7	PDIA3	3.50341	3.49699e-50
ENST00000367435.5-1-16_189	CDC73	3.15798	3.83832e-50
ENST00000290649.10-7-13_16	AMFR	4.5117	5.36136e-50
ENST00000354619.10-12-15_1	ERO1B	5.48653	1.50321e-49
ENST00000402738.6-10-23_108	HERC3	3.93659	2.76431e-49
ENST00000261464.10-1-9_82	TRAF5	4.71191	2.96141e-49
ENST00000378747.8-5-12_37	OPTN	6.3791	3.51049e-49
ENST00000232766.6-8-9_45	KLHL18	4.09423	5.9792e-49
ENST00000361371.10-18-29_20	LTN1	2.89534	9.08309e-49
ENST00000264926.7-4-12_39	RAD18	3.54767	1.04284e-48
ENST00000647358.2-4-9_144	CBLC	5.86979	1.29867e-48
ENST00000507656.6-2-3_116	ANAPC10	2.93415	2.1015e-48
ENST00000258947.8-5-11_10	CALCOCO2	2.9319	1.35873e-47
ENST00000321297.10-7-17_136	ATG16L2	6.2617	2.19492e-47
ENST00000374080.8-31-44_21	MED12	3.78551	2.96092e-47
ENST00000323557.12-10-12_18	FBXO9	4.00875	3.87953e-47
ENST00000354449.7-7-17_11	ATG7	4.41023	5.00875e-47
ENST00000369939.8-17-21_67	ELAPOR1	3.29166	1.35109e-46
ENST00000299767.10-2-17_34	HSP90B1	2.90268	1.5104e-46
ENST00000271308.9-6-8_41	PSMA5	6.17216	1.7199e-46
ENST00000358901.11-1-16_116	VCP	2.86071	7.91554e-46
ENST00000265742.8-6-18_304	ANKIB1	7.63821	8.99576e-46
ENST00000453744.7-6-6_62	UBE2D3	6.22043	2.05152e-45
ENST00000359154.7-11-22_75	WWP2	2.81416	2.14786e-45
ENST00000331272.9-2-8_118	FBXW4	6.65079	2.17245e-45
ENST00000265651.8-2-10_90	FBXO3	4.68278	2.37193e-45
ENST00000232766.6-8-9_122	KLHL18	3.11805	1.00061e-44
ENST00000371528.2-12-13_35	ZYG11A	5.83651	1.02406e-44
ENST00000307720.4-6-9_12	PPID	2.76792	1.52077e-44
ENST00000366898.6-6-11_4286	PRKN	7.62233	1.57361e-44
ENST00000420843.7-1-15_5213	ARRB1	4.31878	5.43365e-44
ENST00000356840.8-5-6_68	MYLIP	5.18237	5.73367e-44
ENST00000556143.6-6-10_7	ZFYVE1	4.13088	8.11934e-44
ENST00000650932.1-10-15_104	UHRF1	4.44422	1.00357e-43
ENST00000399464.7-14-28_30	NEURL4	5.16565	1.1434e-43
ENST00000399332.6-20-41_1	HECTD1	7.36339	1.24624e-43
ENST00000324972.10-3-15_126	DYNC1I1	6.96346	1.80887e-43
ENST00000439977.7-6-7_21	HERPUD1	2.75018	2.13255e-43
ENST00000319715.10-2-17_100	RBBP6	2.98857	2.29632e-43
ENST00000545606.6-6-14_21	CAND1	4.81262	2.69998e-43
ENST00000402738.6-19-23_16	HERC3	6.53776	4.34903e-43
ENST00000316218.12-3-16_607	PDIA5	-2.86561	9.24035e-43
ENST00000389851.10-12-12_139	UVSSA	4.11647	1.09807e-42
ENST00000300417.10-12-23_26	LRSAM1	2.6679	1.25455e-42
ENST00000379887.9-7-13_27	ARIH1	4.1134	1.81359e-42
ENST00000517970.6-22-22_82	WWP1	4.83004	1.85166e-42
ENST00000356840.8-5-6_42	MYLIP	7.01121	1.99822e-42
ENST00000596358.6-2-7_44	NOSIP	4.81139	2.62037e-42
ENST00000361371.10-8-29_20	LTN1	2.61116	9.0534e-42
ENST00000283351.10-27-28_359	TRAPPC8	2.71596	9.51223e-42
ENST00000326132.11-3-5_5	RNF185	3.08981	1.17198e-41
ENST00000221566.7-5-9_86	SGTA	4.9916	1.22194e-41
ENST00000398246.8-8-11_61	LONRF1	5.97256	3.12282e-41
ENST00000380445.8-9-23_5	VPS16	4.12531	5.76523e-41
ENST00000361371.10-18-29_51	LTN1	4.34132	8.81757e-41
ENST00000612750.5-8-10_119	DCAF13	3.10867	9.19286e-41
ENST00000359154.7-17-22_24	WWP2	5.80446	1.24961e-40
ENST00000280326.9-4-10_25	CCT5	4.4434	1.50881e-40
ENST00000262370.12-4-16_178	MGRN1	5.30413	1.53741e-40
ENST00000395544.9-14-26_131	ULK2	6.41185	1.58061e-40
ENST00000261497.9-7-12_149	USP22	3.67706	1.99957e-40
ENST00000344836.9-21-30_50	USP7	4.5502	2.80497e-40
NTC_76551	NA	3.63469	3.42505e-40
ENST00000317991.9-1-19_623	GRAMD1A	2.50966	4.86018e-40
ENST00000582970.5-36-66_30	RNF213	5.27293	6.00144e-40
ENST00000232978.13-12-15_66	NKTR	9.58925	6.10824e-40
ENST00000308987.6-1-2_2	CKS1B	4.03541	8.42102e-40
ENST00000290649.10-7-13_41	AMFR	2.85548	1.24456e-39
ENST00000296464.9-10-18_89	HSPA4L	2.70141	1.86516e-39
ENST00000648994.2-9-10_67	GAN	4.77834	2.24871e-39
ENST00000216879.8-8-8_144	NSFL1C	2.89648	3.94321e-39
ENST00000315436.8-2-8_215	WSB2	5.155	6.46498e-39
ENST00000410062.9-1-4_12	UBE2E3	2.5894	1.33274e-38
ENST00000356455.9-1-5_61	UBE2C	4.08707	1.35735e-38
ENST00000579016.6-12-13_30	ENGASE	5.89369	1.45693e-38
ENST00000280700.10-1-11_264	NGLY1	2.56311	1.5277e-38
ENST00000270225.12-4-8_34	SAE1	3.91093	2.50965e-38
ENST00000362072.8-2-6_29	DRD2	-4.46364	2.74826e-38
ENST00000272227.8-11-12_52	PDIA6	-2.59605	2.80284e-38
ENST00000399332.6-21-41_13	HECTD1	7.04075	3.06922e-38
ENST00000229268.13-13-19_34	USP5	2.4786	3.99834e-38
ENST00000622495.5-10-11_129	FBXO21	4.0103	4.00813e-38
ENST00000083182.8-2-12_65	APPBP2	4.50332	4.81963e-38
ENST00000495893.7-1-14_231	PHC3	2.98894	8.40964e-38
ENST00000639579.1-10-12_12	ATG9B	3.05345	8.77535e-38
ENST00000272227.8-6-12_21	PDIA6	2.45208	8.91889e-38
ENST00000235150.5-8-8_33	RNF19B	3.56803	9.5626e-38
ENST00000316218.12-3-16_162	PDIA5	5.31447	1.29675e-37
ENST00000324344.9-1-1_26	DCUN1D3	6.88081	1.8809e-37
ENST00000377534.8-25-30_54	LMO7	4.6913	2.04833e-37
ENST00000238497.10-8-10_2	VPS4B	2.80997	3.36408e-37
ENST00000262294.12-16-23_150	TRIM37	6.00126	3.96589e-37
ENST00000275603.9-1-13_64	CCT6A	2.5201	4.2239e-37
ENST00000337138.9-8-14_82	HIF1A	5.90221	5.16914e-37
ENST00000356136.8-9-14_14	UVRAG	-2.47205	7.51959e-37
ENST00000399017.6-36-44_12	TTC3	5.45638	8.22465e-37
ENST00000377524.8-2-13_106	STAM	-2.50196	8.37459e-37
ENST00000374864.10-11-22_30	ITCH	2.56326	9.30066e-37
ENST00000295704.7-4-9_7	RNF25	4.93167	1.09295e-36
ENST00000284637.14-10-10_396	SH3RF1	2.8168	2.20021e-36
ENST00000446818.6-2-20_141	TBC1D5	4.86242	3.94932e-36
ENST00000389629.8-4-17_111	RTF1	-2.57003	6.01336e-36
ENST00000269260.7-1-14_456	ARRB2	3.72022	1.35833e-35
ENST00000343090.11-19-27_40	UBE4B	4.24593	1.38458e-35
ENST00000359154.7-8-22_168	WWP2	3.42345	1.48063e-35
ENST00000373943.9-2-8_160	STX12	2.57813	1.75651e-35
ENST00000361756.8-2-8_162	RNF121	4.88069	1.92221e-35
ENST00000350612.11-19-24_9	SUPT20H	3.78205	2.02941e-35
ENST00000343526.9-15-18_57	TRIM24	3.38586	2.2499e-35
ENST00000409757.9-1-12_1363	TBC1D14	2.56994	2.74376e-35
ENST00000409790.6-2-23_121	CLEC16A	2.40188	4.23252e-35
ENST00000374080.8-41-44_55	MED12	3.43432	4.8699e-35
ENST00000356638.8-5-23_61	GANAB	3.71839	5.14545e-35
ENST00000263904.5-7-13_174	STAM2	5.24992	6.44972e-35
ENST00000248566.3-2-2_25	SEM1	4.15383	6.94166e-35
ENST00000367942.4-11-15_24	ATF6	4.82993	7.83971e-35
ENST00000582970.5-61-66_44	RNF213	2.68857	1.52337e-34
ENST00000242209.9-1-9_241	FKBP9	-2.42999	2.26796e-34
ENST00000371322.11-3-19_16	CUL4B	3.87495	2.43226e-34
ENST00000355528.9-11-38_64	TBCD	6.05361	2.44666e-34
ENST00000419743.7-3-9_289	FBXO15	5.36551	2.55239e-34
ENST00000321394.12-5-11_30	TCP1	2.66367	4.50899e-34
ENST00000296438.9-2-9_15	FBXW12	6.72366	5.50733e-34
ENST00000342697.5-2-2_454	TP53INP1	2.92325	6.49009e-34
ENST00000399598.7-2-7_524	UBXN2B	4.61833	6.95234e-34
ENST00000517970.6-8-22_118	WWP1	3.74635	9.08081e-34
ENST00000469044.6-21-21_319	ARMC8	5.14794	1.20299e-33
ENST00000282041.11-28-43_57	EPG5	3.83409	1.69572e-33
ENST00000267115.10-1-8_1	TMBIM6	3.31499	1.72892e-33
ENST00000367669.8-1-19_979	COP1	7.5455	1.99115e-33
ENST00000269397.9-2-4_26	CBX4	2.39062	4.01298e-33
ENST00000389629.8-4-17_112	RTF1	4.25735	5.41288e-33
ENST00000339852.5-3-5_88	NCCRP1	3.93215	6.36392e-33
ENST00000324849.9-1-11_201	VPS37A	5.5063	7.3414e-33
ENST00000264639.9-4-11_25	PSMD3	2.49092	8.74976e-33
ENST00000342697.5-2-2_413	TP53INP1	6.38832	9.73475e-33
ENST00000324685.11-12-18_2	RNF40	3.72108	1.39309e-32
ENST00000397119.8-13-16_14	DYNC1I2	-3.16299	2.22293e-32
ENST00000252015.3-12-18_72	TRPC4AP	3.54454	2.48845e-32
ENST00000261593.8-4-6_19	RNF138	5.46883	3.04539e-32
ENST00000373700.9-9-22_6	HERC4	2.27149	5.96449e-32
ENST00000265651.8-1-10_194	FBXO3	6.72794	6.22987e-32
ENST00000602117.1-1-3_17	MARCHF2	3.16604	6.56432e-32
ENST00000379540.8-5-23_187	NFX1	5.25095	7.33869e-32
ENST00000255764.4-2-3_208	MED10	2.60096	8.69278e-32
ENST00000306368.9-1-4_93	RNF181	5.78324	1.04033e-31
ENST00000326181.11-8-19_88	TRAF7	2.31477	1.11262e-31
ENST00000257548.10-12-12_20	USP30	3.34666	1.41527e-31
ENST00000361189.7-5-8_56	PJA2	2.8716	2.05486e-31
ENST00000338591.8-8-11_59	KLHL17	5.18484	3.66904e-31
ENST00000262493.12-2-7_7920	GNAO1	4.06783	3.84909e-31
ENST00000367669.8-2-19_336	COP1	5.13649	5.90406e-31
ENST00000392017.9-16-17_77	ATG16L1	3.46412	6.09408e-31
ENST00000261819.8-10-16_71	ANAPC5	2.24522	6.48754e-31
ENST00000397066.9-10-16_305	CCNF	3.21849	7.48501e-31
ENST00000344836.9-21-30_33	USP7	8.268	7.76422e-31
ENST00000544440.7-28-82_18	MYCBP2	3.72258	7.81421e-31
ENST00000358395.11-1-4_113	RNF24	2.21107	1.06057e-30
ENST00000298355.7-8-9_6	TRIM9	2.35668	1.10072e-30
ENST00000343090.11-6-27_6	UBE4B	3.35989	1.22278e-30
ENST00000520539.6-41-58_2	UBR5	-2.45247	1.31813e-30
ENST00000429979.6-5-12_45	RUBCNL	3.88334	1.66315e-30
ENST00000261819.8-4-16_233	ANAPC5	-2.37418	1.6806e-30
ENST00000399332.6-9-41_221	HECTD1	-2.44095	1.90825e-30
ENST00000370187.8-6-13_223	BTRC	2.32328	2.05917e-30
ENST00000397066.9-15-16_57	CCNF	3.49348	2.07503e-30
ENST00000296343.10-1-19_891	RUBCN	3.32566	2.26691e-30
ENST00000342494.8-10-25_148	UBE3B	5.17201	2.58237e-30
ENST00000357654.9-12-21_67	BRCA1	2.89328	3.44748e-30
ENST00000232766.6-7-9_9	KLHL18	3.90576	3.47656e-30
ENST00000287598.11-8-22_47	BUB1B	2.65094	4.69664e-30
ENST00000326132.11-1-5_149	RNF185	2.96071	5.89977e-30
ENST00000378060.9-3-13_148	VPS36	3.95436	6.3245e-30
ENST00000339077.10-9-10_16	KLHL7	5.09641	6.53786e-30
ENST00000642610.2-2-15_331	TBCE	3.1693	7.18212e-30
ENST00000439977.7-5-7_30	HERPUD1	6.31852	1.29639e-29
ENST00000261819.8-7-16_59	ANAPC5	3.19728	1.44376e-29
ENST00000372172.5-3-20_11	HECTD3	4.28891	1.47254e-29
ENST00000246957.10-16-17_92	TRAP1	3.17959	1.49631e-29
ENST00000231368.10-14-17_5	LNPEP	3.21987	1.55439e-29
ENST00000254337.10-10-12_26	DCAF15	4.98529	2.07971e-29
ENST00000319715.10-2-17_5	RBBP6	3.50051	3.95542e-29
ENST00000264414.9-4-15_7	CUL3	2.8097	5.39127e-29
ENST00000356136.8-9-14_2	UVRAG	4.2047	8.44033e-29
ENST00000410062.9-1-4_83	UBE2E3	2.27968	8.81614e-29
ENST00000265651.8-8-10_56	FBXO3	2.24747	8.95387e-29
ENST00000283351.10-20-28_24	TRAPPC8	3.82101	1.53366e-28
ENST00000394128.7-6-24_19	MED24	2.27821	2.0121e-28
ENST00000394886.7-13-15_46	CDC23	5.4641	2.11446e-28
ENST00000348370.9-8-12_61	RNF111	2.78167	3.54492e-28
ENST00000259457.8-3-7_31	PSMB7	6.68858	3.85731e-28
ENST00000300650.9-5-13_850	RNF214	2.82868	4.00951e-28
ENST00000367696.7-8-18_101	RC3H1	3.79928	4.45082e-28
ENST00000254337.10-11-12_2	DCAF15	2.46924	4.49953e-28
ENST00000394657.12-7-8_66	AKTIP	4.08477	5.28915e-28
ENST00000260970.8-5-11_204	PPIG	7.58184	5.7828e-28
ENST00000356638.8-1-23_359	GANAB	2.25701	5.88086e-28
ENST00000352689.11-1-17_903	MKLN1	4.445	8.55353e-28
ENST00000674063.1-15-21_29	PIK3CB	4.76952	1.25389e-27
ENST00000269439.12-7-7_29	RNF165	4.31526	1.76246e-27
ENST00000392017.9-6-17_210	ATG16L1	2.08667	1.76941e-27
ENST00000367942.4-10-15_54	ATF6	4.94787	1.89535e-27
ENST00000394570.7-10-18_11	UNC45B	3.22453	3.02511e-27
ENST00000396703.6-1-4_442	UBE2E2	2.89164	3.07894e-27
ENST00000292363.10-2-8_49	RNF126	3.85646	3.32072e-27
ENST00000582970.5-5-66_20	RNF213	5.76586	4.01954e-27
ENST00000264350.8-18-22_285	HERC5	3.80586	4.0562e-27
ENST00000356763.8-13-18_160	PIK3R4	-2.0972	5.92309e-27
ENST00000369278.5-17-18_4	UFL1	4.77882	6.01973e-27
ENST00000367942.4-13-15_65	ATF6	-2.5513	6.83432e-27
ENST00000262903.9-23-23_30	HACE1	4.1368	1.63329e-26
ENST00000376753.9-2-4_79	FBXO6	4.93864	2.80029e-26
ENST00000307720.4-6-9_78	PPID	5.82873	2.83982e-26
ENST00000394817.7-6-8_5179	SIL1	3.24336	2.95114e-26
ENST00000340253.10-18-20_28	FBXO38	7.70538	3.45612e-26
ENST00000367435.5-1-16_92	CDC73	3.14646	4.13125e-26
ENST00000422003.6-6-6_1193	TBCEL	4.79523	4.19199e-26
ENST00000376753.9-2-4_43	FBXO6	6.93259	4.72783e-26
ENST00000351808.10-6-24_68	IFT88	-6.97398	4.8519e-26
ENST00000376395.9-9-10_19	UBQLN1	4.50955	5.48654e-26
ENST00000268148.13-2-3_16	DET1	4.47727	5.62233e-26
ENST00000216879.8-2-8_410	NSFL1C	-2.86956	7.61657e-26
ENST00000394030.8-13-17_119	CBLB	4.13679	8.67704e-26
ENST00000361756.8-7-8_23	RNF121	4.29233	8.77711e-26
ENST00000263966.8-5-20_30	USP13	4.12078	1.23157e-25
ENST00000264350.8-18-22_272	HERC5	2.65667	1.4696e-25
ENST00000313050.11-11-29_26	SEC16A	4.38734	1.49364e-25
ENST00000334136.11-3-27_149	HDAC6	3.96612	1.55293e-25
ENST00000370253.6-2-14_43	FNBP1L	3.53927	1.70418e-25
ENST00000389851.10-12-12_17	UVSSA	3.69461	1.8906e-25
ENST00000367435.5-6-16_32	CDC73	7.54655	1.94082e-25
ENST00000445930.7-5-13_7	PSMC6	3.48046	1.98366e-25
ENST00000338591.8-1-11_107	KLHL17	-2.15804	2.13188e-25
ENST00000444643.7-6-7_155	DNAJB12	2.4361	2.3008e-25
ENST00000397119.8-5-16_93	DYNC1I2	1.98153	2.54014e-25
ENST00000272227.8-2-12_202	PDIA6	2.19405	3.17873e-25
ENST00000299300.11-6-15_3	CCT2	2.10234	3.78157e-25
ENST00000275603.9-5-13_20	CCT6A	3.01884	4.91569e-25
ENST00000401950.7-6-17_197	MTMR3	7.00703	5.3358e-25
ENST00000356232.10-1-11_99	UBA5	2.09882	5.88595e-25
ENST00000392017.9-8-17_42	ATG16L1	2.95922	7.0294e-25
ENST00000457167.9-1-13_902	DNAJC7	2.2854	7.93475e-25
ENST00000356232.10-8-11_35	UBA5	4.09337	8.72041e-25
ENST00000319715.10-16-17_39	RBBP6	2.10014	9.60649e-25
ENST00000288828.9-9-12_56	WIPI2	2.5194	1.37568e-24
ENST00000366991.5-8-14_3	DTL	2.78903	1.39533e-24
ENST00000287777.5-5-5_113	KLHL40	3.69205	1.60459e-24
ENST00000261819.8-4-16_228	ANAPC5	2.02629	2.69508e-24
ENST00000396271.8-12-12_257	ACBD5	2.07025	2.90883e-24
ENST00000372901.2-43-46_41	UBR2	2.76569	3.15815e-24
ENST00000392745.8-1-9_46	TRAF3	4.87041	5.08526e-24
ENST00000336126.6-2-8_212	PCGF5	2.57668	5.89076e-24
ENST00000274255.11-4-9_63	SKP2	3.47901	6.76979e-24
ENST00000264350.8-2-22_24	HERC5	6.18365	7.44597e-24
ENST00000326132.11-1-5_219	RNF185	2.02288	7.57592e-24
ENST00000447648.7-13-23_29	TECPR1	5.30062	9.34943e-24
ENST00000372172.5-2-20_18	HECTD3	5.94734	1.27232e-23
NTC_77357	NA	3.80172	1.93856e-23
ENST00000269385.9-3-4_9	CBX8	2.89496	2.27746e-23
ENST00000393094.7-11-18_197	CUL5	3.26808	2.84349e-23
ENST00000316059.7-4-10_3	ZFP91	1.96478	3.55922e-23
ENST00000348721.4-1-2_63	CISH	2.91932	4.0618e-23
ENST00000344836.9-12-30_8	USP7	4.6587	4.16879e-23
ENST00000377071.9-6-22_291	KDM2B	5.00927	4.82324e-23
ENST00000361367.7-22-24_62	CTR9	2.69272	5.12091e-23
ENST00000375254.8-73-105_147	UBR4	3.07705	7.14948e-23
ENST00000417314.2-2-3_64	KBTBD8	-2.03043	8.15494e-23
ENST00000590996.6-8-19_15	NBR1	4.60981	8.2242e-23
ENST00000443617.7-38-76_105	HERC1	4.59336	8.76861e-23
ENST00000674063.1-18-21_37	PIK3CB	5.47562	9.78931e-23
ENST00000322244.10-2-32_370	UBA6	7.75647	1.16685e-22
ENST00000314355.7-1-2_192	CKS2	-2.20373	1.36798e-22
ENST00000336126.6-2-8_63	PCGF5	-1.85728	1.37931e-22
ENST00000347901.9-10-10_69	HAP1	2.53467	1.48157e-22
ENST00000409790.6-2-23_178	CLEC16A	6.53681	1.49779e-22
ENST00000361368.7-11-17_55	SMURF1	4.75558	1.69218e-22
ENST00000284142.7-1-2_206	ASB17	3.7101	2.42653e-22
ENST00000360280.8-54-71_125	VPS13A	2.17792	2.8144e-22
ENST00000287598.11-22-22_32	BUB1B	3.76326	2.92177e-22
ENST00000262903.9-10-23_144	HACE1	2.93607	3.16494e-22
ENST00000263904.5-2-13_22	STAM2	2.76324	3.61178e-22
ENST00000259512.9-7-7_183	DERL1	1.82622	4.20182e-22
ENST00000292363.10-5-8_10	RNF126	8.03498	4.24204e-22
ENST00000648994.2-9-10_242	GAN	-2.09829	4.6589e-22
ENST00000299767.10-5-17_71	HSP90B1	2.52645	4.87344e-22
ENST00000263925.8-1-9_4248	LNX1	3.66535	8.27545e-22
ENST00000315368.8-13-27_111	ANAPC4	5.08112	9.60378e-22
ENST00000269305.9-1-9_8	TP53	1.95594	1.10155e-21
ENST00000370794.7-14-22_44	USP33	2.78081	1.14896e-21
ENST00000255977.7-1-7_243	MKRN1	2.92767	1.41808e-21
ENST00000619920.4-8-11_56	PSMC3	1.95152	1.58581e-21
ENST00000319380.12-4-17_58	UBE2O	3.53532	1.61418e-21
NTC_76475	NA	4.3323	1.62349e-21
ENST00000262139.10-1-12_291	WIPI1	3.10756	1.71704e-21
ENST00000379263.8-7-16_2	DNAJC2	3.666	1.75636e-21
ENST00000334136.11-5-27_95	HDAC6	3.40095	1.93942e-21
ENST00000379341.9-3-6_33	PRDX4	-5.304	2.15083e-21
ENST00000373700.9-20-22_117	HERC4	1.95889	2.43255e-21
ENST00000356763.8-12-18_274	PIK3R4	4.8378	2.6908e-21
ENST00000382368.8-3-4_527	FBXL18	2.16174	2.76732e-21
ENST00000557658.6-11-18_39	VIPAS39	1.92074	3.11185e-21
ENST00000399598.7-2-7_106	UBXN2B	3.76785	3.86332e-21
ENST00000354449.7-2-17_150	ATG7	3.87031	5.06098e-21
ENST00000545606.6-6-14_4	CAND1	4.16438	5.49023e-21
ENST00000223321.9-4-7_6	PSMA2	3.15553	8.09076e-21
ENST00000320740.12-1-6_7	PELI3	-6.03368	8.79145e-21
ENST00000011619.6-10-13_162	RANBP9	5.98434	9.33389e-21
ENST00000404125.6-1-45_65	PSME4	-1.76544	1.11406e-20
ENST00000325222.9-10-20_55	CUL1	-1.8235	1.31924e-20
ENST00000262482.11-5-8_12	RNF167	1.98994	1.38035e-20
ENST00000602402.6-7-11_31	DNAJC3	2.02166	1.38561e-20
ENST00000292644.5-4-11_17	PSMC2	3.56118	1.49209e-20
ENST00000371558.7-2-5_8	UBE2A	2.28108	1.58147e-20
ENST00000242719.4-2-2_10	RNF11	2.78375	1.7125e-20
ENST00000550765.6-4-5_38	FKBP11	2.58783	1.80303e-20
ENST00000258198.7-7-12_19	DYNC1LI2	1.92086	2.67369e-20
ENST00000369747.8-1-9_371	UBE3D	4.4525	2.90603e-20
ENST00000394817.7-3-8_407	SIL1	-1.73091	2.92041e-20
ENST00000261497.9-12-12_126	USP22	7.26125	3.25553e-20
ENST00000375254.8-84-105_32	UBR4	2.9463	3.28893e-20
ENST00000282041.11-28-43_1	EPG5	4.45332	3.41035e-20
ENST00000367669.8-1-19_902	COP1	-1.77353	3.55632e-20
ENST00000261593.8-4-6_37	RNF138	-1.73058	4.16942e-20
ENST00000539276.7-18-19_50	ATP2A2	-1.74315	4.30777e-20
ENST00000395665.9-7-13_11	FBXW10	3.30763	5.43133e-20
ENST00000382368.8-4-4_145	FBXL18	3.63949	5.56951e-20
ENST00000389902.8-11-15_16	RNF216	-1.72573	5.8355e-20
ENST00000252108.8-18-18_59	UBE4A	2.91443	6.03424e-20
ENST00000527733.7-27-27_4	USP47	4.6205	6.07661e-20
ENST00000287598.11-1-22_55	BUB1B	1.79469	6.48027e-20
ENST00000216271.10-1-19_5	HDAC10	1.8169	7.01992e-20
ENST00000366592.8-6-6_187	GPR137B	3.76344	7.2027e-20
ENST00000374864.10-11-22_74	ITCH	3.13617	7.57351e-20
ENST00000421745.6-17-73_16	BIRC6	7.16166	1.11413e-19
ENST00000392894.8-5-8_337	RNF13	3.92364	1.43769e-19
ENST00000361368.7-17-17_156	SMURF1	4.66801	1.55159e-19
ENST00000356840.8-4-6_5	MYLIP	-1.7175	1.55916e-19
ENST00000269397.9-3-4_199	CBX4	-1.79534	1.68598e-19
ENST00000361367.7-18-24_35	CTR9	4.80407	1.76392e-19
ENST00000379887.9-2-13_529	ARIH1	2.10016	1.88608e-19
ENST00000422003.6-3-6_18	TBCEL	3.90225	1.99649e-19
ENST00000300289.10-7-12_34	PDIA3	4.18746	2.27127e-19
ENST00000261537.7-12-20_312	MIB1	-2.26348	2.7595e-19
ENST00000264658.11-2-14_503	FBXL20	4.4771	2.92821e-19
ENST00000247461.9-7-13_68	CANX	2.33772	3.09284e-19
ENST00000206595.11-9-13_78	G2E3	-1.68155	3.27397e-19
ENST00000262294.12-12-23_71	TRIM37	3.98982	3.41694e-19
ENST00000259339.7-3-4_24	TOR1B	-5.64429	3.49379e-19
ENST00000314167.9-15-27_239	GAK	-2.37511	4.37674e-19
ENST00000310942.9-2-4_71	CBX2	1.87329	4.60461e-19
ENST00000348165.10-10-22_401	UBE3C	-1.68009	5.03913e-19
ENST00000273130.9-1-12_10	DYNC1LI1	2.34471	6.62593e-19
ENST00000262854.11-24-80_39	HUWE1	-2.40336	6.88419e-19
ENST00000324849.9-4-11_222	VPS37A	-1.67859	7.54821e-19
ENST00000591916.7-1-6_65	PTGES3L	3.39223	8.54422e-19
ENST00000389629.8-7-17_13	RTF1	2.45672	8.77167e-19
ENST00000262294.12-10-23_51	TRIM37	4.00191	8.85874e-19
ENST00000262903.9-2-23_31	HACE1	-5.58572	1.03651e-18
ENST00000276893.10-3-15_1008	UHRF2	3.25786	1.09659e-18
ENST00000361070.9-1-11_368	RFWD3	-1.7197	1.27766e-18
ENST00000219313.9-6-6_32	PSMD7	-1.66256	1.38044e-18
ENST00000320892.11-4-6_358	RNF144A	2.88359	1.50564e-18
ENST00000320740.12-2-6_244	PELI3	3.19159	1.65578e-18
ENST00000295030.6-1-3_379	PEX13	2.21546	1.99968e-18
ENST00000533727.5-15-16_119	AMBRA1	2.47859	2.29953e-18
ENST00000374864.10-12-22_46	ITCH	2.69319	2.93948e-18
ENST00000269260.7-1-14_98	ARRB2	1.7517	3.03821e-18
ENST00000170447.12-1-7_693	MKRN2	2.1282	3.09206e-18
ENST00000341423.10-2-3_11	HMGB1	2.34535	3.60949e-18
ENST00000232766.6-7-9_328	KLHL18	1.81222	3.88957e-18
ENST00000267938.9-9-12_153	UBE2Q2	-3.90629	4.07598e-18
ENST00000262406.10-7-18_55	RGS9	2.06483	4.28028e-18
ENST00000377560.9-47-75_5	HECTD4	2.27439	6.27109e-18
ENST00000263228.4-3-4_529	UBE2R2	6.30113	6.97187e-18
ENST00000422003.6-5-6_16	TBCEL	3.41734	7.07048e-18
ENST00000343090.11-3-27_158	UBE4B	3.88254	8.59413e-18
ENST00000370794.7-6-22_70	USP33	-3.11138	9.24572e-18
ENST00000328879.9-3-5_249	KLHL22	2.53014	9.29667e-18
ENST00000354449.7-14-17_75	ATG7	2.6144	9.57209e-18
ENST00000394222.8-5-9_126	ARL13B	3.49062	1.15286e-17
ENST00000367435.5-6-16_7	CDC73	2.35442	1.45792e-17
ENST00000319715.10-13-17_17	RBBP6	2.75301	1.55572e-17
ENST00000380377.9-1-3_1386	TBCA	6.75466	1.77064e-17
ENST00000611155.4-1-5_104	XBP1	1.85451	1.96903e-17
ENST00000324439.9-3-8_475	RCHY1	1.84379	2.21134e-17
ENST00000274140.10-2-25_27	MARCHF6	-1.89965	2.35847e-17
ENST00000267115.10-1-8_17	TMBIM6	3.342	2.37409e-17
ENST00000421745.6-4-73_6	BIRC6	-1.67501	2.45076e-17
ENST00000334136.11-9-27_65	HDAC6	5.42742	2.58656e-17
ENST00000397292.8-6-13_144	PLAA	3.09806	2.68464e-17
ENST00000367510.8-2-5_30	RNF2	3.84911	2.83431e-17
ENST00000307720.4-6-9_51	PPID	-4.01954	2.87663e-17
ENST00000282041.11-22-43_43	EPG5	2.33468	2.98783e-17
ENST00000360280.8-37-71_18	VPS13A	4.08181	2.99548e-17
ENST00000303210.9-6-8_11	GNB2	4.38003	3.0448e-17
ENST00000326132.11-3-5_150	RNF185	3.07895	3.18671e-17
ENST00000343090.11-7-27_547	UBE4B	2.58316	3.26706e-17
ENST00000251968.4-6-9_121	TSG101	-2.28429	3.28521e-17
ENST00000006777.11-3-3_261	RHBDD2	1.59835	3.5823e-17
ENST00000374749.8-1-19_70	CUL2	2.44405	3.6542e-17
ENST00000455511.7-1-10_254	ANAPC7	3.53457	3.7115e-17
ENST00000367679.7-5-5_15	CACYBP	2.80048	4.37053e-17
ENST00000418476.2-11-19_40	UNC45A	-3.48958	4.52112e-17
ENST00000359154.7-8-22_154	WWP2	3.92826	5.09683e-17
ENST00000358465.7-15-19_27	TRIM33	5.68501	5.13367e-17
ENST00000359154.7-17-22_51	WWP2	6.24127	5.59866e-17
ENST00000517970.6-7-22_90	WWP1	3.24882	5.69748e-17
ENST00000394030.8-2-17_4056	CBLB	3.03268	6.85012e-17
ENST00000646124.2-5-20_81	LZTR1	-6.0739	7.09557e-17
ENST00000423759.6-37-37_200	TAF1	-2.22986	7.93693e-17
ENST00000317506.8-6-13_25	RANBP10	2.86218	8.07219e-17
ENST00000504652.5-15-22_27	DCAF1	-2.3177	8.08382e-17
ENST00000378372.8-9-13_14	HSPA14	2.73314	8.52301e-17
ENST00000456430.6-2-14_342	CAND2	4.07675	8.70172e-17
ENST00000315436.8-7-8_10	WSB2	4.11099	9.12308e-17
ENST00000378747.8-4-12_26	OPTN	4.56016	1.08382e-16
NTC_76899	NA	3.53766	1.09695e-16
ENST00000290650.9-32-46_34	UBR1	-2.72479	1.17001e-16
ENST00000382564.8-4-5_16	DNAJC19	-2.38426	1.17175e-16
ENST00000310942.9-3-4_169	CBX2	1.51852	1.24425e-16
ENST00000296933.10-10-11_70	FBXW11	1.84637	1.32884e-16
ENST00000676185.1-7-11_98	ERCC8	2.84892	1.36124e-16
ENST00000376052.5-22-29_9	TPP2	2.2815	1.45015e-16
ENST00000372901.2-40-46_56	UBR2	3.73326	1.49387e-16
ENST00000221943.14-2-5_13	DMAC2	2.95208	1.60241e-16
ENST00000262039.9-22-24_189	PIK3C3	-2.56906	1.8461e-16
ENST00000280700.10-1-11_121	NGLY1	1.83491	1.88089e-16
ENST00000300650.9-7-13_38	RNF214	2.46656	2.05551e-16
ENST00000295542.6-9-15_104	DCST1	3.05329	2.07465e-16
ENST00000262493.12-5-7_96	GNAO1	2.44089	2.13594e-16
ENST00000389221.9-2-14_259	UNKL	4.67817	2.33119e-16
ENST00000395686.8-15-15_38	ERO1A	2.2673	2.44003e-16
ENST00000254101.4-2-6_29	PRKAB2	3.75423	2.48652e-16
ENST00000246957.10-6-17_200	TRAP1	3.19016	2.55567e-16
ENST00000396271.8-12-12_107	ACBD5	-1.68757	2.56999e-16
ENST00000329286.7-2-5_346	RAB12	2.18892	2.834e-16
ENST00000264350.8-6-22_39	HERC5	3.7929	3.06166e-16
ENST00000321297.10-2-17_100	ATG16L2	-2.13299	3.70738e-16
ENST00000311481.11-1-5_324	RAB1B	2.05182	3.82729e-16
ENST00000338591.8-1-11_117	KLHL17	2.46263	3.84015e-16
ENST00000367669.8-11-19_998	COP1	1.54074	4.05774e-16
ENST00000652555.1-8-10_683	FBXW8	3.4913	4.25977e-16
ENST00000262854.11-28-80_16	HUWE1	2.4065	4.31466e-16
ENST00000296161.9-4-4_28	DTX3L	4.93635	4.48486e-16
ENST00000367435.5-16-16_27	CDC73	1.51336	4.85082e-16
ENST00000361189.7-5-8_325	PJA2	3.14859	4.99428e-16
ENST00000262455.7-3-11_154	ERP44	-1.74614	5.70154e-16
ENST00000367942.4-13-15_121	ATF6	-2.08416	6.42295e-16
ENST00000247178.6-7-9_40	ATG14	2.24759	6.60833e-16
ENST00000358377.7-4-12_123	DCAF4	-2.26042	9.49412e-16
ENST00000232564.8-3-8_115	GNB4	-1.76891	9.56248e-16
ENST00000354911.9-11-13_9	WAC	3.53598	9.92209e-16
ENST00000310942.9-3-4_192	CBX2	2.06923	9.94019e-16
ENST00000358465.7-13-19_43	TRIM33	-1.80504	1.05556e-15
ENST00000276893.10-6-15_244	UHRF2	-1.52548	1.17609e-15
ENST00000264926.7-4-12_209	RAD18	-2.41168	1.27379e-15
ENST00000323037.5-3-3_176	ZNRF2	2.86954	1.27372e-15
ENST00000394030.8-12-17_268	CBLB	5.1965	1.30115e-15
ENST00000259457.8-3-7_13	PSMB7	3.506	1.4239e-15
ENST00000379540.8-20-23_33	NFX1	3.29273	1.42287e-15
ENST00000305783.13-4-8_8	RNFT1	8.09878	1.52991e-15
ENST00000296933.10-10-11_25	FBXW11	-1.64752	1.53762e-15
ENST00000256497.9-3-11_50	EDEM1	-2.64273	1.6613e-15
ENST00000317991.9-16-19_122	GRAMD1A	5.32504	1.71144e-15
ENST00000329271.8-1-3_174	GRPEL2	1.51545	1.73771e-15
ENST00000242209.9-5-9_39	FKBP9	-1.52875	1.75397e-15
ENST00000648817.1-7-11_166	DNAJC21	1.4898	1.76078e-15
ENST00000397128.6-5-8_82	PRKAA1	-1.98676	2.10662e-15
ENST00000361367.7-22-24_40	CTR9	1.59594	2.17014e-15
ENST00000321867.6-24-27_7	ULK1	-1.53808	2.50209e-15
ENST00000216271.10-16-19_38	HDAC10	3.4747	2.57188e-15
ENST00000319715.10-13-17_55	RBBP6	5.58027	2.71203e-15
ENST00000262177.9-6-8_15	DNAJB6	-1.65306	2.86956e-15
ENST00000520530.3-7-11_12	FBXO41	2.52192	3.08069e-15
ENST00000366862.10-2-4_71	FBXO28	1.67937	3.09735e-15
ENST00000320585.11-4-10_27	CHORDC1	1.96832	3.18436e-15
ENST00000373943.9-2-8_21	STX12	-1.58539	3.39005e-15
ENST00000252108.8-9-18_50	UBE4A	-3.30603	3.41124e-15
ENST00000369851.7-5-7_118	GNAI3	-1.45133	3.93662e-15
ENST00000470229.6-7-13_277	NUB1	3.34489	4.03212e-15
ENST00000265742.8-6-18_127	ANKIB1	2.93433	4.09583e-15
ENST00000263904.5-11-13_138	STAM2	-1.74195	4.16001e-15
ENST00000265742.8-8-18_242	ANKIB1	2.25409	4.16415e-15
ENST00000322122.8-4-5_15	TRIM72	-2.12791	4.20733e-15
ENST00000262394.7-6-8_23	WSB1	-1.72873	4.31975e-15
ENST00000215574.9-4-4_309	CDC34	-1.54185	5.14769e-15
ENST00000372901.2-5-46_103	UBR2	-1.47526	6.70016e-15
ENST00000287598.11-20-22_95	BUB1B	-3.53766	6.79539e-15
ENST00000170447.12-6-7_351	MKRN2	2.1018	7.37332e-15
ENST00000527733.7-5-27_70	USP47	-1.52676	7.67217e-15
ENST00000310942.9-2-4_113	CBX2	-1.62516	8.11392e-15
ENST00000246957.10-16-17_188	TRAP1	1.8658	8.39118e-15
ENST00000367669.8-8-19_130	COP1	2.17121	8.82667e-15
ENST00000229328.10-2-6_50	PRKAB1	-1.61947	8.89543e-15
ENST00000504102.6-2-8_97	SPOP	2.2341	9.232e-15
ENST00000370794.7-14-22_49	USP33	2.12964	9.3331e-15
ENST00000262493.12-4-7_912	GNAO1	3.23343	1.01373e-14
ENST00000369939.8-3-21_549	ELAPOR1	1.83162	1.04204e-14
ENST00000484310.6-1-6_122	DRAM2	-4.90608	1.12352e-14
ENST00000263228.4-4-4_75	UBE2R2	-1.56729	1.15331e-14
ENST00000267115.10-1-8_9	TMBIM6	3.16946	1.17478e-14
ENST00000298288.11-3-3_166	LRR1	1.74153	1.19428e-14
ENST00000377724.8-3-6_260	DCAF10	-3.67956	1.25992e-14
ENST00000311635.12-8-8_258	FBXO31	-2.99849	1.29093e-14
ENST00000317040.12-4-8_36	MVB12A	8.06036	1.31908e-14
ENST00000237455.5-3-3_281	RNF103	5.2458	1.5155e-14
ENST00000440928.6-13-16_106	RGS7	1.72849	1.55406e-14
ENST00000675855.1-11-14_25	PEX5	2.57592	1.56653e-14
ENST00000579016.6-12-13_48	ENGASE	3.10578	1.78079e-14
ENST00000360280.8-69-71_9	VPS13A	-2.92111	1.9882e-14
ENST00000310430.11-14-26_69	TNKS	-2.8585	2.10099e-14
ENST00000349431.11-1-5_279	UBE2J2	2.31717	2.3284e-14
ENST00000329286.7-2-5_166	RAB12	-1.50364	2.82468e-14
ENST00000272227.8-11-12_26	PDIA6	9.13631	2.9887e-14
ENST00000343090.11-20-27_29	UBE4B	3.59806	3.00353e-14
ENST00000590996.6-7-19_8	NBR1	-5.21134	3.07368e-14
ENST00000340253.10-7-20_41	FBXO38	-5.49283	3.26528e-14
ENST00000646124.2-8-20_198	LZTR1	-1.87375	3.45921e-14
ENST00000442697.7-2-7_314	DNAJB14	1.51526	3.74492e-14
ENST00000377560.9-35-75_36	HECTD4	2.08283	3.79087e-14
ENST00000361756.8-2-8_78	RNF121	5.87155	3.84332e-14
ENST00000517970.6-12-22_42	WWP1	2.93895	4.1102e-14
ENST00000348165.10-11-22_141	UBE3C	-1.85526	4.4069e-14
ENST00000269122.8-16-31_109	CLTC	-2.5176	4.96713e-14
ENST00000331272.9-7-8_29	FBXW4	4.73699	5.41252e-14
ENST00000262370.12-13-16_118	MGRN1	-2.36234	5.7943e-14
ENST00000322244.10-1-32_236	UBA6	-2.67966	6.04235e-14
ENST00000367669.8-8-19_561	COP1	-1.47471	6.0741e-14
ENST00000376663.8-2-8_6	BMI1	4.18841	6.12859e-14
ENST00000284320.6-11-11_74	TOMM70	1.55324	6.44266e-14
ENST00000300651.11-7-16_52	MED1	2.194	6.81241e-14
ENST00000377670.9-1-14_245	HIF3A	3.78271	7.86234e-14
ENST00000470229.6-7-13_280	NUB1	-3.02676	8.15888e-14
ENST00000233741.9-2-13_20	FANCL	-2.51496	8.24194e-14
ENST00000295888.9-63-64_36	WDFY3	-1.84853	8.26407e-14
ENST00000393077.3-7-7_6727	VTI1A	1.53829	9.0329e-14
ENST00000247461.9-7-13_66	CANX	3.15278	9.25628e-14
ENST00000310430.11-25-26_158	TNKS	3.45731	9.43394e-14
ENST00000520539.6-22-58_168	UBR5	1.98925	9.80352e-14
ENST00000321394.12-7-11_120	TCP1	2.08952	1.136e-13
ENST00000216879.8-7-8_109	NSFL1C	2.93713	1.20664e-13
ENST00000368884.8-2-9_39	PSMD4	-3.3195	1.22963e-13
ENST00000360184.10-3-77_10	DYNC1H1	2.75098	1.26138e-13
ENST00000367435.5-1-16_56	CDC73	2.61568	1.29358e-13
ENST00000368309.4-2-10_50	UBQLN4	2.2554	1.30865e-13
ENST00000557658.6-9-18_99	VIPAS39	4.02495	1.32205e-13
ENST00000326873.12-3-8_90	STK11	2.63459	1.34539e-13
ENST00000373910.9-6-6_16	UBE2D1	2.79798	1.34755e-13
ENST00000324439.9-3-8_597	RCHY1	-2.18626	1.38446e-13
ENST00000394420.9-13-13_57	RSPRY1	-2.04134	1.5103e-13
NTC_77395	NA	-3.18891	1.58881e-13
ENST00000296388.10-12-14_36	P3H1	2.69885	1.59219e-13
ENST00000360632.8-4-5_18	WWTR1	4.28096	1.6161e-13
ENST00000265651.8-4-10_40	FBXO3	-1.62052	1.94682e-13
ENST00000356638.8-17-23_24	GANAB	2.26999	2.31628e-13
ENST00000323037.5-3-3_71	ZNRF2	-1.39232	2.32378e-13
ENST00000358465.7-5-19_5	TRIM33	-3.02226	2.43086e-13
ENST00000527733.7-23-27_1	USP47	2.05631	2.49221e-13
ENST00000409757.9-3-12_59	TBC1D14	6.28555	2.55198e-13
ENST00000358935.3-1-5_984	MARCHF5	-1.79674	2.5622e-13
ENST00000375254.8-84-105_27	UBR4	3.59792	2.56509e-13
ENST00000520539.6-28-58_49	UBR5	1.69799	2.79331e-13
ENST00000288828.9-1-12_191	WIPI2	2.16192	2.81382e-13
ENST00000541284.5-6-10_79	CNOT4	-2.01392	3.53454e-13
ENST00000604729.6-9-25_1	ZSWIM8	2.61321	3.79984e-13
ENST00000520539.6-53-58_5	UBR5	-3.28078	3.82559e-13
ENST00000389902.8-4-15_18	RNF216	-4.20639	3.86032e-13
ENST00000377670.9-8-14_97	HIF3A	4.01352	4.00017e-13
ENST00000354287.5-4-5_44	FBXO2	-5.66587	4.01164e-13
ENST00000316059.7-6-10_2	ZFP91	2.75382	4.11728e-13
ENST00000321867.6-16-27_78	ULK1	2.68173	4.14318e-13
ENST00000321297.10-2-17_2	ATG16L2	-1.3819	4.19767e-13
ENST00000044462.12-4-7_1	PSMA4	-2.05949	4.49027e-13
ENST00000377190.8-7-14_12	SYVN1	2.1543	4.51552e-13
ENST00000254950.13-8-10_7	VPS4A	1.79902	4.65505e-13
ENST00000528494.5-4-16_54	ATG13	7.4701	4.82886e-13
ENST00000379887.9-5-13_92	ARIH1	2.59334	4.86614e-13
ENST00000675903.1-31-40_11	TRIP12	-1.92779	4.95825e-13
ENST00000424310.7-6-9_18	RNF145	1.61861	5.04463e-13
ENST00000319394.8-11-14_340	WDTC1	3.84332	5.06798e-13
ENST00000262406.10-7-18_464	RGS9	-2.69222	5.51836e-13
ENST00000011619.6-2-13_356	RANBP9	4.50275	5.59791e-13
ENST00000439351.5-1-9_131	DNAJB11	-1.74574	6.00172e-13
ENST00000037243.7-3-3_296	GABARAPL2	4.19466	6.23946e-13
ENST00000420843.7-11-15_45	ARRB1	5.28646	6.65352e-13
ENST00000520530.3-3-11_18	FBXO41	3.53811	6.82211e-13
ENST00000646124.2-8-20_51	LZTR1	3.4362	6.97409e-13
ENST00000379540.8-22-23_24	NFX1	2.5757	7.43237e-13
ENST00000380003.8-4-9_57	C9orf72	3.18018	7.47456e-13
ENST00000373033.6-6-7_58	TFEB	-3.02327	7.79196e-13
ENST00000221265.8-10-13_12	PAF1	3.74988	7.84645e-13
ENST00000443617.7-9-76_41	HERC1	-2.73879	8.16592e-13
ENST00000337737.8-3-3_49	DTX3	4.92676	8.314e-13
ENST00000641686.2-1-11_236	MFSD8	-2.14941	9.16979e-13
ENST00000247178.6-9-9_559	ATG14	2.6001	9.20423e-13
ENST00000265651.8-2-10_62	FBXO3	3.30103	9.41281e-13
ENST00000377264.8-30-40_18	ATG2A	-2.34851	9.56223e-13
ENST00000376980.8-5-11_43	DNAJC1	-1.32097	9.63753e-13
ENST00000378308.7-25-43_425	USP9X	3.71432	9.74711e-13
ENST00000504102.6-8-8_67	SPOP	2.92738	1.0073e-12
ENST00000361368.7-13-17_151	SMURF1	-3.10254	1.01629e-12
ENST00000611155.4-1-5_76	XBP1	-1.3371	1.01824e-12
ENST00000261721.9-1-7_622	BTBD1	-1.3951	1.04174e-12
ENST00000369278.5-6-18_146	UFL1	-2.83783	1.07873e-12
ENST00000378060.9-3-13_54	VPS36	-3.2122	1.0853e-12
ENST00000392017.9-6-17_22	ATG16L1	-1.39565	1.11276e-12
ENST00000409175.6-4-8_127	MARCHF7	-1.47983	1.1422e-12
ENST00000216218.8-1-11_196	ST13	2.96573	1.14916e-12
ENST00000675903.1-20-40_66	TRIP12	-1.41089	1.16788e-12
ENST00000443617.7-71-76_11	HERC1	-1.61024	1.24956e-12
ENST00000399598.7-7-7_1	UBXN2B	-4.32419	1.32457e-12
ENST00000359154.7-18-22_10	WWP2	3.17988	1.35997e-12
ENST00000502399.7-15-17_53	MARK2	2.55954	1.38051e-12
ENST00000288828.9-8-12_314	WIPI2	2.78575	1.40564e-12
ENST00000268058.8-2-8_319	PML	2.48423	1.74547e-12
ENST00000642610.2-3-15_28	TBCE	2.25543	1.78146e-12
ENST00000367840.3-17-21_166	DCAF6	5.78425	1.7971e-12
ENST00000343526.9-13-18_17	TRIM24	-1.47443	1.80176e-12
ENST00000375254.8-25-105_59	UBR4	1.29912	1.8957e-12
ENST00000262506.8-1-10_26	CSNK2A2	-3.30673	1.92085e-12
ENST00000003084.11-1-26_1135	CFTR	3.00203	2.01153e-12
ENST00000291900.7-12-14_133	ZER1	4.4785	2.01215e-12
ENST00000354911.9-13-13_47	WAC	-2.58105	2.02494e-12
ENST00000296933.10-10-11_20	FBXW11	1.70761	2.05475e-12
ENST00000350612.11-13-24_28	SUPT20H	-3.11269	2.10521e-12
ENST00000374864.10-8-22_32	ITCH	2.43876	2.12598e-12
ENST00000354619.10-15-15_93	ERO1B	-1.48143	2.14992e-12
ENST00000252015.3-13-18_44	TRPC4AP	4.94282	2.16397e-12
ENST00000251047.6-4-12_30	LMAN1	-1.30301	2.20214e-12
ENST00000642610.2-7-15_43	TBCE	3.07025	2.24217e-12
ENST00000247178.6-7-9_23	ATG14	4.52576	2.32417e-12
ENST00000232766.6-5-9_129	KLHL18	1.29447	2.44288e-12
ENST00000370693.5-1-2_82	BAG2	-1.35633	2.47916e-12
ENST00000348165.10-11-22_265	UBE3C	5.5406	2.482e-12
ENST00000590996.6-9-19_20	NBR1	-2.13774	2.58363e-12
ENST00000300289.10-8-12_43	PDIA3	2.01203	2.71328e-12
ENST00000446197.8-1-13_91	DCAF11	-1.53423	3.01045e-12
ENST00000361756.8-5-8_52	RNF121	2.79168	3.10881e-12
ENST00000354449.7-9-17_71	ATG7	-2.62091	3.16863e-12
ENST00000255977.7-2-7_231	MKRN1	1.91388	3.31489e-12
ENST00000229328.10-2-6_18	PRKAB1	-2.49635	3.3424e-12
ENST00000231948.8-10-10_26	CRBN	2.46194	3.46191e-12
ENST00000648817.1-7-11_213	DNAJC21	-1.32527	3.87954e-12
ENST00000330045.12-8-9_13	BRCC3	-4.7927	4.01213e-12
ENST00000360943.10-3-6_134	UBE2Z	2.81212	4.03775e-12
ENST00000262506.8-1-10_136	CSNK2A2	-1.3608	4.15963e-12
ENST00000338591.8-1-11_14	KLHL17	-1.32567	4.24124e-12
ENST00000284637.14-6-10_51	SH3RF1	-2.03313	4.28306e-12
ENST00000562103.2-10-13_4	ZNF598	-4.22211	4.41683e-12
ENST00000262903.9-10-23_134	HACE1	2.8211	4.6296e-12
ENST00000370794.7-6-22_99	USP33	-2.88839	4.63319e-12
ENST00000394420.9-12-13_280	RSPRY1	1.94913	4.76492e-12
ENST00000470229.6-3-13_72	NUB1	3.27002	5.09086e-12
ENST00000380377.9-1-3_990	TBCA	-1.34055	5.11933e-12
ENST00000292644.5-5-11_5	PSMC2	2.91013	5.61332e-12
ENST00000361367.7-18-24_14	CTR9	-1.87736	5.98688e-12
ENST00000324439.9-7-8_29	RCHY1	2.03793	6.01358e-12
ENST00000264033.6-12-15_315	CBL	2.18599	6.05914e-12
ENST00000244061.6-1-5_71	RNF114	-1.29283	6.67657e-12
ENST00000622495.5-3-11_80	FBXO21	1.29568	7.65349e-12
ENST00000504102.6-8-8_121	SPOP	-1.66853	7.7107e-12
ENST00000343090.11-22-27_77	UBE4B	1.2639	7.8179e-12
ENST00000378747.8-8-12_20	OPTN	2.48002	7.91947e-12
ENST00000290650.9-46-46_58	UBR1	2.07014	8.23002e-12
ENST00000334136.11-17-27_11	HDAC6	2.84207	8.41998e-12
ENST00000319394.8-13-14_67	WDTC1	2.71795	8.52201e-12
ENST00000333486.4-15-23_6	UBA7	7.29631	8.71101e-12
ENST00000283632.5-4-8_531	RMND5A	-5.06203	9.12038e-12
ENST00000395686.8-7-15_70	ERO1A	-1.38195	9.35829e-12
ENST00000261819.8-4-16_75	ANAPC5	-1.50906	9.64159e-12
ENST00000066544.8-4-18_85	CDC27	-8.08371	9.95315e-12
ENST00000232978.13-12-15_55	NKTR	2.50746	1.07672e-11
ENST00000262039.9-2-24_149	PIK3C3	-2.18334	1.08873e-11
ENST00000370558.8-7-8_344	SH3GLB1	-1.87958	1.09413e-11
ENST00000361371.10-17-29_47	LTN1	-1.27111	1.11985e-11
ENST00000044462.12-3-7_61	PSMA4	-1.93507	1.23017e-11
NTC_76587	NA	2.60245	1.23353e-11
ENST00000358901.11-1-16_272	VCP	-1.45282	1.2523e-11
ENST00000219313.9-1-6_46	PSMD7	-2.85327	1.29726e-11
ENST00000377724.8-1-6_115	DCAF10	3.22568	1.30838e-11
ENST00000264607.9-2-4_245	ASB1	-1.42579	1.38748e-11
ENST00000375254.8-103-105_38	UBR4	-2.35957	1.44215e-11
ENST00000401950.7-14-17_21	MTMR3	-1.99066	1.44959e-11
ENST00000394030.8-3-17_359	CBLB	-3.20367	1.48657e-11
ENST00000287598.11-11-22_11	BUB1B	-2.52655	1.65074e-11
ENST00000231948.8-9-10_10	CRBN	2.2874	1.68971e-11
ENST00000306627.8-1-4_214	UBE2E1	-1.33238	1.6993e-11
ENST00000216879.8-7-8_194	NSFL1C	2.87631	1.73376e-11
ENST00000379540.8-23-23_32	NFX1	1.73587	1.82953e-11
ENST00000370794.7-19-22_17	USP33	3.77407	1.83671e-11
ENST00000256379.10-2-7_11	MED6	2.43733	2.00064e-11
ENST00000319394.8-6-14_76	WDTC1	2.60091	2.13542e-11
ENST00000396981.6-2-4_131	UBE2G1	2.25971	2.17212e-11
ENST00000228495.11-5-6_61	KCTD10	2.04282	2.17791e-11
ENST00000326132.11-3-5_71	RNF185	-3.20888	2.19792e-11
ENST00000356401.9-2-13_160	ARIH2	1.74152	2.20885e-11
ENST00000674063.1-12-21_71	PIK3CB	-7.37793	2.21532e-11
ENST00000222402.8-6-6_65	UBE2D4	9.79925	2.24074e-11
ENST00000304979.8-4-8_38	PPIH	6.02357	2.24202e-11
ENST00000439977.7-4-7_7	HERPUD1	-1.33366	2.3711e-11
ENST00000420843.7-10-15_123	ARRB1	6.68886	2.38972e-11
ENST00000296464.9-1-18_272	HSPA4L	2.31452	2.44472e-11
ENST00000377534.8-2-30_626	LMO7	-1.87707	2.71748e-11
ENST00000526995.6-1-5_97	TRAF6	-2.08681	2.76966e-11
ENST00000287598.11-11-22_8	BUB1B	-2.96553	2.83997e-11
ENST00000209884.5-6-10_9	KLHL20	2.07549	2.88837e-11
ENST00000262039.9-3-24_44	PIK3C3	2.14177	2.94863e-11
ENST00000562103.2-8-13_6	ZNF598	-1.3219	3.01534e-11
ENST00000259605.11-3-11_68	RNF38	1.75914	3.18818e-11
NTC_77036	NA	5.16474	3.25612e-11
ENST00000247461.9-2-13_27	CANX	1.68742	3.31116e-11
ENST00000300289.10-1-12_16	PDIA3	1.79792	3.32599e-11
ENST00000361070.9-5-11_92	RFWD3	-1.9285	3.34342e-11
ENST00000223321.9-3-7_53	PSMA2	2.38113	3.48955e-11
ENST00000298355.7-8-9_21	TRIM9	-1.87224	3.55258e-11
ENST00000374080.8-31-44_2	MED12	-1.24004	3.85267e-11
ENST00000604729.6-7-25_39	ZSWIM8	-2.41372	3.85048e-11
ENST00000394886.7-11-15_19	CDC23	-1.76896	3.86465e-11
ENST00000410062.9-2-4_2188	UBE2E3	3.5327	4.10649e-11
ENST00000635887.1-8-14_51	CLN3	2.25928	4.2065e-11
ENST00000392017.9-14-17_200	ATG16L1	3.07149	4.22417e-11
NTC_77433	NA	1.52208	4.24925e-11
ENST00000300289.10-7-12_39	PDIA3	-1.7484	4.32039e-11
ENST00000265651.8-4-10_63	FBXO3	-1.77872	4.40878e-11
ENST00000310053.10-1-24_72	HLTF	1.43135	4.47767e-11
ENST00000298068.10-20-20_134	HECTD2	3.02115	4.85956e-11
ENST00000287598.11-15-22_49	BUB1B	-1.48565	4.90863e-11
ENST00000221200.9-2-11_77	KCTD9	-2.56911	5.0233e-11
ENST00000477973.4-3-3_30	RYBP	-8.52473	5.02982e-11
ENST00000641686.2-8-11_49	MFSD8	-1.32817	5.0629e-11
ENST00000650372.1-6-26_93	ABCB11	2.1455	5.19407e-11
ENST00000374080.8-41-44_76	MED12	-5.80687	5.45374e-11
ENST00000216271.10-16-19_56	HDAC10	-2.76147	5.61641e-11
ENST00000348370.9-2-12_86	RNF111	3.00319	5.64444e-11
ENST00000274255.11-9-9_214	SKP2	3.90228	5.78633e-11
ENST00000179259.6-1-5_44	TIGAR	-1.21976	5.83919e-11
ENST00000263966.8-8-20_48	USP13	3.34175	5.98585e-11
ENST00000377524.8-7-13_51	STAM	-1.56769	6.13333e-11
ENST00000399332.6-29-41_45	HECTD1	-2.20919	6.3273e-11
ENST00000373943.9-2-8_63	STX12	1.37281	6.80255e-11
ENST00000487349.6-6-8_50	ASB14	1.70698	7.2102e-11
ENST00000374023.8-1-4_1515	ILRUN	1.32333	7.30295e-11
ENST00000359933.6-31-41_13	ATG2B	2.38534	7.3903e-11
ENST00000648336.2-10-10_15	UBE3A	-3.66406	7.52796e-11
ENST00000287598.11-1-22_204	BUB1B	-6.00629	8.25714e-11
ENST00000382363.8-4-8_70	RNF215	-2.97664	8.2518e-11
ENST00000044462.12-3-7_7	PSMA4	-1.29104	8.26551e-11
ENST00000675843.1-5-61_23	ATM	3.19967	8.28672e-11
ENST00000232978.13-11-15_65	NKTR	-1.50089	8.4081e-11
ENST00000395891.7-27-27_173	HECW1	2.13133	8.69827e-11
ENST00000255977.7-5-7_26	MKRN1	-1.94942	8.73057e-11
ENST00000300651.11-6-16_15	MED1	2.49211	9.02803e-11
ENST00000327697.11-2-37_3	RNF123	3.99989	9.03628e-11
ENST00000268148.13-2-3_136	DET1	1.54396	9.89782e-11
ENST00000259253.11-12-40_62	UGGT1	2.78701	1.02121e-10
ENST00000345093.9-4-4_15	RNF41	-1.47408	1.03315e-10
ENST00000399464.7-14-28_53	NEURL4	-1.56079	1.03489e-10
ENST00000399017.6-35-44_95	TTC3	2.49507	1.04838e-10
ENST00000295901.9-6-7_145	PSMD6	-1.2874	1.06512e-10
ENST00000397292.8-1-13_13	PLAA	-1.81027	1.11785e-10
ENST00000358303.9-6-9_63	ZC3HC1	-1.37967	1.14303e-10
ENST00000596358.6-2-7_32	NOSIP	1.56668	1.14662e-10
ENST00000283632.5-4-8_512	RMND5A	1.83907	1.14921e-10
ENST00000300417.10-15-23_146	LRSAM1	-1.74952	1.16462e-10
ENST00000340253.10-1-20_13	FBXO38	-1.34881	1.17792e-10
ENST00000378444.9-10-13_137	BCOR	1.70855	1.21752e-10
ENST00000359154.7-12-22_20	WWP2	-1.19891	1.2542e-10
ENST00000238497.10-8-10_21	VPS4B	3.61825	1.25961e-10
ENST00000379887.9-2-13_231	ARIH1	-3.06419	1.2609e-10
ENST00000324972.10-3-15_539	DYNC1I1	3.59298	1.2987e-10
ENST00000394128.7-18-24_133	MED24	2.13883	1.31392e-10
ENST00000528494.5-4-16_38	ATG13	2.24757	1.32904e-10
ENST00000261819.8-4-16_93	ANAPC5	-1.2625	1.40099e-10
ENST00000357244.7-9-19_184	RC3H2	1.72059	1.44141e-10
ENST00000366862.10-2-4_56	FBXO28	-2.30191	1.45241e-10
ENST00000457167.9-6-13_58	DNAJC7	-1.61909	1.46777e-10
ENST00000362072.8-2-6_21	DRD2	4.67855	1.54233e-10
ENST00000307720.4-6-9_40	PPID	2.61351	1.56504e-10
ENST00000357266.9-5-9_313	FKBP5	1.76695	1.63672e-10
ENST00000372901.2-31-46_7	UBR2	-2.28822	1.69182e-10
ENST00000283290.10-3-11_15	ATG3	-2.07454	1.70645e-10
ENST00000373578.7-2-10_223	SRC	2.0204	1.73002e-10
ENST00000533632.6-4-4_8	TRAPPC4	-2.36762	1.82205e-10
ENST00000376227.4-1-16_169	CCDC22	1.17522	1.85459e-10
ENST00000238497.10-8-10_63	VPS4B	1.58664	1.93571e-10
ENST00000216479.8-1-8_61	AHSA1	-1.89203	1.9966e-10
ENST00000254950.13-6-10_90	VPS4A	3.87099	2.0508e-10
ENST00000602402.6-6-11_8	DNAJC3	-2.59559	2.09739e-10
ENST00000504652.5-11-22_144	DCAF1	2.15242	2.1121e-10
ENST00000368884.8-1-9_163	PSMD4	-1.83565	2.13376e-10
ENST00000544301.7-1-8_126	VIM	3.57921	2.14768e-10
ENST00000502399.7-14-17_117	MARK2	2.27889	2.20375e-10
ENST00000261537.7-16-20_30	MIB1	2.21867	2.227e-10
ENST00000521072.7-7-7_118	PPIL6	1.72449	2.2614e-10
ENST00000300417.10-12-23_55	LRSAM1	2.26802	2.37601e-10
ENST00000261758.6-2-2_4	MESD	-3.91184	2.50851e-10
ENST00000329271.8-1-3_85	GRPEL2	1.38753	2.79073e-10
ENST00000275603.9-8-13_3	CCT6A	-1.37817	2.822e-10
ENST00000263634.8-7-8_117	ASB3	-1.74832	2.90688e-10
ENST00000308284.10-1-24_25	SEC16B	2.70384	2.91028e-10
ENST00000356232.10-1-11_112	UBA5	-1.36559	2.96399e-10
ENST00000262506.8-1-10_83	CSNK2A2	-1.99673	3.00621e-10
ENST00000648817.1-10-11_170	DNAJC21	-1.26014	3.09436e-10
ENST00000261819.8-10-16_88	ANAPC5	2.93399	3.11761e-10
ENST00000368636.8-2-5_9	BNIP3	-1.24345	3.16138e-10
ENST00000269439.12-2-7_82	RNF165	-1.77056	3.21808e-10
ENST00000313221.8-12-17_154	FBXL13	-2.55066	3.24163e-10
ENST00000216218.8-1-11_157	ST13	4.90749	3.25105e-10
ENST00000675903.1-28-40_40	TRIP12	-1.8326	3.25453e-10
ENST00000280326.9-4-10_123	CCT5	-8.55167	3.53356e-10
ENST00000674063.1-18-21_13	PIK3CB	4.12422	3.60493e-10
ENST00000360943.10-5-6_29	UBE2Z	2.0052	3.63974e-10
ENST00000288828.9-10-12_54	WIPI2	-3.03599	3.75495e-10
ENST00000254950.13-8-10_35	VPS4A	1.16752	3.76057e-10
ENST00000502399.7-17-17_67	MARK2	-2.92845	3.98285e-10
ENST00000291900.7-14-14_237	ZER1	3.60262	4.0037e-10
ENST00000676185.1-7-11_151	ERCC8	-2.94641	4.04305e-10
ENST00000544440.7-48-82_56	MYCBP2	-6.00345	4.07051e-10
ENST00000288828.9-1-12_30	WIPI2	-1.14849	4.1536e-10
ENST00000359568.10-14-46_182	PCNT	-1.35447	4.27071e-10
ENST00000358465.7-4-19_788	TRIM33	5.00646	4.30741e-10
ENST00000369956.7-3-3_59	FBXL15	-3.19793	4.38441e-10
ENST00000232978.13-13-15_55	NKTR	1.88067	4.46365e-10
ENST00000381070.8-13-13_9	CWC27	-2.28272	4.52713e-10
ENST00000379143.10-1-5_42	PCNA	4.36192	4.65614e-10
ENST00000358465.7-13-19_17	TRIM33	2.96769	4.88944e-10
ENST00000622495.5-1-11_89	FBXO21	1.35869	4.89931e-10
ENST00000265339.7-2-5_83	UBE2B	-1.6986	5.0086e-10
ENST00000314191.7-80-85_82	PRKDC	2.23062	5.03193e-10
ENST00000439977.7-5-7_40	HERPUD1	1.92972	5.1484e-10
ENST00000360184.10-3-77_15	DYNC1H1	2.54446	5.41452e-10
ENST00000309033.5-1-5_264	UBXN2A	2.52292	5.45503e-10
ENST00000379887.9-5-13_159	ARIH1	3.04568	5.58692e-10
ENST00000340253.10-18-20_21	FBXO38	-4.72857	5.67019e-10
ENST00000652555.1-9-10_394	FBXW8	2.01284	5.7504e-10
ENST00000300417.10-15-23_28	LRSAM1	2.61205	5.78292e-10
ENST00000423759.6-25-37_54	TAF1	-1.20136	5.78911e-10
ENST00000471841.6-9-16_68	MFN1	2.02963	5.7846e-10
ENST00000355528.9-30-38_1	TBCD	-4.94432	5.99244e-10
ENST00000379540.8-19-23_79	NFX1	4.01704	6.31254e-10
ENST00000375440.9-8-19_53	CUL4A	-1.9721	6.86019e-10
ENST00000296464.9-1-18_124	HSPA4L	3.07432	6.95934e-10
ENST00000446818.6-11-20_3435	TBC1D5	2.63405	7.07239e-10
ENST00000648336.2-1-10_96	UBE3A	-1.55341	7.22387e-10
ENST00000252015.3-13-18_159	TRPC4AP	-2.3085	7.23726e-10
ENST00000392745.8-1-9_83	TRAF3	-1.40404	7.2406e-10
ENST00000221566.7-4-9_61	SGTA	-1.80523	7.42498e-10
ENST00000456430.6-1-14_340	CAND2	-1.9291	7.6415e-10
ENST00000333486.4-1-23_3	UBA7	4.47852	7.85313e-10
ENST00000361371.10-5-29_5	LTN1	5.40497	7.94914e-10
ENST00000257575.9-5-9_324	RNFT2	3.2464	8.55495e-10
ENST00000288828.9-9-12_41	WIPI2	-4.76115	8.89855e-10
ENST00000397066.9-9-16_57	CCNF	-2.37258	9.18859e-10
ENST00000582693.5-2-8_228	RNF115	-5.22946	9.62365e-10
ENST00000231368.10-12-17_39	LNPEP	-2.17046	9.63678e-10
ENST00000371322.11-8-19_4	CUL4B	1.23651	9.68401e-10
ENST00000216034.6-2-3_33	TOMM22	2.0405	9.91249e-10
ENST00000357654.9-3-21_15	BRCA1	-3.55223	1.00357e-09
ENST00000287598.11-1-22_45	BUB1B	1.18695	1.07201e-09
ENST00000325222.9-1-20_52	CUL1	1.9862	1.09507e-09
ENST00000396981.6-2-4_487	UBE2G1	-2.51879	1.10218e-09
ENST00000641686.2-9-11_129	MFSD8	-2.57699	1.17213e-09
ENST00000321297.10-8-17_98	ATG16L2	1.34928	1.17503e-09
ENST00000358912.5-1-5_60	PELI1	-1.99301	1.19826e-09
ENST00000310942.9-2-4_146	CBX2	-1.97193	1.23241e-09
ENST00000324972.10-7-15_58	DYNC1I1	-1.92185	1.23172e-09
ENST00000215730.12-2-4_31	SNAP29	-1.84842	1.23367e-09
ENST00000382936.8-2-3_15	TMEM129	-2.39837	1.29942e-09
ENST00000305783.13-1-8_48	RNFT1	-1.31149	1.33564e-09
ENST00000379341.9-3-6_21	PRDX4	3.45829	1.39807e-09
ENST00000370794.7-17-22_10	USP33	1.86718	1.4159e-09
ENST00000262493.12-2-7_307	GNAO1	2.07303	1.41874e-09
ENST00000394570.7-10-18_26	UNC45B	1.8275	1.42724e-09
ENST00000334136.11-7-27_77	HDAC6	-3.90486	1.47202e-09
ENST00000495893.7-12-14_48	PHC3	1.85744	1.50594e-09
ENST00000367942.4-9-15_628	ATF6	1.88333	1.61767e-09
ENST00000324849.9-4-11_72	VPS37A	2.13436	1.61943e-09
ENST00000262294.12-3-23_21	TRIM37	1.7503	1.68816e-09
ENST00000335953.9-1-5_4503	ZBTB16	-7.51826	1.76029e-09
ENST00000544440.7-58-82_133	MYCBP2	2.32795	1.79284e-09
ENST00000310053.10-1-24_117	HLTF	-1.2096	1.83401e-09
ENST00000399598.7-2-7_531	UBXN2B	1.34255	1.89812e-09
ENST00000226725.11-2-14_83	KLHL2	1.83872	1.91712e-09
ENST00000314191.7-74-85_54	PRKDC	1.33078	1.98421e-09
ENST00000652555.1-4-10_459	FBXW8	-2.48217	2.03155e-09
ENST00000374864.10-22-22_31	ITCH	1.64536	2.05979e-09
ENST00000262039.9-1-24_32	PIK3C3	-1.60121	2.08819e-09
ENST00000290650.9-44-46_171	UBR1	-4.93542	2.14668e-09
ENST00000259253.11-37-40_25	UGGT1	1.65431	2.20362e-09
ENST00000264033.6-6-15_50	CBL	-1.59957	2.24804e-09
ENST00000362072.8-2-6_92	DRD2	3.27481	2.27608e-09
ENST00000313050.11-14-29_5	SEC16A	-3.94496	2.36952e-09
ENST00000358465.7-4-19_88	TRIM33	-1.41072	2.5035e-09
ENST00000375254.8-28-105_61	UBR4	-2.44904	2.52682e-09
ENST00000369847.4-3-9_48	PCGF6	-1.45413	2.63764e-09
ENST00000267973.7-7-9_181	WDR61	3.11176	2.6732e-09
ENST00000325239.11-27-60_164	WDFY4	2.13211	2.70903e-09
ENST00000378372.8-13-13_37	HSPA14	-2.74976	2.74509e-09
ENST00000419743.7-3-9_360	FBXO15	-4.28678	2.83913e-09
ENST00000246957.10-16-17_64	TRAP1	1.39042	2.90191e-09
ENST00000373700.9-9-22_14	HERC4	-2.81106	2.93158e-09
ENST00000374023.8-1-4_108	ILRUN	-1.97849	2.95385e-09
ENST00000641686.2-8-11_64	MFSD8	-2.02884	2.99689e-09
ENST00000401950.7-4-17_89	MTMR3	-2.38891	3.01196e-09
ENST00000265981.7-3-4_175	RNF141	5.55218	3.02127e-09
ENST00000267973.7-8-9_33	WDR61	1.09074	3.02991e-09
ENST00000264414.9-11-15_114	CUL3	-1.45265	3.03602e-09
ENST00000284637.14-6-10_4	SH3RF1	-1.88011	3.1918e-09
ENST00000504652.5-1-22_446	DCAF1	1.20386	3.20329e-09
ENST00000348165.10-7-22_9	UBE3C	-4.24313	3.30013e-09
ENST00000377190.8-13-14_45	SYVN1	-2.22129	3.33054e-09
ENST00000596358.6-2-7_15	NOSIP	-1.6175	3.37907e-09
ENST00000377524.8-2-13_1168	STAM	-1.67081	3.46695e-09
ENST00000409790.6-12-23_152	CLEC16A	3.33586	3.48986e-09
ENST00000273963.10-8-8_8	KLHL8	4.23335	3.70094e-09
ENST00000284669.2-3-5_17	KLHL41	3.79829	3.74187e-09
ENST00000324501.10-2-9_76	PSEN1	-1.13325	3.78356e-09
ENST00000356638.8-17-23_50	GANAB	1.81489	3.96304e-09
ENST00000290650.9-2-46_50	UBR1	-2.08761	4.01444e-09
ENST00000439351.5-1-9_63	DNAJB11	-1.19289	4.16885e-09
ENST00000369278.5-1-18_37	UFL1	-1.37565	4.21559e-09
ENST00000295888.9-6-64_57	WDFY3	-1.53584	4.24431e-09
ENST00000399332.6-1-41_137	HECTD1	1.08302	4.30551e-09
ENST00000256649.9-3-5_3	TRIM45	-4.37261	4.3853e-09
ENST00000358395.11-1-4_198	RNF24	3.76584	4.44664e-09
ENST00000300107.7-13-13_26	CLPX	4.1836	4.76496e-09
ENST00000358901.11-3-16_79	VCP	2.93722	4.85239e-09
ENST00000394817.7-6-8_3635	SIL1	1.95171	4.98328e-09
ENST00000358395.11-4-4_61	RNF24	1.8567	5.05068e-09
ENST00000292510.6-4-8_37	VPS28	-1.96697	5.17506e-09
ENST00000373033.6-6-7_9	TFEB	3.68809	5.31879e-09
ENST00000398246.8-6-11_67	LONRF1	-1.65609	5.39621e-09
ENST00000261537.7-2-20_61	MIB1	-5.97856	5.53252e-09
ENST00000520539.6-41-58_22	UBR5	3.0121	5.6342e-09
ENST00000299601.10-5-11_12	LEO1	1.21479	5.64487e-09
ENST00000324103.11-6-20_16	RNF31	-1.45761	5.8345e-09
ENST00000288828.9-11-12_80	WIPI2	1.84577	5.89338e-09
ENST00000595090.6-12-14_14	RUVBL2	1.54169	5.89319e-09
ENST00000644978.2-22-27_160	HECW2	1.99574	5.92553e-09
ENST00000308660.6-1-3_71	MARCHF3	-2.38367	5.97733e-09
ENST00000371199.8-2-5_22	XIAP	2.8424	6.0102e-09
ENST00000528494.5-7-16_16	ATG13	-1.13381	6.04248e-09
ENST00000263904.5-11-13_216	STAM2	4.87598	6.15493e-09
ENST00000376753.9-2-4_54	FBXO6	2.08094	6.20606e-09
ENST00000258947.8-5-11_4	CALCOCO2	-2.26272	6.53098e-09
ENST00000301281.11-8-10_15	UBXN6	-6.08263	6.60607e-09
ENST00000377524.8-13-13_422	STAM	-1.59424	6.61678e-09
ENST00000358901.11-3-16_69	VCP	-1.18887	6.7835e-09
ENST00000327697.11-9-37_28	RNF123	-1.29266	6.80282e-09
ENST00000342494.8-13-25_105	UBE3B	3.37566	6.83721e-09
ENST00000359154.7-11-22_20	WWP2	1.08259	6.88407e-09
ENST00000260970.8-5-11_105	PPIG	-4.29027	7.09593e-09
ENST00000650372.1-16-26_208	ABCB11	-2.72117	7.27749e-09
ENST00000206595.11-4-13_54	G2E3	1.74357	7.37204e-09
ENST00000264065.12-17-21_47	DNAJC10	3.84567	7.40877e-09
ENST00000261721.9-1-7_179	BTBD1	-4.94728	7.46948e-09
ENST00000394222.8-5-9_105	ARL13B	3.1632	7.52065e-09
ENST00000367435.5-13-16_510	CDC73	-1.45175	7.88439e-09
ENST00000170447.12-5-7_64	MKRN2	-1.07204	7.90638e-09
ENST00000282041.11-23-43_131	EPG5	-1.52	8.01031e-09
ENST00000544301.7-1-8_114	VIM	3.24258	8.0099e-09
ENST00000347063.9-4-8_266	RNF175	-5.39802	8.12536e-09
ENST00000317991.9-1-19_546	GRAMD1A	3.87998	8.25228e-09
ENST00000677123.1-4-15_138	PRKCSH	-1.39492	8.38108e-09
ENST00000358303.9-6-9_15	ZC3HC1	1.06076	8.49067e-09
ENST00000375254.8-69-105_27	UBR4	-2.10164	8.61113e-09
ENST00000410062.9-2-4_1226	UBE2E3	-1.59839	8.62404e-09
ENST00000356638.8-1-23_253	GANAB	1.19167	8.68344e-09
ENST00000255977.7-6-7_30	MKRN1	-3.13763	8.74864e-09
ENST00000321297.10-15-17_28	ATG16L2	2.39183	8.82144e-09
ENST00000261537.7-6-20_196	MIB1	2.4685	9.26387e-09
ENST00000327697.11-9-37_31	RNF123	2.97337	9.37799e-09
ENST00000394440.8-8-13_58	CCT4	2.08983	9.38938e-09
ENST00000675843.1-19-61_3	ATM	-4.24753	9.64812e-09
ENST00000367669.8-16-19_36	COP1	2.42497	9.97087e-09
ENST00000526995.6-1-5_100	TRAF6	-1.51975	1.03408e-08
ENST00000378372.8-7-13_1	HSPA14	-2.52916	1.10463e-08
ENST00000359774.9-6-9_2	WDSUB1	5.44843	1.12034e-08
ENST00000319715.10-15-17_8	RBBP6	2.08473	1.14638e-08
ENST00000283632.5-4-8_360	RMND5A	3.13737	1.14904e-08
ENST00000262406.10-16-18_188	RGS9	2.60317	1.15653e-08
ENST00000232978.13-8-15_23	NKTR	-1.1209	1.1857e-08
ENST00000404125.6-1-45_385	PSME4	-1.62122	1.1864e-08
ENST00000326735.13-4-28_14	ATP13A2	-3.52947	1.19276e-08
ENST00000299767.10-14-17_43	HSP90B1	-2.05883	1.20557e-08
ENST00000447648.7-18-23_48	TECPR1	4.06073	1.21716e-08
ENST00000262854.11-27-80_15	HUWE1	1.40447	1.23576e-08
ENST00000370187.8-9-13_16	BTRC	-2.22494	1.23589e-08
ENST00000579016.6-8-13_20	ENGASE	4.38788	1.25338e-08
ENST00000420175.3-2-5_36	ASB10	-1.14359	1.32431e-08
ENST00000372901.2-40-46_61	UBR2	-3.17741	1.3436e-08
ENST00000321556.5-4-7_80	PINK1	1.74742	1.34522e-08
ENST00000262455.7-3-11_26	ERP44	-1.61002	1.37219e-08
ENST00000269122.8-19-31_2	CLTC	-1.58768	1.37443e-08
ENST00000358015.8-4-9_195	RAD23B	3.54417	1.41948e-08
ENST00000292035.10-3-7_295	MED27	-1.0412	1.4326e-08
ENST00000330899.5-5-7_9	DNAJA1	6.98023	1.44893e-08
ENST00000298068.10-20-20_179	HECTD2	3.04954	1.45222e-08
ENST00000347063.9-4-8_370	RNF175	-1.25713	1.46989e-08
ENST00000226725.11-2-14_20	KLHL2	2.32176	1.5157e-08
ENST00000397292.8-1-13_425	PLAA	-2.04325	1.52601e-08
ENST00000393674.7-3-4_45	FBXO8	-1.98939	1.57014e-08
ENST00000446197.8-4-13_20	DCAF11	3.63542	1.5914e-08
ENST00000295901.9-7-7_1	PSMD6	1.70095	1.61348e-08
ENST00000316059.7-1-10_41	ZFP91	-1.80367	1.65116e-08
ENST00000348370.9-8-12_41	RNF111	-2.96716	1.65726e-08
ENST00000306627.8-2-4_1722	UBE2E1	-2.38421	1.69844e-08
ENST00000269439.12-2-7_106	RNF165	-4.95049	1.71152e-08
ENST00000348165.10-7-22_17	UBE3C	3.59147	1.73371e-08
ENST00000291900.7-14-14_244	ZER1	3.50632	1.74242e-08
ENST00000357654.9-2-21_208	BRCA1	1.68044	1.81384e-08
ENST00000221200.9-2-11_31	KCTD9	2.58467	1.84942e-08
ENST00000223321.9-4-7_14	PSMA2	-1.7147	1.8803e-08
ENST00000367602.8-6-11_273	QSOX1	-2.55016	1.88186e-08
NTC_77027	NA	2.77159	1.88751e-08
ENST00000262294.12-21-23_2	TRIM37	-1.29117	1.90192e-08
ENST00000419234.9-11-11_38	BRAP	-1.69424	1.97401e-08
ENST00000450056.7-9-16_124	CHFR	1.72008	2.01456e-08
ENST00000264926.7-4-12_56	RAD18	1.73781	2.01631e-08
ENST00000274140.10-25-25_39	MARCHF6	-1.71235	2.0669e-08
ENST00000325239.11-45-60_136	WDFY4	3.57257	2.09012e-08
ENST00000261464.10-1-9_27	TRAF5	-1.89826	2.11223e-08
ENST00000502399.7-16-17_519	MARK2	1.73148	2.11914e-08
ENST00000322122.8-4-5_97	TRIM72	3.80938	2.14553e-08
ENST00000025008.10-11-21_20	RB1CC1	2.51244	2.17169e-08
ENST00000367097.8-9-13_118	TULP4	3.66801	2.17772e-08
ENST00000375254.8-60-105_221	UBR4	2.29448	2.17957e-08
ENST00000300651.11-7-16_14	MED1	1.11116	2.28336e-08
ENST00000276893.10-10-15_27	UHRF2	-1.65737	2.29992e-08
ENST00000595090.6-11-14_95	RUVBL2	2.87531	2.30016e-08
ENST00000316059.7-1-10_188	ZFP91	-3.21925	2.3353e-08
ENST00000252108.8-18-18_22	UBE4A	-1.65932	2.3677e-08
ENST00000229268.13-13-19_100	USP5	-3.13635	2.37289e-08
ENST00000269305.9-9-9_75	TP53	2.78466	2.40631e-08
ENST00000267938.9-9-12_137	UBE2Q2	-4.21821	2.43008e-08
ENST00000262903.9-3-23_12	HACE1	2.16491	2.45807e-08
ENST00000352689.11-13-17_25	MKLN1	1.93801	2.51816e-08
ENST00000360280.8-54-71_83	VPS13A	2.58369	2.5465e-08
ENST00000374864.10-12-22_192	ITCH	-1.5665	2.55147e-08
ENST00000520539.6-51-58_40	UBR5	1.56377	2.55286e-08
ENST00000378308.7-40-43_50	USP9X	2.00048	2.57569e-08
ENST00000025008.10-16-21_283	RB1CC1	-3.93993	2.58067e-08
ENST00000376227.4-1-16_89	CCDC22	-1.49125	2.59802e-08
ENST00000399332.6-34-41_54	HECTD1	1.45205	2.62989e-08
ENST00000367669.8-2-19_103	COP1	-2.35767	2.63555e-08
ENST00000582970.5-29-66_47	RNF213	-5.55524	2.70447e-08
ENST00000356221.8-8-17_26	CDC16	-4.18235	2.75065e-08
ENST00000217740.4-1-5_835	RNF125	-2.02813	2.88556e-08
ENST00000676185.1-1-11_245	ERCC8	-5.49813	2.88703e-08
ENST00000272091.8-5-6_109	SDE2	-1.06124	2.92566e-08
ENST00000254323.6-9-12_81	ZSWIM4	3.59532	3.00196e-08
ENST00000321394.12-4-11_4	TCP1	1.80587	3.00042e-08
ENST00000263925.8-8-9_344	LNX1	2.43092	3.02521e-08
ENST00000300289.10-1-12_42	PDIA3	-4.88576	3.05335e-08
ENST00000344836.9-5-30_66	USP7	2.17135	3.12067e-08
ENST00000342494.8-22-25_267	UBE3B	3.14438	3.15969e-08
ENST00000247178.6-5-9_92	ATG14	3.32244	3.19035e-08
ENST00000209884.5-4-10_17	KLHL20	-1.14057	3.24581e-08
ENST00000256190.12-37-39_35	SBF2	-4.08775	3.28417e-08
ENST00000394520.7-6-6_40	RNF14	-2.14376	3.36815e-08
ENST00000314673.8-5-28_51	SNX14	1.83345	3.43443e-08
ENST00000395544.9-15-26_135	ULK2	2.90481	3.44308e-08
ENST00000367840.3-17-21_332	DCAF6	2.57936	3.51285e-08
ENST00000263634.8-7-8_97	ASB3	2.4403	3.54701e-08
ENST00000612750.5-10-10_6	DCAF13	1.83652	3.54848e-08
ENST00000265333.8-4-7_79	VDAC1	-1.05711	3.60585e-08
ENST00000359154.7-5-22_1346	WWP2	2.47598	3.72184e-08
ENST00000320585.11-7-10_17	CHORDC1	-2.0188	3.73583e-08
ENST00000318037.3-4-5_132	RNF168	-2.00412	3.74536e-08
ENST00000263634.8-5-8_52	ASB3	1.94327	3.82033e-08
ENST00000299563.5-4-5_622	RNF169	-1.5054	3.89663e-08
ENST00000247461.9-4-13_17	CANX	1.93353	4.02456e-08
ENST00000311269.10-5-9_568	MARCHF10	-1.76757	4.03091e-08
ENST00000242209.9-3-9_1	FKBP9	-2.99002	4.05367e-08
ENST00000592299.6-4-4_43	SPHK1	-3.32181	4.10612e-08
ENST00000389902.8-13-15_28	RNF216	-1.36834	4.25759e-08
ENST00000591916.7-1-6_34	PTGES3L	-1.63937	4.45932e-08
ENST00000677123.1-4-15_60	PRKCSH	-1.29145	4.53095e-08
ENST00000646124.2-2-20_2	LZTR1	3.03204	4.56237e-08
ENST00000329138.9-8-21_177	HGS	-4.81128	4.56602e-08
ENST00000253794.7-1-5_35	VPS25	-1.31548	4.65802e-08
ENST00000326181.11-13-19_56	TRAF7	-2.99673	4.71759e-08
ENST00000256497.9-1-11_92	EDEM1	-2.25759	4.76482e-08
ENST00000221265.8-3-13_13	PAF1	-5.62395	4.82254e-08
ENST00000389629.8-7-17_23	RTF1	-4.57093	4.90466e-08
ENST00000232978.13-6-15_3	NKTR	-1.75948	4.92836e-08
ENST00000295704.7-2-9_27	RNF25	-1.05805	4.92827e-08
ENST00000409784.8-1-5_868	RAB1A	1.18739	4.94792e-08
ENST00000263904.5-11-13_5	STAM2	-1.32004	5.01864e-08
ENST00000299767.10-2-17_25	HSP90B1	1.43097	5.12241e-08
ENST00000395686.8-7-15_24	ERO1A	-2.3281	5.15884e-08
ENST00000446197.8-8-13_7	DCAF11	-7.78211	5.22107e-08
ENST00000284637.14-10-10_108	SH3RF1	2.47639	5.26997e-08
ENST00000229268.13-9-19_32	USP5	-2.08863	5.306e-08
ENST00000650372.1-8-26_111	ABCB11	-1.17268	5.35106e-08
ENST00000298097.7-1-3_422	FBXO33	-1.45382	5.42536e-08
ENST00000319380.12-9-17_25	UBE2O	3.34886	5.42526e-08
ENST00000371322.11-8-19_43	CUL4B	-1.47911	5.786e-08
ENST00000379341.9-2-6_127	PRDX4	-2.32578	5.85287e-08
ENST00000300417.10-12-23_61	LRSAM1	1.93808	6.05415e-08
ENST00000284320.6-11-11_68	TOMM70	-2.98267	6.10339e-08
ENST00000377670.9-1-14_881	HIF3A	2.68548	6.2106e-08
NTC_76746	NA	-1.61578	6.30694e-08
ENST00000377658.8-2-3_96	KLHL21	3.05654	6.32451e-08
ENST00000378308.7-25-43_62	USP9X	-4.11236	6.33496e-08
ENST00000517970.6-8-22_4	WWP1	2.86781	6.35074e-08
ENST00000368074.6-5-11_31	DCAF8	1.12337	6.39404e-08
ENST00000230895.11-2-3_631	DAP	-2.55474	6.49085e-08
ENST00000263966.8-20-20_88	USP13	5.40903	6.49185e-08
ENST00000318006.10-20-24_7	VPS39	6.91654	6.56899e-08
ENST00000262370.12-3-16_89	MGRN1	2.29408	6.74015e-08
ENST00000231948.8-3-10_17	CRBN	1.26577	6.80915e-08
ENST00000414423.9-4-13_118	WDR26	1.66862	6.83325e-08
ENST00000284637.14-6-10_72	SH3RF1	-5.10172	6.8523e-08
ENST00000300093.9-3-9_19	PLK1	-1.74809	6.9573e-08
ENST00000604729.6-7-25_31	ZSWIM8	1.57443	7.1077e-08
ENST00000397066.9-10-16_165	CCNF	2.97775	7.12518e-08
ENST00000310942.9-3-4_61	CBX2	2.14888	7.32348e-08
ENST00000649815.2-3-12_10	AKT1	2.06109	7.53919e-08
ENST00000263734.5-8-15_29	EPAS1	2.88801	7.77173e-08
ENST00000394128.7-11-24_16	MED24	-2.75603	7.81761e-08
ENST00000359154.7-7-22_1334	WWP2	2.91596	7.87197e-08
ENST00000292363.10-4-8_27	RNF126	2.29123	7.90273e-08
ENST00000286428.7-2-5_47	VBP1	1.32782	7.93802e-08
ENST00000268148.13-3-3_199	DET1	2.8662	8.20957e-08
ENST00000351808.10-19-24_309	IFT88	-4.61713	8.38488e-08
ENST00000264079.11-13-13_1	MCOLN1	-4.57496	8.58035e-08
ENST00000369498.8-2-4_441	FUNDC2	6.12785	8.71408e-08
ENST00000517970.6-5-22_4	WWP1	1.87702	8.81992e-08
ENST00000419234.9-11-11_30	BRAP	-1.60961	8.82667e-08
ENST00000278903.11-2-9_36	EI24	2.34271	8.89894e-08
ENST00000359120.9-5-8_14	SH3RF2	1.77594	9.08488e-08
ENST00000361371.10-18-29_125	LTN1	-1.15303	9.11047e-08
ENST00000367942.4-9-15_159	ATF6	1.79612	9.19055e-08
ENST00000439351.5-1-9_3	DNAJB11	-2.16608	9.37061e-08
ENST00000264346.12-2-22_10	HERC6	3.30401	9.5001e-08
ENST00000254950.13-6-10_69	VPS4A	1.48347	9.5687e-08
ENST00000394222.8-3-9_1255	ARL13B	4.03418	9.59174e-08
ENST00000512805.6-2-7_16	RACK1	2.20549	9.60449e-08
ENST00000322157.9-8-22_1	NPEPPS	1.53748	9.6309e-08
ENST00000232766.6-2-9_83	KLHL18	-1.19211	9.78208e-08
ENST00000260947.9-6-10_311	BARD1	5.0345	9.92418e-08
ENST00000235329.10-15-16_140	MFN2	-2.971	1.00092e-07
ENST00000324439.9-7-8_3	RCHY1	-2.26375	1.00613e-07
ENST00000419743.7-7-9_26	FBXO15	-6.15867	1.01563e-07
ENST00000395544.9-19-26_13	ULK2	-4.055	1.03403e-07
ENST00000392325.9-7-9_159	WDR45B	1.79855	1.0597e-07
ENST00000252015.3-12-18_58	TRPC4AP	-2.79204	1.06368e-07
ENST00000272793.11-29-38_287	UBR3	-3.78956	1.12974e-07
ENST00000318037.3-4-5_204	RNF168	-1.33708	1.13271e-07
ENST00000216133.10-3-5_163	CBX7	-2.35857	1.13426e-07
ENST00000259605.11-8-11_22	RNF38	2.19772	1.1365e-07
ENST00000358465.7-5-19_15	TRIM33	-2.96729	1.14781e-07
ENST00000300651.11-8-16_3	MED1	2.22711	1.19712e-07
ENST00000375254.8-96-105_12	UBR4	2.48432	1.20189e-07
ENST00000274255.11-9-9_107	SKP2	3.5215	1.22899e-07
ENST00000265651.8-4-10_24	FBXO3	5.03395	1.23932e-07
ENST00000442697.7-6-7_10	DNAJB14	-1.68156	1.24774e-07
ENST00000443617.7-22-76_8	HERC1	3.57775	1.25534e-07
ENST00000300747.10-4-5_51	TRIM68	-6.18739	1.26727e-07
ENST00000262294.12-4-23_80	TRIM37	-1.05499	1.26921e-07
ENST00000471841.6-9-16_103	MFN1	-1.60306	1.27098e-07
ENST00000319394.8-5-14_212	WDTC1	1.48245	1.27223e-07
ENST00000217244.9-9-11_79	CSNK2A1	-1.80189	1.27785e-07
ENST00000228495.11-5-6_8	KCTD10	3.46988	1.28149e-07
ENST00000066544.8-4-18_414	CDC27	4.01517	1.29576e-07
ENST00000533727.5-9-16_45	AMBRA1	-1.8151	1.30512e-07
ENST00000372232.8-6-12_196	ATG4A	2.96554	1.33152e-07
ENST00000343090.11-17-27_154	UBE4B	1.57671	1.38101e-07
ENST00000272227.8-2-12_117	PDIA6	-1.06563	1.39048e-07
ENST00000366991.5-8-14_38	DTL	-1.65605	1.39489e-07
ENST00000262455.7-10-11_7	ERP44	1.29282	1.40724e-07
ENST00000358303.9-1-9_100	ZC3HC1	1.58236	1.43369e-07
ENST00000301764.12-23-26_30	DDB1	2.24938	1.44078e-07
ENST00000376573.9-2-9_22	PIP4K2A	-3.86021	1.47331e-07
ENST00000320578.3-1-1_1504	RAB39A	-2.58167	1.50167e-07
ENST00000641686.2-9-11_58	MFSD8	1.27806	1.51303e-07
ENST00000242209.9-5-9_9	FKBP9	-1.37673	1.57168e-07
ENST00000381070.8-10-13_2947	CWC27	2.75202	1.57175e-07
ENST00000264065.12-17-21_28	DNAJC10	-3.49371	1.57288e-07
ENST00000399464.7-14-28_2	NEURL4	2.3039	1.60931e-07
ENST00000322122.8-4-5_78	TRIM72	-2.03662	1.61421e-07
ENST00000604729.6-2-25_10	ZSWIM8	-2.38779	1.61888e-07
ENST00000675903.1-2-40_27	TRIP12	-1.36892	1.6411e-07
ENST00000331456.7-11-14_188	TRAIP	-2.30157	1.64617e-07
ENST00000379263.8-5-16_12	DNAJC2	-1.07153	1.69993e-07
ENST00000331456.7-10-14_231	TRAIP	-4.5441	1.72096e-07
ENST00000358935.3-1-5_769	MARCHF5	4.59121	1.74773e-07
ENST00000368309.4-2-10_33	UBQLN4	-2.08576	1.79135e-07
ENST00000262370.12-3-16_27	MGRN1	3.45165	1.81566e-07
ENST00000595090.6-11-14_206	RUVBL2	-1.6826	1.81681e-07
ENST00000361242.9-3-13_80	ATG9A	1.8751	1.82215e-07
ENST00000367942.4-10-15_289	ATF6	-1.5045	1.83593e-07
ENST00000313050.11-2-29_40	SEC16A	1.31506	1.85629e-07
ENST00000329138.9-8-21_92	HGS	3.59335	1.88737e-07
ENST00000378372.8-8-13_54	HSPA14	-1.18279	1.88513e-07
ENST00000652332.1-2-9_42	PDIA4	-1.07647	1.88632e-07
ENST00000342494.8-13-25_23	UBE3B	2.50806	1.90304e-07
ENST00000287598.11-5-22_25	BUB1B	1.8202	1.93151e-07
ENST00000261497.9-7-12_108	USP22	2.75054	1.93694e-07
ENST00000265742.8-8-18_68	ANKIB1	1.32374	1.94229e-07
ENST00000403359.8-16-22_166	FBXO11	2.81035	1.95265e-07
ENST00000371627.5-6-26_137	TNKS2	-1.56352	1.95543e-07
ENST00000396981.6-2-4_355	UBE2G1	5.51189	1.97503e-07
ENST00000307741.11-8-12_20	THOP1	1.52396	2.02861e-07
NTC_76952	NA	3.78325	2.04582e-07
ENST00000262039.9-1-24_112	PIK3C3	-1.46503	2.1128e-07
ENST00000259457.8-4-7_146	PSMB7	-3.53715	2.21079e-07
ENST00000675903.1-28-40_44	TRIP12	5.0427	2.26447e-07
ENST00000303210.9-3-8_10	GNB2	0.97551	2.36426e-07
ENST00000379263.8-6-16_34	DNAJC2	3.62033	2.37266e-07
ENST00000254950.13-6-10_29	VPS4A	-4.34128	2.41558e-07
ENST00000232564.8-3-8_110	GNB4	-3.031	2.4325e-07
ENST00000314144.10-1-13_142	CCT6B	-1.76444	2.44386e-07
ENST00000356638.8-1-23_53	GANAB	1.01548	2.45354e-07
ENST00000582693.5-2-8_87	RNF115	-1.17982	2.45576e-07
ENST00000314191.7-85-85_16	PRKDC	-2.2057	2.54459e-07
ENST00000216271.10-15-19_13	HDAC10	2.60902	2.62681e-07
ENST00000389902.8-13-15_117	RNF216	-1.023	2.64636e-07
ENST00000323557.12-7-12_65	FBXO9	3.84666	2.66731e-07
ENST00000261497.9-10-12_155	USP22	-1.31746	2.67903e-07
ENST00000378372.8-7-13_17	HSPA14	2.62524	2.68943e-07
ENST00000255977.7-5-7_45	MKRN1	-1.91496	2.70855e-07
ENST00000259339.7-3-4_17	TOR1B	-1.25936	2.71584e-07
ENST00000216225.9-4-4_86	RBX1	1.64228	2.7267e-07
ENST00000292782.9-3-6_71	DCUN1D1	-1.68203	2.727e-07
ENST00000296464.9-10-18_107	HSPA4L	-1.08426	2.74231e-07
ENST00000361756.8-4-8_252	RNF121	1.49137	2.75485e-07
ENST00000274255.11-4-9_7	SKP2	2.59992	2.77415e-07
ENST00000179259.6-1-5_156	TIGAR	-2.34412	2.78337e-07
ENST00000229268.13-8-19_55	USP5	-0.986926	2.78536e-07
ENST00000341285.8-8-10_50	FBXL5	-4.93065	2.84157e-07
ENST00000316218.12-13-16_161	PDIA5	1.85627	2.92289e-07
ENST00000270225.12-7-8_184	SAE1	-1.79888	2.96694e-07
ENST00000368074.6-4-11_105	DCAF8	-1.21946	3.07893e-07
ENST00000299767.10-2-17_33	HSP90B1	1.96106	3.12297e-07
ENST00000348165.10-10-22_89	UBE3C	-0.954793	3.12447e-07
ENST00000532097.6-1-12_42	PSMD13	-1.04267	3.1646e-07
ENST00000359568.10-45-46_8	PCNT	-3.42555	3.28046e-07
ENST00000401950.7-17-17_75	MTMR3	-3.27488	3.27908e-07
ENST00000232744.13-1-11_197	ABTB1	-1.58812	3.29805e-07
ENST00000261813.9-2-3_803	PFDN1	-1.00274	3.36473e-07
ENST00000334136.11-7-27_36	HDAC6	-2.34399	3.4e-07
ENST00000349431.11-1-5_199	UBE2J2	-5.28732	3.46583e-07
ENST00000359933.6-25-41_2	ATG2B	-6.62772	3.47937e-07
ENST00000295030.6-1-3_3	PEX13	-1.1088	3.4886e-07
ENST00000528494.5-7-16_19	ATG13	-1.88811	3.60303e-07
ENST00000318006.10-24-24_70	VPS39	-3.50138	3.71747e-07
ENST00000268719.9-5-5_135	GID4	-3.61136	3.7205e-07
ENST00000291900.7-11-14_31	ZER1	4.64445	3.77791e-07
ENST00000295688.8-6-13_30	CCT3	1.68212	3.82811e-07
ENST00000272793.11-19-38_68	UBR3	-4.51001	3.89066e-07
ENST00000367669.8-2-19_402	COP1	1.77028	3.92208e-07
ENST00000428847.3-2-4_89	FBXO43	3.78517	3.94009e-07
ENST00000284320.6-5-11_143	TOMM70	1.72875	3.96047e-07
ENST00000409757.9-11-12_830	TBC1D14	3.81786	4.07758e-07
ENST00000399464.7-8-28_4	NEURL4	-2.776	4.18844e-07
ENST00000374749.8-3-19_235	CUL2	-1.23822	4.19273e-07
ENST00000264414.9-11-15_105	CUL3	1.81885	4.20362e-07
ENST00000410062.9-1-4_43	UBE2E3	-1.58442	4.24477e-07
ENST00000649796.2-5-7_43	GNAI1	1.86645	4.31958e-07
ENST00000264346.12-20-22_65	HERC6	-3.70057	4.32461e-07
ENST00000321685.7-4-5_46	DNAJC4	1.48908	4.36069e-07
ENST00000457167.9-9-13_124	DNAJC7	-1.55661	4.40744e-07
ENST00000268058.8-2-8_1078	PML	1.40982	4.42476e-07
ENST00000267973.7-3-9_4	WDR61	-1.60055	4.45996e-07
ENST00000300107.7-13-13_22	CLPX	-1.42112	4.46073e-07
ENST00000647358.2-2-9_25	CBLC	2.246	4.46093e-07
ENST00000527733.7-23-27_4	USP47	-2.39867	4.49153e-07
ENST00000435532.7-7-28_123	NEDD4	1.88724	4.56501e-07
ENST00000367942.4-11-15_32	ATF6	-1.92699	4.57495e-07
ENST00000367097.8-9-13_80	TULP4	4.4784	4.61852e-07
ENST00000275603.9-1-13_52	CCT6A	2.11833	4.69695e-07
ENST00000009530.12-1-8_516	CD74	2.21651	4.79041e-07
ENST00000283351.10-27-28_340	TRAPPC8	-1.36242	4.82745e-07
ENST00000377534.8-27-30_189	LMO7	-2.88412	5.16391e-07
ENST00000206595.11-9-13_11	G2E3	-2.1438	5.1912e-07
ENST00000419234.9-6-11_81	BRAP	-2.5024	5.20007e-07
ENST00000319715.10-7-17_60	RBBP6	2.46157	5.21787e-07
ENST00000477973.4-3-3_22	RYBP	2.97102	5.21781e-07
ENST00000209884.5-6-10_147	KLHL20	-1.85178	5.22494e-07
ENST00000324103.11-6-20_9	RNF31	2.40195	5.24743e-07
ENST00000259605.11-10-11_39	RNF38	-3.24242	5.28776e-07
ENST00000269122.8-16-31_32	CLTC	-1.55535	5.28899e-07
ENST00000379263.8-13-16_28	DNAJC2	1.54501	5.36517e-07
ENST00000262139.10-8-12_48	WIPI1	-3.91625	5.66024e-07
ENST00000604729.6-9-25_16	ZSWIM8	2.95261	5.69204e-07
ENST00000375254.8-32-105_20	UBR4	-2.19368	5.82606e-07
ENST00000284274.5-1-6_711	OTULIN	-3.87234	5.91984e-07
ENST00000277458.5-1-5_112	ASB6	0.922603	5.9435e-07
ENST00000398831.8-1-19_50	PPIL2	2.08545	6.11172e-07
ENST00000066544.8-4-18_302	CDC27	-3.86045	6.13141e-07
ENST00000235329.10-15-16_28	MFN2	1.81544	6.15102e-07
ENST00000261537.7-6-20_124	MIB1	-3.10049	6.19517e-07
ENST00000272091.8-5-6_18	SDE2	-1.27341	6.18751e-07
ENST00000339764.6-7-7_66	DNAJB13	1.81761	6.19227e-07
ENST00000262903.9-7-23_389	HACE1	-1.74068	6.45711e-07
ENST00000300651.11-8-16_17	MED1	-2.09621	6.50481e-07
ENST00000377724.8-1-6_29	DCAF10	2.13898	6.67984e-07
ENST00000259253.11-34-40_31	UGGT1	-1.24716	6.87993e-07
ENST00000351808.10-12-24_532	IFT88	-5.00203	6.90175e-07
ENST00000299767.10-5-17_226	HSP90B1	-2.40272	6.95523e-07
ENST00000359154.7-12-22_16	WWP2	-2.11048	6.99867e-07
ENST00000367602.8-6-11_261	QSOX1	1.94458	7.01322e-07
ENST00000439977.7-5-7_26	HERPUD1	1.8952	7.28569e-07
ENST00000367679.7-5-5_5	CACYBP	-0.959867	7.5437e-07
ENST00000379341.9-2-6_142	PRDX4	-0.976492	7.55976e-07
ENST00000361367.7-19-24_9	CTR9	-1.28832	7.59952e-07
ENST00000394222.8-1-9_121	ARL13B	1.79137	7.6748e-07
ENST00000292363.10-2-8_66	RNF126	4.02812	7.70098e-07
ENST00000419743.7-4-9_5	FBXO15	-2.0628	7.72433e-07
ENST00000217244.9-1-11_148	CSNK2A1	-2.94616	7.7452e-07
ENST00000288828.9-8-12_95	WIPI2	3.39932	7.80223e-07
ENST00000621676.5-7-15_62	VPS11	-1.62211	7.80124e-07
ENST00000608443.6-3-7_65	FKBP8	1.86732	8.31106e-07
ENST00000381070.8-6-13_72	CWC27	-1.97906	8.38682e-07
ENST00000649217.2-12-16_8	MALT1	-2.18917	8.82058e-07
NTC_77422	NA	1.8795	8.93656e-07
ENST00000439977.7-6-7_88	HERPUD1	2.62162	9.04962e-07
ENST00000295213.9-4-12_267	SPATA18	3.77047	9.1365e-07
ENST00000422003.6-6-6_1115	TBCEL	1.72469	9.19233e-07
ENST00000356221.8-15-17_49	CDC16	-2.06359	9.21801e-07
ENST00000334136.11-3-27_127	HDAC6	-2.0025	9.22464e-07
ENST00000261819.8-14-16_4	ANAPC5	-1.40193	9.32012e-07
ENST00000316218.12-10-16_164	PDIA5	-3.35433	9.48568e-07
ENST00000409790.6-12-23_348	CLEC16A	-4.96424	9.54475e-07
ENST00000232744.13-1-11_123	ABTB1	-1.66525	9.6088e-07
ENST00000259963.4-2-4_48	FAM8A1	-5.48736	9.62927e-07
ENST00000261303.13-8-10_38	PSMC1	1.53191	9.67604e-07
ENST00000257548.10-12-12_4	USP30	3.11564	9.79261e-07
ENST00000313386.9-4-8_1	RMND5B	-4.26418	9.8349e-07
ENST00000252744.6-10-13_21	ZSWIM6	-3.24042	1.0079e-06
ENST00000470229.6-7-13_268	NUB1	-2.11039	1.03394e-06
ENST00000296003.9-6-18_77	MTMR14	2.91541	1.0595e-06
ENST00000377560.9-33-75_3	HECTD4	-1.75759	1.07228e-06
ENST00000287598.11-15-22_7	BUB1B	-1.31202	1.08601e-06
ENST00000341423.10-2-3_2	HMGB1	-1.71183	1.08859e-06
ENST00000357654.9-3-21_35	BRCA1	1.90264	1.09037e-06
ENST00000649796.2-5-7_90	GNAI1	2.0586	1.09116e-06
ENST00000642610.2-3-15_286	TBCE	-1.97988	1.09383e-06
ENST00000520539.6-40-58_126	UBR5	-5.5889	1.10848e-06
ENST00000393674.7-3-4_11	FBXO8	3.25103	1.11668e-06
ENST00000300651.11-16-16_67	MED1	-4.33147	1.11971e-06
ENST00000451215.6-6-8_24	ASB15	3.99966	1.11937e-06
ENST00000648994.2-1-10_1909	GAN	-1.26633	1.13191e-06
ENST00000419234.9-11-11_73	BRAP	-1.97518	1.13564e-06
ENST00000360184.10-2-77_106	DYNC1H1	-2.86002	1.13828e-06
ENST00000287598.11-15-22_31	BUB1B	-1.47139	1.14536e-06
ENST00000371244.9-5-8_71	PRKAA2	-2.94488	1.15887e-06
ENST00000275233.12-18-28_7	SHPRH	2.03727	1.1658e-06
ENST00000257548.10-1-12_337	USP30	2.8838	1.20175e-06
ENST00000315436.8-8-8_32	WSB2	2.72417	1.2129e-06
ENST00000379341.9-4-6_79	PRDX4	2.66638	1.21532e-06
ENST00000520539.6-45-58_31	UBR5	3.24781	1.24898e-06
ENST00000457167.9-1-13_939	DNAJC7	1.0358	1.26173e-06
ENST00000378747.8-7-12_50	OPTN	-1.36837	1.26777e-06
ENST00000170447.12-6-7_157	MKRN2	-2.43905	1.28168e-06
ENST00000262435.14-12-18_84	SMURF2	-4.99737	1.29494e-06
ENST00000326873.12-1-8_129	STK11	2.67281	1.30905e-06
ENST00000323037.5-3-3_149	ZNRF2	-3.00579	1.33562e-06
ENST00000504652.5-11-22_102	DCAF1	-1.03361	1.35875e-06
ENST00000356607.9-8-8_100	PEX14	-1.38078	1.3898e-06
ENST00000313601.11-5-7_21	GNAI2	-1.2903	1.40967e-06
ENST00000261537.7-12-20_649	MIB1	-1.6925	1.41602e-06
ENST00000362072.8-2-6_50	DRD2	1.71894	1.41586e-06
ENST00000232766.6-8-9_170	KLHL18	-0.927371	1.41749e-06
ENST00000083182.8-4-12_337	APPBP2	-3.95016	1.42155e-06
ENST00000229264.8-3-8_3	GNB3	-7.98721	1.42309e-06
ENST00000377524.8-2-13_135	STAM	2.33558	1.44051e-06
ENST00000083182.8-4-12_155	APPBP2	-1.7563	1.45817e-06
ENST00000343090.11-22-27_87	UBE4B	-3.14378	1.45992e-06
ENST00000277458.5-1-5_31	ASB6	-1.71414	1.48229e-06
ENST00000335877.11-3-6_522	PSMF1	-1.58525	1.48356e-06
ENST00000335325.9-3-3_138	ZNRF1	-0.966531	1.50017e-06
ENST00000301764.12-17-26_7	DDB1	-1.32939	1.53112e-06
ENST00000356638.8-17-23_18	GANAB	-0.991596	1.53533e-06
ENST00000290541.7-2-6_39	PSMB4	1.73705	1.54289e-06
ENST00000327697.11-34-37_521	RNF123	-1.88897	1.56891e-06
ENST00000247461.9-8-13_14	CANX	3.86536	1.58187e-06
ENST00000299601.10-7-11_15	LEO1	-1.55317	1.63284e-06
ENST00000354449.7-7-17_63	ATG7	2.01826	1.65586e-06
ENST00000613397.4-2-7_38	BIRC2	-1.63709	1.65753e-06
ENST00000378609.9-6-8_97	GNB1	1.72816	1.66038e-06
ENST00000244061.6-3-5_4	RNF114	-6.02742	1.66998e-06
ENST00000309428.10-3-8_32	RETREG3	-3.74665	1.70076e-06
ENST00000265742.8-1-18_176	ANKIB1	6.78963	1.75454e-06
ENST00000359933.6-36-41_171	ATG2B	2.47686	1.77294e-06
ENST00000231948.8-9-10_22	CRBN	-1.81658	1.79901e-06
ENST00000233741.9-2-13_84	FANCL	-1.96239	1.8105e-06
ENST00000367519.9-2-3_716	EPM2A	1.16167	1.82511e-06
ENST00000356136.8-6-14_405	UVRAG	3.31357	1.82692e-06
ENST00000409749.7-3-5_211	ASB18	3.89672	1.88444e-06
ENST00000254101.4-2-6_24	PRKAB2	-2.14193	1.89905e-06
ENST00000313601.11-2-7_42	GNAI2	-1.45429	1.89889e-06
ENST00000310528.9-8-12_56	SUGT1	6.86409	1.96208e-06
ENST00000397066.9-10-16_251	CCNF	2.29836	1.96637e-06
ENST00000376734.4-4-7_3	TRIM31	-1.02159	1.99325e-06
ENST00000267938.9-7-12_4	UBE2Q2	-2.74283	2.01209e-06
ENST00000262294.12-12-23_89	TRIM37	-2.46247	2.01586e-06
ENST00000295030.6-1-3_341	PEX13	-2.08405	2.03264e-06
ENST00000528494.5-7-16_11	ATG13	-2.53763	2.04159e-06
ENST00000309033.5-5-5_140	UBXN2A	-1.4697	2.04525e-06
ENST00000370558.8-7-8_394	SH3GLB1	-1.39237	2.08412e-06
ENST00000568000.6-4-5_71	KCTD13	3.18986	2.09194e-06
ENST00000262435.14-15-18_104	SMURF2	2.27529	2.11682e-06
ENST00000350612.11-9-24_78	SUPT20H	0.888645	2.15856e-06
ENST00000652555.1-8-10_594	FBXW8	1.80083	2.16143e-06
ENST00000283351.10-10-28_128	TRAPPC8	2.83485	2.18646e-06
ENST00000325617.10-2-13_20	CLGN	2.08947	2.19134e-06
ENST00000369498.8-2-4_292	FUNDC2	-1.00564	2.19366e-06
ENST00000286788.9-8-14_44	CCT8	-1.13963	2.20818e-06
ENST00000596731.7-3-3_10	WDR83OS	1.45657	2.24663e-06
ENST00000299601.10-8-11_85	LEO1	-2.53927	2.26153e-06
ENST00000590996.6-18-19_22	NBR1	1.54278	2.28451e-06
ENST00000269260.7-10-14_22	ARRB2	2.41014	2.29578e-06
ENST00000343090.11-9-27_5	UBE4B	-1.24422	2.31373e-06
ENST00000382564.8-4-5_19	DNAJC19	3.48268	2.36444e-06
ENST00000371199.8-2-5_7	XIAP	-2.66048	2.37363e-06
ENST00000314191.7-51-85_72	PRKDC	2.10618	2.41086e-06
ENST00000235150.5-3-8_24	RNF19B	2.65103	2.45409e-06
ENST00000298910.12-3-50_6	LRRK2	1.75897	2.45812e-06
ENST00000359154.7-7-22_241	WWP2	-1.48105	2.49781e-06
ENST00000171111.10-2-4_8	KEAP1	2.3679	2.49934e-06
ENST00000274255.11-1-9_5	SKP2	-1.2532	2.51022e-06
ENST00000579016.6-10-13_25	ENGASE	3.06896	2.59261e-06
ENST00000368003.6-2-5_19	UFC1	-1.3805	2.6164e-06
ENST00000265062.8-1-4_128	RAB7A	-1.85672	2.66005e-06
ENST00000435532.7-7-28_16	NEDD4	1.59782	2.66772e-06
ENST00000372901.2-45-46_24	UBR2	-1.73082	2.70345e-06
ENST00000420843.7-7-15_251	ARRB1	-1.86794	2.75833e-06
ENST00000232766.6-8-9_89	KLHL18	-1.35275	2.88149e-06
ENST00000290649.10-7-13_79	AMFR	1.60093	2.91488e-06
ENST00000359154.7-7-22_956	WWP2	1.06451	2.97799e-06
ENST00000269260.7-11-14_96	ARRB2	-1.36562	2.99666e-06
ENST00000274140.10-17-25_91	MARCHF6	-1.4612	3.03359e-06
ENST00000272227.8-6-12_10	PDIA6	-1.85586	3.07871e-06
ENST00000318037.3-4-5_240	RNF168	-0.952727	3.10565e-06
ENST00000495893.7-1-14_102	PHC3	-1.32345	3.1996e-06
ENST00000287025.4-3-6_13	MTERF3	-1.65124	3.20934e-06
ENST00000394128.7-18-24_217	MED24	3.72874	3.24506e-06
ENST00000277458.5-1-5_228	ASB6	-0.968181	3.29509e-06
ENST00000300651.11-8-16_22	MED1	2.00349	3.31267e-06
ENST00000429979.6-7-12_87	RUBCNL	-2.23919	3.3124e-06
ENST00000418476.2-11-19_30	UNC45A	0.997537	3.35515e-06
ENST00000209884.5-4-10_97	KLHL20	1.68124	3.44844e-06
ENST00000608443.6-3-7_34	FKBP8	-1.58381	3.46447e-06
ENST00000369244.7-1-6_112	FBXL4	-0.886972	3.5154e-06
ENST00000356401.9-2-13_4	ARIH2	-1.43744	3.59027e-06
ENST00000331272.9-5-8_3282	FBXW4	-1.44159	3.62068e-06
ENST00000262843.11-9-9_17	MID2	3.02156	3.63036e-06
ENST00000200181.8-11-38_65	ITGB4	-3.6168	3.64204e-06
ENST00000368074.6-5-11_308	DCAF8	1.468	3.67971e-06
ENST00000356840.8-3-6_64	MYLIP	-4.68439	3.77852e-06
ENST00000295688.8-6-13_18	CCT3	1.42634	3.8791e-06
ENST00000377560.9-15-75_33	HECTD4	-1.43759	3.91493e-06
ENST00000343526.9-13-18_11	TRIM24	4.40727	3.93724e-06
ENST00000254337.10-10-12_13	DCAF15	-2.93173	4.00188e-06
ENST00000320585.11-4-10_104	CHORDC1	-1.78977	4.01595e-06
ENST00000259253.11-31-40_14	UGGT1	-4.5944	4.04736e-06
ENST00000354911.9-11-13_37	WAC	-1.05922	4.11301e-06
ENST00000389851.10-9-12_358	UVSSA	-2.67988	4.11388e-06
ENST00000217740.4-1-5_157	RNF125	-2.00643	4.14498e-06
ENST00000215071.8-3-6_113	PSMD8	1.25314	4.1789e-06
ENST00000283632.5-6-8_101	RMND5A	1.79954	4.2633e-06
ENST00000639579.1-3-12_36	ATG9B	2.2149	4.26278e-06
ENST00000394222.8-5-9_75	ARL13B	2.72189	4.28921e-06
ENST00000244061.6-1-5_87	RNF114	-1.84645	4.33667e-06
ENST00000371322.11-8-19_36	CUL4B	-2.12771	4.34225e-06
ENST00000370187.8-6-13_216	BTRC	-1.34782	4.38982e-06
ENST00000313050.11-2-29_160	SEC16A	1.78427	4.49214e-06
ENST00000338700.10-4-11_19	TRIM2	-4.6067	4.49543e-06
ENST00000320585.11-7-10_9	CHORDC1	-1.68109	4.52938e-06
ENST00000435532.7-9-28_9	NEDD4	-1.1666	4.54203e-06
ENST00000399598.7-5-7_108	UBXN2B	-5.49177	4.57633e-06
ENST00000648817.1-2-11_92	DNAJC21	2.19384	4.59011e-06
ENST00000261837.12-8-11_195	GNB5	-0.854277	4.69813e-06
ENST00000444643.7-6-7_25	DNAJB12	-0.88987	4.70288e-06
ENST00000265339.7-1-5_100	UBE2B	-1.76158	4.73954e-06
ENST00000650932.1-3-15_21	UHRF1	3.18956	4.80521e-06
ENST00000446818.6-8-20_6	TBC1D5	4.18578	4.83721e-06
ENST00000557658.6-9-18_71	VIPAS39	1.5427	4.85954e-06
ENST00000376052.5-25-29_147	TPP2	2.37981	4.90337e-06
ENST00000321297.10-7-17_176	ATG16L2	-1.81861	4.96731e-06
ENST00000423759.6-37-37_169	TAF1	-1.32411	5.02967e-06
ENST00000274773.12-4-6_8	TRIM7	2.44369	5.04731e-06
ENST00000345851.8-3-10_14	TRIM3	-1.31784	5.10436e-06
ENST00000375255.8-10-13_135	DCAF17	2.03007	5.13597e-06
ENST00000358377.7-4-12_153	DCAF4	-2.8187	5.1849e-06
ENST00000262406.10-14-18_20	RGS9	2.70678	5.20166e-06
ENST00000337138.9-6-14_22	HIF1A	2.39	5.21893e-06
ENST00000258947.8-5-11_32	CALCOCO2	1.44789	5.3357e-06
ENST00000333371.8-3-22_14	VPS33B	1.2174	5.39942e-06
ENST00000392017.9-17-17_74	ATG16L1	1.61717	5.4077e-06
ENST00000262294.12-3-23_11	TRIM37	2.12526	5.41695e-06
ENST00000541212.6-5-5_37	PSMD9	-1.56691	5.48578e-06
ENST00000262177.9-1-8_214	DNAJB6	-1.04748	5.51957e-06
ENST00000262406.10-16-18_171	RGS9	-2.67765	5.53139e-06
ENST00000295030.6-1-3_65	PEX13	-1.45076	5.56916e-06
ENST00000317991.9-17-19_41	GRAMD1A	-1.48431	5.59365e-06
ENST00000357244.7-8-19_403	RC3H2	-1.33948	5.83227e-06
ENST00000377560.9-25-75_56	HECTD4	-1.35825	5.88342e-06
ENST00000280700.10-5-11_40	NGLY1	-4.96481	5.89648e-06
ENST00000225728.8-3-3_132	MED31	1.38078	6.07215e-06
ENST00000358377.7-4-12_103	DCAF4	-1.08066	6.14925e-06
ENST00000325222.9-10-20_23	CUL1	2.30924	6.18828e-06
ENST00000298910.12-48-50_49	LRRK2	2.42807	6.33024e-06
ENST00000325954.9-3-16_7	RNF10	-1.67766	6.45556e-06
ENST00000373700.9-6-22_117	HERC4	2.55196	6.60864e-06
ENST00000359154.7-7-22_1391	WWP2	1.796	6.63405e-06
ENST00000379341.9-4-6_30	PRDX4	-1.35184	6.68153e-06
ENST00000369847.4-6-9_302	PCGF6	-0.885553	6.71047e-06
ENST00000375254.8-33-105_9	UBR4	1.63339	6.77045e-06
ENST00000361368.7-9-17_94	SMURF1	3.11601	6.85131e-06
ENST00000315368.8-26-27_51	ANAPC4	1.46378	6.88235e-06
ENST00000399017.6-41-44_32	TTC3	-1.96965	7.07376e-06
ENST00000612750.5-8-10_55	DCAF13	2.86988	7.10402e-06
ENST00000545606.6-4-14_80	CAND1	-3.6157	7.25632e-06
ENST00000355528.9-20-38_70	TBCD	-2.84485	7.46334e-06
ENST00000357654.9-1-21_95	BRCA1	1.116	7.46972e-06
ENST00000295688.8-10-13_149	CCT3	4.47158	7.70497e-06
ENST00000521389.6-8-8_567	RNF130	-1.90597	7.77908e-06
ENST00000296933.10-4-11_5	FBXW11	-1.44164	7.86468e-06
ENST00000394420.9-13-13_110	RSPRY1	1.62475	7.86747e-06
ENST00000264926.7-6-12_28	RAD18	-1.37978	7.88829e-06
ENST00000369847.4-3-9_12	PCGF6	1.35375	7.88981e-06
ENST00000369454.4-1-1_128	RAB39B	3.26702	7.95847e-06
ENST00000336576.10-1-7_62	DNAJB2	-1.89975	7.98108e-06
ENST00000324460.7-4-7_2	HSPA5	-2.6745	8.01738e-06
ENST00000296003.9-14-18_97	MTMR14	2.30974	8.04374e-06
ENST00000321297.10-14-17_60	ATG16L2	4.98493	8.10575e-06
ENST00000403359.8-21-22_22	FBXO11	-3.55664	8.10936e-06
ENST00000371199.8-2-5_29	XIAP	2.74561	8.13035e-06
ENST00000244061.6-3-5_25	RNF114	-1.57195	8.15482e-06
ENST00000453744.7-6-6_74	UBE2D3	-1.59029	8.191e-06
ENST00000354619.10-12-15_13	ERO1B	-2.56074	8.20211e-06
ENST00000229328.10-2-6_12	PRKAB1	-1.37034	8.33043e-06
ENST00000374864.10-8-22_13	ITCH	-0.827718	8.41872e-06
ENST00000382292.9-1-8_1088	SACS	1.32776	8.46283e-06
ENST00000379263.8-13-16_12	DNAJC2	-1.56858	8.49029e-06
ENST00000374864.10-12-22_180	ITCH	1.29782	8.6593e-06
ENST00000286428.7-2-5_228	VBP1	3.4075	8.6661e-06
ENST00000335877.11-6-6_3	PSMF1	1.88533	8.88859e-06
ENST00000298097.7-1-3_698	FBXO33	-5.06077	8.90783e-06
ENST00000258534.13-1-6_252	DRAM1	-4.81333	8.92482e-06
ENST00000648336.2-1-10_84	UBE3A	-2.07349	8.94619e-06
ENST00000254436.8-4-5_40	TRIM21	1.00086	8.96411e-06
ENST00000417314.2-2-3_109	KBTBD8	-1.9234	9.02056e-06
ENST00000323557.12-5-12_93	FBXO9	-1.27696	9.07002e-06
ENST00000298068.10-8-20_14	HECTD2	2.5225	9.11645e-06
ENST00000262177.9-6-8_21	DNAJB6	-0.988234	9.16227e-06
ENST00000457167.9-1-13_155	DNAJC7	-1.35163	9.16233e-06
ENST00000648817.1-8-11_9	DNAJC21	-2.07411	9.41245e-06
ENST00000312838.9-3-5_9	RNF166	-2.0805	9.45781e-06
ENST00000350302.8-1-8_117	FBXO25	1.26417	9.49154e-06
ENST00000267199.9-3-12_38	VPS33A	-6.94218	9.51003e-06
ENST00000457167.9-1-13_93	DNAJC7	-0.971911	9.55337e-06
ENST00000394817.7-6-8_3123	SIL1	-1.35217	9.63942e-06
ENST00000376980.8-3-11_24	DNAJC1	-4.86041	9.67983e-06
ENST00000265686.8-4-18_30	TCIRG1	-3.2993	9.72094e-06
ENST00000520539.6-1-58_1776	UBR5	1.45587	9.72005e-06
ENST00000375254.8-18-105_6	UBR4	-3.88269	9.90578e-06
ENST00000455511.7-1-10_191	ANAPC7	1.63425	9.9299e-06
ENST00000424310.7-5-9_24	RNF145	-0.950036	9.93892e-06
ENST00000262193.7-1-5_138	PSMB1	-1.74784	9.96596e-06
ENST00000590996.6-7-19_23	NBR1	2.87564	1.00364e-05
ENST00000274140.10-2-25_30	MARCHF6	1.08688	1.02532e-05
ENST00000424310.7-5-9_110	RNF145	-2.16464	1.02872e-05
ENST00000675903.1-18-40_1	TRIP12	-1.63029	1.03213e-05
ENST00000321685.7-1-5_58	DNAJC4	1.94392	1.03713e-05
ENST00000310301.9-15-28_102	VPS41	3.77082	1.05782e-05
ENST00000252050.9-11-39_5	CUL9	-1.94413	1.05948e-05
ENST00000468812.6-4-4_12	PPIA	2.27844	1.06405e-05
ENST00000334136.11-17-27_36	HDAC6	-3.30637	1.06618e-05
ENST00000296343.10-1-19_504	RUBCN	-3.52872	1.07372e-05
ENST00000378444.9-1-13_135	BCOR	-2.26367	1.08267e-05
ENST00000261837.12-8-11_72	GNB5	1.70648	1.09139e-05
ENST00000158771.9-6-6_217	DERL2	-1.85058	1.09485e-05
ENST00000247668.7-1-9_47	TRAF2	-1.30211	1.0956e-05
ENST00000328879.9-1-5_427	KLHL22	-3.81928	1.09665e-05
ENST00000316059.7-10-10_13	ZFP91	-1.29805	1.1084e-05
ENST00000675843.1-21-61_61	ATM	-2.00504	1.10907e-05
ENST00000347063.9-2-8_118	RNF175	-1.45491	1.15445e-05
ENST00000422003.6-3-6_5	TBCEL	1.38393	1.17447e-05
ENST00000541212.6-5-5_22	PSMD9	-1.89174	1.17782e-05
ENST00000376052.5-27-29_448	TPP2	-3.25416	1.20097e-05
ENST00000291900.7-12-14_80	ZER1	2.29272	1.20494e-05
ENST00000324849.9-6-11_87	VPS37A	-3.4982	1.20474e-05
ENST00000311635.12-6-8_90	FBXO31	-1.78702	1.20772e-05
ENST00000317089.10-3-8_89	DNAJA2	-1.12262	1.21039e-05
ENST00000403888.7-8-8_13	KCTD17	-4.92633	1.22572e-05
ENST00000334696.11-7-12_18	ENTPD5	-1.72691	1.24716e-05
ENST00000448984.1-4-5_1	TRIM49C	2.1517	1.24835e-05
ENST00000232461.8-4-7_2	GNAT1	-2.62937	1.28994e-05
ENST00000359154.7-17-22_38	WWP2	1.35646	1.3171e-05
ENST00000399017.6-3-44_16	TTC3	2.33275	1.32344e-05
ENST00000251968.4-6-9_29	TSG101	5.81689	1.32465e-05
ENST00000651528.2-28-41_39	DEPDC5	-1.41718	1.37413e-05
ENST00000360184.10-52-77_6	DYNC1H1	-1.32466	1.4298e-05
ENST00000379341.9-4-6_7	PRDX4	-1.22808	1.43132e-05
ENST00000263228.4-3-4_453	UBE2R2	-4.23523	1.44505e-05
ENST00000366481.4-4-5_2	TRIM58	-1.60499	1.44726e-05
ENST00000262435.14-18-18_15	SMURF2	1.59164	1.45146e-05
ENST00000252108.8-18-18_82	UBE4A	1.28942	1.47446e-05
ENST00000287598.11-5-22_81	BUB1B	-1.30589	1.48868e-05
ENST00000418476.2-9-19_37	UNC45A	-3.41684	1.49019e-05
ENST00000376692.9-4-7_31	MAD2L2	-1.30605	1.50844e-05
ENST00000354287.5-4-5_56	FBXO2	-2.36946	1.51549e-05
ENST00000675855.1-12-14_12	PEX5	-3.19468	1.52261e-05
ENST00000300651.11-11-16_36	MED1	2.45705	1.53017e-05
ENST00000394420.9-13-13_100	RSPRY1	1.38345	1.53298e-05
ENST00000400345.8-2-30_4905	NEDD4L	-3.14501	1.54096e-05
ENST00000260247.10-4-7_423	DCUN1D5	1.64899	1.54581e-05
ENST00000322244.10-1-32_205	UBA6	-2.95152	1.556e-05
ENST00000344836.9-23-30_14	USP7	-1.45828	1.56712e-05
ENST00000262294.12-3-23_52	TRIM37	-3.31017	1.58188e-05
ENST00000264414.9-11-15_121	CUL3	-3.07896	1.58674e-05
ENST00000320585.11-7-10_30	CHORDC1	-1.44533	1.60066e-05
ENST00000401950.7-17-17_98	MTMR3	-2.7763	1.61677e-05
ENST00000409785.9-6-6_66	KCMF1	-1.97235	1.61763e-05
ENST00000296343.10-17-19_56	RUBCN	-6.28625	1.62362e-05
ENST00000454077.6-3-11_23	ATXN7L3	-6.46111	1.62467e-05
ENST00000392017.9-4-17_100	ATG16L1	1.38102	1.62826e-05
ENST00000242209.9-5-9_37	FKBP9	1.13458	1.64521e-05
NTC_76949	NA	-0.9367	1.65265e-05
ENST00000262455.7-3-11_317	ERP44	-1.6396	1.66043e-05
ENST00000219473.12-6-13_15	USP10	-2.5817	1.66208e-05
ENST00000359933.6-38-41_22	ATG2B	1.1066	1.68272e-05
ENST00000314144.10-5-13_298	CCT6B	3.1255	1.68788e-05
ENST00000557658.6-11-18_83	VIPAS39	-1.85853	1.69047e-05
ENST00000435532.7-19-28_28	NEDD4	-5.14666	1.69292e-05
ENST00000369278.5-13-18_9	UFL1	1.7647	1.72008e-05
ENST00000433386.7-5-6_45	HSPBP1	1.47079	1.72156e-05
ENST00000265686.8-4-18_45	TCIRG1	-6.76905	1.72971e-05
ENST00000435041.3-5-7_54	UBE2J1	1.38984	1.73893e-05
ENST00000646124.2-2-20_297	LZTR1	-1.59106	1.75231e-05
ENST00000326873.12-5-8_80	STK11	4.63951	1.76622e-05
ENST00000324103.11-6-20_23	RNF31	-1.1762	1.8236e-05
ENST00000320585.11-4-10_87	CHORDC1	2.03086	1.84641e-05
ENST00000527733.7-5-27_163	USP47	-3.60766	1.84695e-05
ENST00000378747.8-11-12_34	OPTN	-0.825182	1.86921e-05
ENST00000262039.9-11-24_80	PIK3C3	0.962164	1.87744e-05
ENST00000323037.5-3-3_268	ZNRF2	-1.13886	1.87787e-05
ENST00000393359.7-4-10_379	TGFBRAP1	-1.06302	1.88515e-05
ENST00000225726.10-8-11_93	CCDC47	0.938467	1.89251e-05
ENST00000399332.6-37-41_27	HECTD1	1.58349	1.90341e-05
ENST00000238497.10-8-10_34	VPS4B	-1.45207	1.94996e-05
ENST00000392017.9-14-17_129	ATG16L1	0.840509	1.95959e-05
ENST00000343526.9-5-18_72	TRIM24	-1.63092	1.99562e-05
ENST00000354287.5-4-5_27	FBXO2	-1.28797	1.99772e-05
ENST00000263228.4-3-4_253	UBE2R2	-3.01533	1.99936e-05
ENST00000303400.9-7-8_74	MAEA	-1.40853	2.01936e-05
ENST00000232978.13-11-15_80	NKTR	1.46395	2.03242e-05
ENST00000232978.13-14-15_33	NKTR	-1.96951	2.03265e-05
ENST00000287878.9-10-15_87	PRKAG2	-3.18271	2.04104e-05
ENST00000317991.9-16-19_56	GRAMD1A	2.44522	2.04395e-05
ENST00000257118.5-11-13_139	PHC2	-4.85276	2.07006e-05
ENST00000376692.9-4-7_132	MAD2L2	-4.31256	2.07059e-05
ENST00000259253.11-28-40_55	UGGT1	-1.42256	2.07425e-05
ENST00000354911.9-13-13_53	WAC	2.77666	2.07951e-05
ENST00000379540.8-23-23_157	NFX1	-1.97599	2.07937e-05
ENST00000619920.4-10-11_68	PSMC3	1.58265	2.14892e-05
ENST00000358757.5-2-5_211	UBE2W	1.34672	2.15492e-05
ENST00000216271.10-2-19_37	HDAC10	-0.878841	2.15696e-05
ENST00000331272.9-6-8_1412	FBXW4	-1.68337	2.15909e-05
ENST00000369847.4-3-9_32	PCGF6	-1.13415	2.18537e-05
ENST00000432825.7-9-9_267	FBXO10	-1.2649	2.18622e-05
ENST00000446818.6-2-20_226	TBC1D5	2.7261	2.18727e-05
ENST00000262854.11-46-80_89	HUWE1	-2.92117	2.19507e-05
ENST00000309033.5-4-5_39	UBXN2A	1.39094	2.21799e-05
ENST00000359568.10-39-46_124	PCNT	1.58062	2.23922e-05
ENST00000319172.10-4-7_239	TMEM39A	-2.66593	2.2978e-05
ENST00000440928.6-12-16_7	RGS7	-2.59751	2.3116e-05
ENST00000301764.12-23-26_11	DDB1	1.19857	2.31591e-05
ENST00000319715.10-16-17_5	RBBP6	-1.19912	2.33992e-05
ENST00000300289.10-5-12_103	PDIA3	1.51978	2.34171e-05
ENST00000248566.3-2-2_162	SEM1	-1.89102	2.34523e-05
ENST00000216455.9-8-10_42	PSMA3	-3.9719	2.37102e-05
ENST00000317991.9-16-19_50	GRAMD1A	-1.62542	2.3816e-05
[truncated: 4,637 more rows]

## Sheet: Table S2
Table S2. Ranked list of sgRNAs with most significant effects on cell viability after induced proximity. sgRNA naming structure follows: transcript _ targeted intron # _ total # of introns _ sgRNA #.
sgRNA	Gene	logFC	PValue
ENST00000414423.9-6-13_194	WDR26	-2.8572	3.73963e-14
ENST00000011619.6-2-13_1098	RANBP9	-0.337976	3.89533e-08
ENST00000414423.9-6-13_131	WDR26	-0.80617	1.11481e-06
ENST00000414423.9-6-13_107	WDR26	-3.95755	4.34049e-06
ENST00000361756.8-5-8_52	RNF121	0.723066	1.44985e-05
ENST00000261789.9-4-4_44	TM9SF1	-1.44556	2.1937e-05
ENST00000310053.10-3-24_37	HLTF	-0.712519	2.54542e-05
ENST00000307142.9-2-4_17	SYNPO2	-0.264918	0.000314236
ENST00000283351.10-10-28_116	TRAPPC8	-2.94228	0.000423879
ENST00000376980.8-3-11_24	DNAJC1	1.62177	0.000449132
ENST00000217244.9-9-11_79	CSNK2A1	-0.642801	0.000514427
ENST00000338700.10-2-11_288	TRIM2	-0.550985	0.000547285
ENST00000216879.8-7-8_109	NSFL1C	0.427096	0.00195528
ENST00000221566.7-8-9_67	SGTA	0.7706	0.00126532
ENST00000260947.9-6-10_632	BARD1	-2.81607	0.00143133
ENST00000262854.11-46-80_146	HUWE1	-2.21421	0.000880636
ENST00000290541.7-1-6_1	PSMB4	-2.65811	0.00190165
ENST00000308284.10-3-24_108	SEC16B	-0.872637	0.00174871
ENST00000315962.9-2-9_289	TRIM55	-2.57323	0.00155071
ENST00000336126.6-2-8_212	PCGF5	-0.256433	0.00108142
ENST00000343526.9-5-18_29	TRIM24	0.941576	0.00171064
ENST00000348165.10-5-22_249	UBE3C	1.06928	0.00175348
ENST00000360184.10-23-77_44	DYNC1H1	-2.32983	0.00167333
ENST00000372457.9-2-6_53	MED8	0.909241	0.0011872
ENST00000373887.8-1-6_142	TRAF1	-0.79866	0.00194057
ENST00000379887.9-13-13_48	ARIH1	-1.43444	0.00137586
ENST00000402738.6-10-23_175	HERC3	-0.54161	0.00164269
ENST00000441788.7-5-12_15	FZR1	0.525208	0.00179706
ENST00000504102.6-8-8_96	SPOP	-0.610933	0.00185927
ENST00000579016.6-3-13_148	ENGASE	2.8753	0.00103747
ENST00000621676.5-5-15_26	VPS11	2.05376	0.0014958
ENST00000263734.5-6-15_605	EPAS1	-0.682503	0.00205057
ENST00000342494.8-7-25_299	UBE3B	1.31477	0.00208851
ENST00000319394.8-3-14_12	WDTC1	-1.33721	0.002263
ENST00000265742.8-6-18_304	ANKIB1	-1.26877	0.00244613
ENST00000429979.6-10-12_189	RUBCNL	1.41035	0.0025087
ENST00000231368.10-2-17_192	LNPEP	-0.503632	0.00294951
ENST00000263904.5-2-13_35	STAM2	0.544469	0.00286651
ENST00000335877.11-5-6_104	PSMF1	-0.356886	0.00291351
ENST00000591916.7-1-6_65	PTGES3L	0.287579	0.00269077
ENST00000648336.2-9-10_711	UBE3A	2.75884	0.00275385
ENST00000504102.6-8-8_69	SPOP	-0.487616	0.00310155
ENST00000260970.8-5-11_204	PPIG	0.69089	0.00326656
ENST00000298068.10-20-20_179	HECTD2	-0.527049	0.0032436
ENST00000262139.10-7-12_49	WIPI1	-2.33919	0.00343023
ENST00000348370.9-7-12_48	RNF111	-0.598513	0.00336037
ENST00000216271.10-16-19_38	HDAC10	-0.816695	0.00377373
ENST00000342494.8-1-25_2	UBE3B	1.31242	0.00376025
ENST00000300417.10-15-23_177	LRSAM1	-0.440568	0.00414086
ENST00000317506.8-10-13_18	RANBP10	1.36687	0.00423225
ENST00000354449.7-9-17_20	ATG7	-1.94648	0.00423145
ENST00000409790.6-12-23_348	CLEC16A	1.54031	0.00429454
ENST00000495893.7-1-14_124	PHC3	-0.258821	0.00428172
ENST00000219473.12-6-13_15	USP10	-0.855685	0.00497465
ENST00000263966.8-8-20_297	USP13	-2.2809	0.00510133
ENST00000310430.11-25-26_17	TNKS	-2.1627	0.00469265
ENST00000314673.8-16-28_9	SNX14	1.85875	0.00507347
ENST00000326873.12-2-8_68	STK11	-1.59324	0.00489221
ENST00000375254.8-102-105_78	UBR4	0.682571	0.00472989
ENST00000388968.8-6-10_92	HSPD1	2.44537	0.00472838
ENST00000676185.1-7-11_98	ERCC8	-0.369461	0.00488806
ENST00000394030.8-3-17_127	CBLB	-1.07886	0.00520695
ENST00000262394.7-6-8_11	WSB1	-1.70633	0.00539956
ENST00000314144.10-8-13_10	CCT6B	-0.642495	0.00555251
ENST00000401950.7-17-17_75	MTMR3	0.743051	0.00544495
ENST00000642610.2-3-15_243	TBCE	0.998569	0.00548305
ENST00000216879.8-2-8_205	NSFL1C	0.705738	0.00576557
ENST00000256190.12-7-39_42	SBF2	-2.2814	0.00661004
ENST00000265651.8-2-10_90	FBXO3	0.518047	0.00604143
ENST00000316218.12-13-16_161	PDIA5	-0.524309	0.0058288
ENST00000319394.8-5-14_216	WDTC1	2.36569	0.00631231
ENST00000334136.11-17-27_36	HDAC6	1.15366	0.00659733
ENST00000355528.9-12-38_253	TBCD	-0.325699	0.00657478
ENST00000356221.8-11-17_92	CDC16	-1.51138	0.00648094
ENST00000358377.7-7-12_115	DCAF4	-0.337317	0.00606476
ENST00000381070.8-8-13_27	CWC27	1.76445	0.00665358
ENST00000608443.6-3-7_53	FKBP8	-0.536989	0.00667566
ENST00000652332.1-2-9_97	PDIA4	1.7852	0.00630922
ENST00000264926.7-11-12_148	RAD18	0.408818	0.00744829
ENST00000313221.8-13-17_18	FBXL13	-0.699326	0.00749941
ENST00000256190.12-24-39_140	SBF2	2.37085	0.00782055
ENST00000377524.8-2-13_990	STAM	1.1337	0.00793648
ENST00000392017.9-17-17_74	ATG16L1	-0.42612	0.00789479
ENST00000398291.4-4-7_79	GNAT3	1.22572	0.00770198
ENST00000262435.14-15-18_76	SMURF2	2.51473	0.00825608
ENST00000315368.8-26-27_32	ANAPC4	-2.44111	0.00822818
ENST00000025008.10-4-21_14	RB1CC1	2.47416	0.00839994
ENST00000232766.6-5-9_59	KLHL18	0.636356	0.00882251
ENST00000298068.10-10-20_33	HECTD2	1.41186	0.00890202
ENST00000394420.9-13-13_136	RSPRY1	-1.23109	0.00895605
ENST00000403359.8-21-22_4	FBXO11	-2.10634	0.00904792
ENST00000265651.8-2-10_83	FBXO3	-0.72785	0.00926188
ENST00000380377.9-1-3_1386	TBCA	0.600401	0.00926078
ENST00000296343.10-1-19_504	RUBCN	0.697835	0.00943429
ENST00000216218.8-1-11_217	ST13	-0.996967	0.00955185
ENST00000319172.10-6-7_63	TMEM39A	-0.845896	0.0096536
ENST00000247178.6-1-9_82	ATG14	0.395726	0.00982167
ENST00000320578.3-1-1_165	RAB39A	-0.842467	0.00989088
ENST00000066544.8-7-18_49	CDC27	1.84472	0.0111027
ENST00000066544.8-4-18_414	CDC27	1.31744	0.0116737
ENST00000083182.8-9-12_129	APPBP2	2.17668	0.0133158
ENST00000256497.9-9-11_14	EDEM1	-0.442642	0.0123427
ENST00000261837.12-8-11_45	GNB5	-0.698457	0.0132862
ENST00000264254.11-4-5_49	PDCL3	-0.226211	0.0134897
ENST00000267460.9-1-5_4076	PELI2	-1.24673	0.0128166
ENST00000269397.9-3-4_6	CBX4	0.374665	0.0117944
ENST00000274140.10-17-25_24	MARCHF6	0.535598	0.0131852
ENST00000278903.11-2-9_36	EI24	0.651707	0.0121249
ENST00000283351.10-28-28_11	TRAPPC8	2.21436	0.0135081
ENST00000296003.9-12-18_10	MTMR14	-1.67136	0.0131023
ENST00000321297.10-14-17_26	ATG16L2	1.89849	0.0129866
ENST00000331272.9-6-8_144	FBXW4	-2.14376	0.0117157
ENST00000334696.11-7-12_11	ENTPD5	-2.24664	0.0102762
ENST00000347519.12-3-5_18	CHMP4A	0.382218	0.0125154
ENST00000351050.8-2-7_29	GNAT2	0.822715	0.0121012
ENST00000356763.8-12-18_274	PIK3R4	0.537654	0.0128882
ENST00000356840.8-5-6_30	MYLIP	0.425304	0.0116775
ENST00000367435.5-1-16_189	CDC73	-0.280052	0.0107979
ENST00000367679.7-5-5_23	CACYBP	-0.523776	0.0117745
ENST00000370558.8-7-8_394	SH3GLB1	0.280747	0.0127834
ENST00000378372.8-7-13_23	HSPA14	-2.21137	0.0113737
ENST00000380075.7-2-7_30	TRIM54	-1.17977	0.0126466
ENST00000381070.8-13-13_945	CWC27	0.416272	0.0131016
ENST00000383673.5-2-5_468	DRD3	1.56384	0.0108075
ENST00000389629.8-7-17_36	RTF1	-2.10788	0.0132544
ENST00000397066.9-9-16_45	CCNF	2.17435	0.0109992
ENST00000439351.5-1-9_131	DNAJB11	0.316627	0.0116829
ENST00000446818.6-14-20_757	TBC1D5	1.60072	0.011692
ENST00000495893.7-12-14_151	PHC3	2.04179	0.0116155
ENST00000532097.6-3-12_2	PSMD13	-1.12985	0.0122677
ENST00000622495.5-3-11_34	FBXO21	-0.245366	0.013385
ENST00000648336.2-2-10_207	UBE3A	-0.389392	0.0101115
ENST00000675843.1-21-61_9	ATM	0.612517	0.0135632
ENST00000262039.9-13-24_300	PIK3C3	-0.764936	0.0140456
ENST00000264350.8-9-22_52	HERC5	-1.94387	0.0142007
ENST00000520539.6-34-58_179	UBR5	-2.11859	0.0141794
ENST00000545606.6-6-14_36	CAND1	0.427193	0.0142627
ENST00000622138.4-4-5_4	TRIM49B	-1.91744	0.0141665
ENST00000648817.1-2-11_92	DNAJC21	0.719296	0.0138303
ENST00000320585.11-4-10_27	CHORDC1	-0.217939	0.0144649
ENST00000361756.8-7-8_60	RNF121	1.31217	0.0144857
ENST00000420843.7-12-15_178	ARRB1	0.604496	0.0145771
ENST00000066544.8-9-18_86	CDC27	0.932993	0.0175537
ENST00000217958.8-4-4_46	PSMD10	-0.296126	0.0176547
ENST00000221566.7-5-9_40	SGTA	0.793749	0.0187483
ENST00000226725.11-1-14_98	KLHL2	0.581848	0.01564
ENST00000226725.11-2-14_65	KLHL2	-0.676017	0.0175756
ENST00000238497.10-6-10_2	VPS4B	-0.8692	0.0215172
ENST00000246957.10-6-17_163	TRAP1	0.546297	0.018086
ENST00000247668.7-1-9_43	TRAF2	0.864224	0.0198586
ENST00000252015.3-11-18_308	TRPC4AP	-0.49485	0.0214357
ENST00000256190.12-19-39_8	SBF2	-1.70492	0.0214933
ENST00000259605.11-10-11_58	RNF38	-0.43593	0.0214474
ENST00000262370.12-3-16_74	MGRN1	0.2037	0.0197982
ENST00000262455.7-3-11_283	ERP44	0.389636	0.0147119
ENST00000262493.12-4-7_104	GNAO1	-0.767014	0.0195881
ENST00000262903.9-7-23_389	HACE1	0.341607	0.0179084
ENST00000263634.8-7-8_384	ASB3	0.631398	0.0193638
ENST00000264346.12-20-22_36	HERC6	1.94053	0.0189191
ENST00000264926.7-11-12_181	RAD18	-1.93169	0.0214299
ENST00000267938.9-7-12_22	UBE2Q2	2.13803	0.0176547
ENST00000270586.8-2-5_16	PSMB6	0.82466	0.0184631
ENST00000280700.10-5-11_40	NGLY1	1.10836	0.0209246
ENST00000283290.10-11-11_50	ATG3	-0.655732	0.0166093
ENST00000283351.10-20-28_65	TRAPPC8	0.459594	0.0206846
ENST00000290650.9-31-46_36	UBR1	-0.338253	0.0154861
ENST00000292853.9-3-4_32	FBXO27	1.27984	0.0154421
ENST00000296679.9-2-12_438	WDR41	1.85082	0.0173143
ENST00000298910.12-10-50_22	LRRK2	0.600972	0.0184509
ENST00000308275.8-6-6_174	FBXO22	0.520034	0.0151736
ENST00000309428.10-3-8_38	RETREG3	-0.909874	0.0215756
ENST00000310053.10-10-24_54	HLTF	0.832422	0.0184286
ENST00000313050.11-2-29_12	SEC16A	-1.86282	0.0173213
ENST00000313221.8-8-17_37	FBXL13	1.00925	0.0190625
ENST00000313601.11-5-7_58	GNAI2	0.613116	0.0216754
ENST00000317868.9-4-9_3	ATG4C	1.09113	0.0162363
ENST00000318006.10-20-24_7	VPS39	2.1209	0.0188611
ENST00000319172.10-1-7_35	TMEM39A	-0.397919	0.0209504
ENST00000319172.10-4-7_239	TMEM39A	0.603162	0.0212518
ENST00000319394.8-11-14_122	WDTC1	-1.88721	0.0216985
ENST00000326873.12-3-8_8	STK11	1.60848	0.0195942
ENST00000331890.6-2-8_2	FBXL6	1.48144	0.0176536
ENST00000347063.9-5-8_194	RNF175	0.810573	0.0189928
ENST00000355528.9-9-38_227	TBCD	0.576093	0.0199084
ENST00000356136.8-14-14_1155	UVRAG	-0.546692	0.0159337
ENST00000356232.10-4-11_37	UBA5	-0.496453	0.0198587
ENST00000356638.8-8-23_5	GANAB	1.62424	0.0148142
ENST00000358901.11-1-16_272	VCP	-0.188616	0.0176317
ENST00000361368.7-9-17_96	SMURF1	1.03884	0.0168162
ENST00000361371.10-18-29_51	LTN1	-0.407471	0.0212854
ENST00000368309.4-2-10_33	UBQLN4	-0.373047	0.0150528
ENST00000376980.8-3-11_242	DNAJC1	1.41145	0.0200505
ENST00000378747.8-5-12_116	OPTN	0.752969	0.0201835
ENST00000379540.8-20-23_39	NFX1	-0.845929	0.0193837
ENST00000393094.7-11-18_330	CUL5	-0.43814	0.0168137
ENST00000394520.7-6-6_40	RNF14	0.363148	0.0211514
ENST00000394570.7-13-18_60	UNC45B	1.71958	0.0202954
ENST00000395544.9-15-26_135	ULK2	0.542845	0.0157909
ENST00000396394.7-4-9_49	PSMA1	-0.929487	0.0189304
ENST00000422003.6-5-6_71	TBCEL	-1.09826	0.0149948
ENST00000449290.6-4-5_2	TRIM51	1.32915	0.0164988
ENST00000533727.5-15-16_28	AMBRA1	0.337479	0.0211122
ENST00000554659.6-5-5_34	VTI1B	-0.591424	0.0155814
ENST00000571995.6-2-5_118	RAB40B	-0.571208	0.0191433
ENST00000582693.5-4-8_315	RNF115	1.01362	0.0194946
ENST00000591916.7-1-6_30	PTGES3L	0.481306	0.017612
ENST00000602117.1-1-3_199	MARCHF2	1.4417	0.0194646
ENST00000608443.6-3-7_65	FKBP8	-0.350712	0.0186335
ENST00000649217.2-12-16_17	MALT1	1.88609	0.0213904
ENST00000649796.2-5-7_350	GNAI1	0.2449	0.0200436
ENST00000674063.1-17-21_476	PIK3CB	-0.361961	0.017234
ENST00000003084.11-7-26_148	CFTR	0.818495	0.0264143
ENST00000216034.6-2-3_36	TOMM22	1.1466	0.0260745
ENST00000216455.9-2-10_92	PSMA3	0.232981	0.0254704
ENST00000216879.8-7-8_365	NSFL1C	0.231446	0.0225197
ENST00000221943.14-5-5_10	DMAC2	-0.376195	0.0261684
ENST00000223321.9-6-7_53	PSMA2	0.857965	0.0240944
ENST00000230895.11-2-3_211	DAP	-0.455309	0.0265343
ENST00000232978.13-5-15_372	NKTR	-1.22284	0.0269838
ENST00000252050.9-33-39_54	CUL9	2.02506	0.0271461
ENST00000255977.7-6-7_7	MKRN1	1.19	0.0252288
ENST00000262291.9-9-10_357	VMP1	-1.84944	0.0239536
ENST00000262291.9-2-10_49	VMP1	1.37745	0.0249325
ENST00000262493.12-4-7_712	GNAO1	-1.45205	0.0237093
ENST00000264954.5-1-3_181	GRPEL1	-1.65989	0.0231749
ENST00000276893.10-10-15_100	UHRF2	-0.488251	0.0260704
ENST00000287598.11-8-22_155	BUB1B	0.261528	0.0229084
ENST00000292363.10-2-8_27	RNF126	0.452088	0.0249667
ENST00000295704.7-4-9_7	RNF25	-0.425654	0.022556
ENST00000298910.12-28-50_72	LRRK2	-1.93929	0.0231416
ENST00000310053.10-1-24_117	HLTF	-0.201009	0.0219299
ENST00000310301.9-18-28_36	VPS41	1.93169	0.0272756
ENST00000310528.9-4-12_1	SUGT1	-0.291973	0.0235223
ENST00000311269.10-5-9_253	MARCHF10	-1.5766	0.0254375
ENST00000311481.11-1-5_9	RAB1B	-0.501543	0.0228437
ENST00000317506.8-6-13_274	RANBP10	0.661849	0.0238096
ENST00000319394.8-5-14_193	WDTC1	-0.865542	0.0253273
ENST00000334136.11-7-27_36	HDAC6	-0.2949	0.0253372
ENST00000339852.5-3-5_22	NCCRP1	-1.96394	0.0252947
ENST00000341084.7-8-8_18	RNF19A	-0.839567	0.0271677
ENST00000357654.9-2-21_208	BRCA1	0.369656	0.0259835
ENST00000358303.9-1-9_100	ZC3HC1	-0.30393	0.0242076
ENST00000367669.8-1-19_819	COP1	0.664226	0.0224173
ENST00000375254.8-96-105_26	UBR4	1.68739	0.0259203
ENST00000376052.5-5-29_104	TPP2	-2.15404	0.0242068
ENST00000377534.8-28-30_124	LMO7	-0.427266	0.0254619
ENST00000379263.8-7-16_2	DNAJC2	0.560744	0.0241366
ENST00000379540.8-19-23_79	NFX1	-1.6401	0.0264028
ENST00000381070.8-8-13_17	CWC27	0.257512	0.0266942
ENST00000392017.9-8-17_39	ATG16L1	-0.443669	0.0271983
ENST00000392017.9-8-17_42	ATG16L1	0.462732	0.0257726
ENST00000396703.6-2-4_3371	UBE2E2	-1.54559	0.022358
ENST00000397128.6-5-8_10	PRKAA1	0.206972	0.0222118
ENST00000399464.7-14-28_2	NEURL4	-0.329357	0.0267811
ENST00000399793.6-1-6_1244	RETREG1	-1.45742	0.0246751
ENST00000401950.7-6-17_197	MTMR3	0.686648	0.0236319
ENST00000446818.6-8-20_55	TBC1D5	-0.619208	0.0249826
ENST00000504102.6-8-8_13	SPOP	-1.07689	0.025107
ENST00000517970.6-5-22_41	WWP1	1.40625	0.0229828
ENST00000528494.5-8-16_64	ATG13	-0.283931	0.0253564
ENST00000528494.5-7-16_11	ATG13	0.542236	0.0271165
ENST00000533632.6-2-4_24	TRAPPC4	0.446003	0.0263947
ENST00000582970.5-5-66_20	RNF213	-0.571427	0.0261656
ENST00000648336.2-2-10_1049	UBE3A	1.74607	0.0247325
ENST00000675903.1-28-40_40	TRIP12	0.297132	0.0230751
ENST00000441788.7-5-12_113	FZR1	-0.894643	0.0274335
ENST00000309033.5-4-5_33	UBXN2A	-0.702104	0.0277949
ENST00000321297.10-15-17_28	ATG16L2	-0.196248	0.0284728
ENST00000350612.11-15-24_12	SUPT20H	1.86788	0.0277228
ENST00000351808.10-17-24_66	IFT88	0.961549	0.0283135
ENST00000355528.9-30-38_1	TBCD	0.926055	0.0285008
ENST00000367602.8-7-11_236	QSOX1	0.676605	0.0280365
ENST00000370558.8-7-8_96	SH3GLB1	-1.0192	0.0282527
ENST00000374272.4-2-8_224	TRIM63	-0.35956	0.0283182
ENST00000395665.9-11-13_15	FBXW10	1.01546	0.0278306
ENST00000528080.6-2-6_60	TMEM41B	-0.405104	0.0279886
ENST00000215730.12-2-4_223	SNAP29	0.285673	0.035201
ENST00000229268.13-13-19_34	USP5	-0.149942	0.0339135
ENST00000232978.13-6-15_22	NKTR	-0.509425	0.0303398
ENST00000232978.13-8-15_2	NKTR	-0.696344	0.0342562
ENST00000235329.10-16-16_209	MFN2	-1.50627	0.0348203
ENST00000252015.3-12-18_114	TRPC4AP	1.87807	0.0333864
ENST00000252015.3-12-18_72	TRPC4AP	1.22909	0.0334201
ENST00000254950.13-8-10_35	VPS4A	0.138503	0.0341991
ENST00000256497.9-6-11_25	EDEM1	-0.643365	0.0300461
ENST00000257548.10-1-12_112	USP30	-0.223807	0.0323096
ENST00000261819.8-14-16_4	ANAPC5	-0.274678	0.0330833
ENST00000262033.11-1-7_457	PTGES3	-0.69178	0.0316641
ENST00000262903.9-7-23_281	HACE1	0.512904	0.036208
ENST00000263228.4-4-4_217	UBE2R2	-0.230993	0.034312
ENST00000263925.8-8-9_175	LNX1	-0.703799	0.0358456
ENST00000264350.8-20-22_89	HERC5	-0.885649	0.0287994
ENST00000264658.11-2-14_806	FBXL20	0.498517	0.0334805
ENST00000267938.9-7-12_8	UBE2Q2	0.319611	0.0309201
ENST00000272091.8-5-6_18	SDE2	-0.223544	0.0315212
ENST00000272227.8-10-12_35	PDIA6	0.333379	0.0346422
ENST00000273130.9-7-12_20	DYNC1LI1	-1.37866	0.0334778
ENST00000275603.9-5-13_21	CCT6A	0.199633	0.0297995
ENST00000298068.10-10-20_12	HECTD2	-1.32711	0.0364491
ENST00000298910.12-34-50_8	LRRK2	0.948914	0.0363343
ENST00000300747.10-4-5_10	TRIM68	-0.831831	0.0293154
ENST00000301764.12-16-26_70	DDB1	-0.424376	0.0299396
ENST00000307741.11-8-12_20	THOP1	-0.1969	0.0332848
ENST00000308284.10-13-24_246	SEC16B	1.38904	0.0307636
ENST00000311635.12-8-8_238	FBXO31	-0.397105	0.0292577
ENST00000313601.11-5-7_65	GNAI2	0.24657	0.0364644
ENST00000316059.7-6-10_21	ZFP91	-0.501924	0.0301448
ENST00000317089.10-3-8_55	DNAJA2	0.435882	0.0343702
ENST00000319394.8-6-14_76	WDTC1	-0.500977	0.0293931
ENST00000319394.8-10-14_11	WDTC1	0.860309	0.0328576
ENST00000319715.10-14-17_9	RBBP6	1.29021	0.0331486
ENST00000320740.12-2-6_173	PELI3	1.58334	0.0366856
ENST00000322122.8-4-5_43	TRIM72	-1.92669	0.0302785
ENST00000325222.9-18-20_17	CUL1	0.653093	0.0359281
ENST00000326735.13-7-28_20	ATP13A2	-1.07987	0.0367943
ENST00000331456.7-11-14_142	TRAIP	-0.805273	0.0332448
ENST00000342494.8-22-25_267	UBE3B	0.70593	0.0307065
ENST00000343090.11-9-27_27	UBE4B	-0.176734	0.0333237
ENST00000351808.10-12-24_388	IFT88	-0.872189	0.0317981
ENST00000351808.10-10-24_33	IFT88	0.570262	0.0358696
ENST00000354911.9-1-13_60	WAC	0.834472	0.0365419
ENST00000356638.8-4-23_82	GANAB	-0.448159	0.0351849
ENST00000357246.4-3-3_8	MAP1LC3C	1.61646	0.0310325
ENST00000359154.7-18-22_64	WWP2	-1.79432	0.0345247
ENST00000360280.8-69-71_90	VPS13A	-1.67412	0.0345243
ENST00000361367.7-22-24_40	CTR9	0.238531	0.0314359
ENST00000367435.5-13-16_193	CDC73	1.33359	0.0353203
ENST00000367669.8-12-19_117	COP1	1.6827	0.036223
ENST00000367696.7-15-18_3	RC3H1	-1.58992	0.0308518
ENST00000368074.6-5-11_165	DCAF8	-0.408754	0.0362032
ENST00000377560.9-58-75_26	HECTD4	0.656401	0.0354151
ENST00000379540.8-17-23_58	NFX1	1.51911	0.02976
ENST00000381375.7-8-11_40	CDC20B	-1.21713	0.0293049
ENST00000393094.7-17-18_15	CUL5	1.84338	0.034339
ENST00000394420.9-11-13_6	RSPRY1	1.74869	0.0363034
ENST00000395544.9-23-26_14	ULK2	1.99731	0.035163
ENST00000395891.7-18-27_17	HECW1	1.24126	0.0340348
ENST00000397119.8-13-16_28	DYNC1I2	-0.538408	0.0366988
ENST00000397292.8-6-13_144	PLAA	-0.24744	0.0357412
ENST00000399017.6-24-44_19	TTC3	-0.620464	0.0322407
ENST00000400237.2-1-3_159	RFPL2	0.465355	0.0319039
ENST00000402738.6-6-23_36	HERC3	-0.773165	0.0339439
ENST00000403359.8-12-22_19	FBXO11	-1.33854	0.0293058
ENST00000409785.9-6-6_66	KCMF1	0.346756	0.0307939
ENST00000409790.6-7-23_237	CLEC16A	-0.901206	0.0351535
ENST00000420843.7-1-15_310	ARRB1	-1.90672	0.0340781
ENST00000439977.7-5-7_19	HERPUD1	0.263891	0.0338511
ENST00000446818.6-8-20_45	TBC1D5	0.607	0.031762
ENST00000468148.6-3-5_14	RAB23	-0.852599	0.0348532
ENST00000499023.7-12-14_10	PLRG1	-1.81035	0.0291479
ENST00000502492.6-5-7_107	SNF8	-0.584461	0.0309965
ENST00000539276.7-18-19_12	ATP2A2	-0.325093	0.0304606
ENST00000590099.6-8-10_26	BECN1	1.81101	0.0341875
ENST00000646701.1-15-20_22	DEPDC5	0.184634	0.0342274
ENST00000650932.1-10-15_14	UHRF1	0.410027	0.0355301
NTC_77180	NTC	0.795405	0.0299483
ENST00000313601.11-5-7_26	GNAI2	-0.266072	0.0371378
ENST00000377560.9-25-75_56	HECTD4	-0.243571	0.0371316
ENST00000382368.8-3-4_1075	FBXL18	0.299473	0.0370539
ENST00000025008.10-1-21_27	RB1CC1	1.46939	0.0389604
ENST00000228495.11-5-6_61	KCTD10	-0.308605	0.0381972
ENST00000229268.13-19-19_2	USP5	1.1592	0.0386003
ENST00000264350.8-9-22_29	HERC5	1.79803	0.0387763
ENST00000278903.11-9-9_7	EI24	1.76009	0.0388656
ENST00000292782.9-3-6_10	DCUN1D1	-0.686456	0.0381582
ENST00000296343.10-12-19_39	RUBCN	-0.834064	0.0377104
ENST00000300417.10-15-23_28	LRSAM1	0.538123	0.0377909
ENST00000314191.7-82-85_6	PRKDC	-0.33042	0.0389967
ENST00000315368.8-26-27_51	ANAPC4	0.330212	0.0392018
ENST00000358912.5-1-5_60	PELI1	0.264845	0.0377072
ENST00000361582.8-6-30_192	DZIP3	-1.17713	0.0384239
ENST00000369278.5-1-18_67	UFL1	-1.76308	0.0381108
ENST00000379887.9-7-13_104	ARIH1	-0.256972	0.0388385
ENST00000420843.7-10-15_60	ARRB1	1.92617	0.0377598
ENST00000422003.6-6-6_1115	TBCEL	-0.255392	0.0391995
ENST00000456430.6-1-14_323	CAND2	-0.137699	0.0382081
ENST00000502399.7-15-17_71	MARK2	-1.8983	0.0389245
ENST00000677123.1-7-15_32	PRKCSH	1.70035	0.0376952
ENST00000368003.6-2-5_9	UFC1	-0.791289	0.0393986
ENST00000378045.5-2-4_183	FUNDC1	0.198645	0.0394252
ENST00000356221.8-13-17_14	CDC16	-0.324635	0.0396177
ENST00000206595.11-12-13_51	G2E3	-1.3636	0.0457327
ENST00000216455.9-5-10_41	PSMA3	1.80901	0.0455642
ENST00000221543.10-9-16_16	TBC1D17	0.463618	0.0414677
ENST00000225726.10-8-11_65	CCDC47	-0.260167	0.0436404
ENST00000246957.10-6-17_200	TRAP1	-0.548302	0.0410647
ENST00000259253.11-5-40_65	UGGT1	0.884859	0.0408858
ENST00000262294.12-10-23_65	TRIM37	1.28376	0.0423182
ENST00000262435.14-6-18_24	SMURF2	-1.67116	0.0457535
ENST00000263904.5-2-13_49	STAM2	1.13848	0.0464166
ENST00000264607.9-3-4_426	ASB1	-1.37876	0.0449495
ENST00000265686.8-4-18_30	TCIRG1	0.846341	0.0406286
ENST00000269397.9-2-4_26	CBX4	-0.182993	0.0467916
ENST00000269397.9-2-4_61	CBX4	0.603202	0.0443247
ENST00000271308.9-1-8_190	PSMA5	1.80025	0.0451002
ENST00000283351.10-28-28_5	TRAPPC8	1.22547	0.0436312
ENST00000283632.5-4-8_531	RMND5A	0.609769	0.0440304
ENST00000287777.5-5-5_113	KLHL40	0.366368	0.0470399
ENST00000295213.9-4-12_267	SPATA18	-0.956824	0.0410851
ENST00000295688.8-6-13_18	CCT3	-0.380341	0.0447346
ENST00000295704.7-2-9_14	RNF25	0.756319	0.0423286
ENST00000296679.9-2-12_89	WDR41	-0.350151	0.0423278
ENST00000296933.10-10-11_13	FBXW11	-0.538382	0.0415201
ENST00000296933.10-10-11_70	FBXW11	0.279776	0.0448521
ENST00000307142.9-2-4_111	SYNPO2	-0.41027	0.0447168
ENST00000308284.10-7-24_84	SEC16B	0.444071	0.0407397
ENST00000309755.9-1-14_458	KLHL3	1.77019	0.0429259
ENST00000311635.12-6-8_24	FBXO31	-0.641709	0.0451936
ENST00000314191.7-80-85_82	PRKDC	-0.37908	0.0452829
ENST00000314673.8-15-28_78	SNX14	-1.27924	0.0415407
ENST00000331272.9-7-8_34	FBXW4	-1.27926	0.0470662
ENST00000337138.9-1-14_1171	HIF1A	0.846643	0.0442329
ENST00000340253.10-18-20_21	FBXO38	0.930406	0.0436923
ENST00000340253.10-18-20_28	FBXO38	-0.456804	0.0429436
ENST00000340253.10-1-20_58	FBXO38	-0.370351	0.0417271
ENST00000342494.8-22-25_213	UBE3B	-0.953249	0.0424428
ENST00000342494.8-7-25_186	UBE3B	-1.66191	0.0399617
ENST00000343090.11-20-27_8	UBE4B	0.37417	0.043845
ENST00000345093.9-2-4_33	RNF41	0.822821	0.0469613
ENST00000355621.8-1-6_3302	UBE2H	1.57888	0.0412204
ENST00000358465.7-4-19_487	TRIM33	-0.674468	0.0416372
ENST00000358701.10-6-11_159	QSOX2	1.8175	0.0446351
ENST00000358701.10-6-11_131	QSOX2	-0.50052	0.0470253
ENST00000359154.7-12-22_9	WWP2	0.124219	0.0404566
ENST00000360943.10-3-6_104	UBE2Z	0.553964	0.0467264
ENST00000361368.7-11-17_34	SMURF1	-0.539193	0.0448414
ENST00000368010.4-2-3_6	PFDN2	0.655412	0.0425122
ENST00000370693.5-1-2_489	BAG2	1.84989	0.0455822
ENST00000371322.11-3-19_26	CUL4B	-0.248556	0.0442072
ENST00000374864.10-22-22_31	ITCH	-0.279372	0.0437139
ENST00000375254.8-73-105_147	UBR4	0.662759	0.0466216
ENST00000377071.9-6-22_733	KDM2B	-0.76031	0.0430388
ENST00000377658.8-2-3_233	KLHL21	0.204025	0.0430128
ENST00000377724.8-2-6_225	DCAF10	0.642873	0.0436256
ENST00000379263.8-5-16_60	DNAJC2	-1.30379	0.0467378
ENST00000392894.8-5-8_226	RNF13	0.19094	0.0470195
ENST00000393674.7-1-4_27	FBXO8	-1.3495	0.0429601
ENST00000394222.8-3-9_1207	ARL13B	0.942218	0.0404974
ENST00000409757.9-3-12_35	TBC1D14	-0.527916	0.0453306
ENST00000421745.6-17-73_4	BIRC6	-1.41663	0.0431557
ENST00000421745.6-53-73_78	BIRC6	1.64947	0.042563
ENST00000446197.8-1-13_91	DCAF11	0.194216	0.0468588
ENST00000455511.7-1-10_241	ANAPC7	0.448429	0.0424543
ENST00000502399.7-16-17_25	MARK2	0.281013	0.0466825
ENST00000507656.6-2-3_147	ANAPC10	-0.427119	0.0447078
ENST00000528494.5-4-16_54	ATG13	-1.68216	0.043056
ENST00000539479.6-3-9_28	MDM2	-0.488842	0.0467625
ENST00000622138.4-4-5_1	TRIM49B	1.06344	0.04577
ENST00000644978.2-17-27_173	HECW2	1.32043	0.0465881
ENST00000648336.2-1-10_96	UBE3A	0.165997	0.0440255
ENST00000675843.1-10-61_9	ATM	-0.777026	0.042775
ENST00000650932.1-10-15_59	UHRF1	-0.344712	0.0472427
ENST00000675843.1-59-61_29	ATM	-0.331142	0.0472858
ENST00000209884.5-1-10_256	KLHL20	0.591991	0.0478276
ENST00000311635.12-8-8_153	FBXO31	-0.435105	0.0474636
ENST00000325617.10-4-13_51	CLGN	-1.04834	0.04778
ENST00000420843.7-11-15_115	ARRB1	0.989203	0.047796
NTC_77299	NTC	0.36564	0.0475948
ENST00000370794.7-19-22_29	USP33	-0.347835	0.0483066
ENST00000394222.8-3-9_239	ARL13B	-0.922576	0.0483935
ENST00000579016.6-8-13_20	ENGASE	-0.739998	0.0484099
ENST00000262394.7-6-8_17	WSB1	-0.233569	0.0490046
ENST00000272793.11-31-38_382	UBR3	-1.44008	0.0488548
ENST00000323557.12-5-12_2	FBXO9	-0.266678	0.049012
ENST00000327697.11-14-37_30	RNF123	0.874232	0.0490634
ENST00000429979.6-5-12_14	RUBCNL	0.790296	0.0491378
ENST00000469044.6-3-21_32	ARMC8	0.742628	0.0486255
ENST00000263634.8-7-8_357	ASB3	0.573892	0.0494437
ENST00000361368.7-13-17_75	SMURF1	1.61517	0.0493934
ENST00000403359.8-4-22_5	FBXO11	-0.620197	0.0495365
ENST00000268148.13-2-3_16	DET1	0.406968	0.0501613
ENST00000324972.10-7-15_58	DYNC1I1	0.189079	0.0502524
ENST00000361368.7-17-17_185	SMURF1	1.39218	0.0502409
ENST00000083182.8-4-12_445	APPBP2	-1.19245	0.0518807
ENST00000209884.5-1-10_57	KLHL20	0.166889	0.050582
ENST00000216879.8-8-8_133	NSFL1C	-1.67754	0.0517574
ENST00000231948.8-4-10_10	CRBN	0.339028	0.0505171
ENST00000262903.9-2-23_60	HACE1	-1.6835	0.0516419
ENST00000265651.8-1-10_217	FBXO3	-0.419681	0.0506574
ENST00000299300.11-15-15_50	CCT2	-0.50287	0.0512781
ENST00000331456.7-1-14_271	TRAIP	0.710972	0.0508015
ENST00000331456.7-6-14_18	TRAIP	0.987063	0.0518013
ENST00000361368.7-3-17_11	SMURF1	-0.670131	0.0510822
ENST00000371244.9-2-8_99	PRKAA2	0.752826	0.0515577
ENST00000379887.9-10-13_52	ARIH1	-0.224271	0.0513782
ENST00000419743.7-4-9_27	FBXO15	0.967077	0.051741
ENST00000622495.5-7-11_23	FBXO21	-0.624958	0.0511012
ENST00000677123.1-4-15_60	PRKCSH	0.192649	0.0508939
ENST00000333486.4-4-23_10	UBA7	-0.545913	0.052565
ENST00000262394.7-8-8_15	WSB1	0.146261	0.0527771
ENST00000469044.6-2-21_307	ARMC8	-0.967948	0.0528436
ENST00000388968.8-6-10_26	HSPD1	0.498328	0.0530132
ENST00000280098.9-2-9_5	SPOPL	0.285762	0.0533221
ENST00000301281.11-5-10_88	UBXN6	0.767206	0.053569
ENST00000307741.11-8-12_72	THOP1	-0.202079	0.0534668
ENST00000409682.8-4-9_51	PSMD14	-0.420673	0.0532395
ENST00000435532.7-2-28_86	NEDD4	-0.976384	0.0533808
ENST00000247178.6-2-9_89	ATG14	-0.578828	0.05406
ENST00000269221.8-7-19_72	RMC1	-0.742131	0.0538684
ENST00000356232.10-8-11_64	UBA5	-1.22487	0.0540455
ENST00000260247.10-1-7_133	DCUN1D5	-0.139082	0.0558174
ENST00000262406.10-11-18_155	RGS9	-1.10292	0.0560538
ENST00000272793.11-38-38_7	UBR3	-0.451002	0.0553867
ENST00000275233.12-17-28_31	SHPRH	1.48182	0.0560868
ENST00000295888.9-64-64_143	WDFY3	-0.724581	0.0555353
ENST00000296933.10-10-11_49	FBXW11	0.211029	0.0556225
ENST00000306368.9-1-4_99	RNF181	-0.551242	0.0546139
ENST00000306627.8-2-4_2264	UBE2E1	0.90998	0.0560629
ENST00000310430.11-6-26_60	TNKS	-1.37618	0.0559078
ENST00000313221.8-8-17_435	FBXL13	-0.555931	0.0565315
ENST00000314191.7-33-85_24	PRKDC	0.225369	0.0548429
ENST00000321556.5-3-7_369	PINK1	-0.432477	0.0552906
ENST00000352689.11-15-17_30	MKLN1	0.149456	0.0565044
ENST00000361189.7-4-8_102	PJA2	-0.21216	0.0554311
ENST00000369939.8-17-21_10	ELAPOR1	-0.463057	0.0564358
ENST00000380034.8-4-6_58	TRIM5	-1.24082	0.0544953
ENST00000456430.6-4-14_118	CAND2	-0.61349	0.056059
ENST00000528080.6-3-6_8	TMEM41B	-0.540229	0.0557153
ENST00000544440.7-28-82_29	MYCBP2	-0.793359	0.0547773
ENST00000545606.6-2-14_57	CAND1	-0.314223	0.0562517
ENST00000582693.5-2-8_87	RNF115	-0.185786	0.0547671
ENST00000675843.1-42-61_85	ATM	1.66542	0.0565888
ENST00000377560.9-73-75_44	HECTD4	0.732798	0.0567568
ENST00000209884.5-10-10_151	KLHL20	1.51141	0.0579275
ENST00000223321.9-4-7_14	PSMA2	-0.218373	0.0598993
ENST00000237455.5-3-3_81	RNF103	-1.50041	0.0600486
ENST00000247178.6-1-9_579	ATG14	0.20654	0.0575488
ENST00000254436.8-4-5_11	TRIM21	-0.464696	0.0619478
ENST00000254950.13-8-10_41	VPS4A	-0.351115	0.0608942
ENST00000256190.12-37-39_35	SBF2	1.60052	0.0610758
ENST00000262039.9-1-24_32	PIK3C3	-0.164565	0.0589123
ENST00000262493.12-5-7_96	GNAO1	0.280127	0.0586439
ENST00000264414.9-11-15_135	CUL3	0.228118	0.0595029
ENST00000269260.7-12-14_6	ARRB2	-0.77866	0.0595072
ENST00000272227.8-10-12_54	PDIA6	-0.613349	0.0586676
ENST00000272227.8-11-12_122	PDIA6	-0.762314	0.059221
ENST00000282041.11-10-43_163	EPG5	-1.77516	0.0613013
ENST00000283290.10-11-11_22	ATG3	-0.454863	0.0614342
ENST00000284637.14-6-10_23	SH3RF1	-1.55537	0.0586145
ENST00000295131.3-2-8_45	ZSWIM2	-1.1629	0.0592959
ENST00000296933.10-4-11_5	FBXW11	-0.26449	0.0569371
ENST00000298068.10-19-20_19	HECTD2	0.363681	0.059605
ENST00000300417.10-15-23_153	LRSAM1	0.240672	0.0610051
ENST00000308284.10-7-24_10	SEC16B	1.05062	0.0621077
ENST00000308284.10-13-24_157	SEC16B	-0.232968	0.0615876
ENST00000317991.9-17-19_45	GRAMD1A	-1.01132	0.0573595
ENST00000319394.8-3-14_40	WDTC1	-0.285131	0.0614797
ENST00000321297.10-6-17_44	ATG16L2	-1.02705	0.0581226
ENST00000326181.11-13-19_7	TRAF7	0.250687	0.057262
ENST00000326873.12-2-8_91	STK11	0.217431	0.0617239
ENST00000334136.11-9-27_383	HDAC6	1.03363	0.0618758
ENST00000334635.10-4-10_157	DCUN1D4	-0.194785	0.0622099
ENST00000336126.6-2-8_528	PCGF5	-1.53678	0.0597299
ENST00000345851.8-3-10_21	TRIM3	0.318966	0.0619709
ENST00000361367.7-24-24_114	CTR9	-0.269223	0.0587502
ENST00000369278.5-6-18_146	UFL1	-0.221823	0.0607617
ENST00000373700.9-18-22_8	HERC4	1.69275	0.058732
ENST00000374023.8-1-4_1515	ILRUN	0.149163	0.0594132
ENST00000375254.8-71-105_25	UBR4	-0.394645	0.060434
ENST00000377534.8-2-30_417	LMO7	0.556462	0.060133
ENST00000378747.8-4-12_93	OPTN	-1.68238	0.058242
ENST00000379143.10-1-5_61	PCNA	-0.449655	0.0592494
ENST00000379540.8-18-23_5	NFX1	0.843798	0.0617304
ENST00000379624.6-6-10_6122	BABAM2	0.528289	0.0600748
ENST00000389629.8-7-17_42	RTF1	-0.432822	0.0615678
ENST00000394657.12-2-8_107	AKTIP	1.31108	0.0618433
ENST00000401950.7-6-17_183	MTMR3	1.3565	0.0584666
ENST00000404125.6-10-45_15	PSME4	-1.09578	0.0620437
ENST00000421745.6-66-73_707	BIRC6	1.20049	0.0575498
ENST00000455511.7-10-10_134	ANAPC7	-0.156694	0.0605269
ENST00000579016.6-10-13_52	ENGASE	1.44691	0.0615614
ENST00000652555.1-4-10_582	FBXW8	-0.27901	0.0580099
ENST00000675843.1-2-61_49	ATM	-1.62361	0.0593404
ENST00000287878.9-10-15_87	PRKAG2	-0.511852	0.0623186
ENST00000295688.8-6-13_98	CCT3	1.22556	0.0624502
ENST00000361582.8-1-30_136	DZIP3	0.244737	0.0629714
ENST00000254101.4-2-6_29	PRKAB2	0.523002	0.0632029
ENST00000370794.7-14-22_44	USP33	0.263771	0.0632421
ENST00000399332.6-34-41_19	HECTD1	-0.312183	0.0633988
ENST00000232978.13-14-15_23	NKTR	-0.14256	0.0639579
ENST00000261789.9-4-4_30	TM9SF1	-1.33885	0.0640351
ENST00000262854.11-68-80_6	HUWE1	1.39418	0.0644645
ENST00000315368.8-3-27_25	ANAPC4	-0.364293	0.0649338
ENST00000351808.10-13-24_59	IFT88	-1.35055	0.0646974
ENST00000354287.5-4-5_34	FBXO2	1.63052	0.0648512
ENST00000356221.8-11-17_58	CDC16	-0.307226	0.064672
ENST00000359933.6-31-41_34	ATG2B	0.994509	0.063748
ENST00000374080.8-21-44_35	MED12	0.757011	0.0648373
ENST00000377524.8-7-13_24	STAM	-0.481371	0.0649186
ENST00000443617.7-41-76_32	HERC1	0.313227	0.0638816
ENST00000533632.6-4-4_18	TRAPPC4	1.64056	0.064201
ENST00000579016.6-6-13_25	ENGASE	-1.28614	0.0645386
ENST00000341285.8-8-10_7	FBXL5	1.66597	0.0651268
ENST00000025008.10-7-21_10	RB1CC1	0.737849	0.085326
ENST00000209884.5-4-10_90	KLHL20	0.189303	0.080742
ENST00000209884.5-4-10_26	KLHL20	-0.169521	0.0785852
ENST00000215071.8-3-6_9	PSMD8	-0.997101	0.0784565
ENST00000215071.8-3-6_68	PSMD8	1.41419	0.0774758
ENST00000216225.9-4-4_26	RBX1	-0.608364	0.0805407
ENST00000223321.9-3-7_45	PSMA2	1.00223	0.0801249
ENST00000223321.9-1-7_296	PSMA2	-1.40576	0.0809838
ENST00000229268.13-13-19_57	USP5	0.205913	0.0772229
ENST00000229328.10-2-6_109	PRKAB1	0.18505	0.0811298
ENST00000231368.10-14-17_37	LNPEP	0.358069	0.0750172
ENST00000231948.8-10-10_38	CRBN	-0.394571	0.071119
ENST00000232766.6-3-9_344	KLHL18	-0.602858	0.0796583
ENST00000232978.13-6-15_3	NKTR	0.165754	0.0699677
ENST00000232978.13-12-15_66	NKTR	-1.49478	0.0838607
ENST00000239878.9-2-5_153	UFM1	-0.946722	0.0764969
ENST00000242209.9-5-9_37	FKBP9	-0.261069	0.0735249
ENST00000247178.6-7-9_40	ATG14	-0.294079	0.071457
ENST00000247668.7-1-9_18	TRAF2	0.87724	0.0825308
ENST00000251047.6-10-12_37	LMAN1	-0.402541	0.0825272
ENST00000252037.5-7-7_18	FKBP6	-0.717889	0.0663114
ENST00000256497.9-9-11_20	EDEM1	0.772258	0.0848815
ENST00000256497.9-3-11_50	EDEM1	-0.319651	0.0788616
ENST00000257575.9-5-9_597	RNFT2	0.405762	0.0801932
ENST00000258534.13-1-6_432	DRAM1	-0.421662	0.0816253
ENST00000259253.11-37-40_25	UGGT1	0.374486	0.0731241
ENST00000259512.9-6-7_100	DERL1	-0.641127	0.0723738
ENST00000261789.9-4-4_67	TM9SF1	-0.144883	0.0708414
ENST00000261813.9-2-3_184	PFDN1	-1.16421	0.0850374
ENST00000261819.8-4-16_233	ANAPC5	0.178122	0.0674695
ENST00000261837.12-5-11_336	GNB5	1.607	0.0770502
ENST00000262177.9-6-8_15	DNAJB6	0.125492	0.0700155
ENST00000262193.7-1-5_190	PSMB1	-0.220906	0.0746008
ENST00000262294.12-21-23_10	TRIM37	-1.49653	0.0825461
ENST00000262294.12-4-23_17	TRIM37	-0.330966	0.0761122
ENST00000262294.12-12-23_25	TRIM37	-1.45159	0.0778051
ENST00000262903.9-10-23_134	HACE1	0.22699	0.0811325
ENST00000263925.8-1-9_1255	LNX1	1.26345	0.0704521
ENST00000264346.12-18-22_43	HERC6	-0.393811	0.0699866
ENST00000265742.8-6-18_127	ANKIB1	0.223761	0.065999
ENST00000267938.9-9-12_21	UBE2Q2	0.303131	0.0827853
ENST00000268148.13-3-3_199	DET1	0.402365	0.0782186
ENST00000269391.11-4-18_12	RNF157	-1.35364	0.0762686
ENST00000270225.12-1-8_573	SAE1	0.451357	0.068685
ENST00000274255.11-4-9_79	SKP2	0.318219	0.0813252
ENST00000275233.12-27-28_309	SHPRH	0.359977	0.0806444
ENST00000275603.9-5-13_20	CCT6A	-0.336236	0.0749541
ENST00000276893.10-6-15_147	UHRF2	-0.832022	0.0831164
ENST00000279281.8-8-9_7	VPS51	-0.28302	0.0847145
ENST00000281623.8-2-6_128	FBXO4	1.29679	0.068848
ENST00000283351.10-8-28_10	TRAPPC8	1.31589	0.0773387
ENST00000283632.5-6-8_101	RMND5A	0.377235	0.0772527
ENST00000283632.5-6-8_25	RMND5A	0.364591	0.0686238
ENST00000284669.2-5-5_107	KLHL41	-1.27593	0.0832108
ENST00000288828.9-2-12_261	WIPI2	0.413544	0.0834054
ENST00000295901.9-6-7_168	PSMD6	0.248379	0.0818365
ENST00000296343.10-14-19_30	RUBCN	-0.898208	0.0770031
ENST00000296438.9-9-9_317	FBXW12	1.50089	0.0685619
ENST00000296464.9-10-18_107	HSPA4L	0.15375	0.0788945
ENST00000300289.10-7-12_11	PDIA3	-0.270894	0.0721949
ENST00000300417.10-12-23_35	LRSAM1	-0.237928	0.0838293
ENST00000301764.12-25-26_24	DDB1	0.141443	0.0813003
ENST00000304979.8-4-8_38	PPIH	0.926049	0.0833685
ENST00000309033.5-4-5_39	UBXN2A	0.38813	0.0778234
ENST00000313050.11-11-29_15	SEC16A	0.666773	0.0854807
ENST00000314167.9-18-27_47	GAK	0.456842	0.0781658
ENST00000315368.8-13-27_50	ANAPC4	-0.270998	0.0741538
ENST00000316059.7-4-10_9	ZFP91	-0.207452	0.0678588
ENST00000318006.10-24-24_67	VPS39	0.229867	0.0664265
ENST00000319715.10-16-17_39	RBBP6	-0.36024	0.0753038
ENST00000321394.12-5-11_30	TCP1	0.621092	0.0754543
ENST00000323557.12-5-12_93	FBXO9	0.179473	0.0680664
ENST00000324439.9-3-8_418	RCHY1	0.259151	0.06889
ENST00000324460.7-4-7_2	HSPA5	0.396248	0.0750735
ENST00000324685.11-12-18_2	RNF40	0.172193	0.0694995
ENST00000324972.10-12-15_161	DYNC1I1	-1.47956	0.0782004
ENST00000325239.11-24-60_45	WDFY4	-0.310535	0.0750894
ENST00000325617.10-8-13_1	CLGN	-0.163557	0.0826265
ENST00000327697.11-2-37_13	RNF123	-0.698348	0.0853759
ENST00000335877.11-4-6_519	PSMF1	-1.07949	0.0806639
ENST00000338591.8-7-11_6	KLHL17	-1.4698	0.0792173
ENST00000341516.10-5-8_86	DCAF5	1.26633	0.0842149
ENST00000343526.9-4-18_138	TRIM24	1.03891	0.0797304
ENST00000348370.9-8-12_14	RNF111	0.537125	0.0847744
ENST00000351808.10-10-24_39	IFT88	1.6045	0.0675141
ENST00000354449.7-9-17_71	ATG7	0.259773	0.07097
ENST00000354619.10-12-15_17	ERO1B	0.643915	0.0717416
ENST00000354852.5-5-13_14	TRIM6-TRIM34	0.297123	0.084121
ENST00000355528.9-14-38_803	TBCD	0.293591	0.085479
ENST00000356136.8-12-14_1062	UVRAG	1.16492	0.0811107
ENST00000356136.8-6-14_1869	UVRAG	0.853276	0.0713187
ENST00000356221.8-8-17_41	CDC16	0.865385	0.070597
ENST00000357654.9-7-21_42	BRCA1	0.312095	0.0814266
ENST00000358377.7-7-12_340	DCAF4	0.262624	0.0790212
ENST00000358435.9-2-2_17	TOMM7	0.944798	0.083776
ENST00000358465.7-13-19_23	TRIM33	-0.586908	0.0772604
ENST00000358514.9-4-7_24	PSMB10	-0.684611	0.0669156
ENST00000359154.7-17-22_38	WWP2	-0.166953	0.0832287
ENST00000361070.9-5-11_161	RFWD3	-0.465652	0.0842269
ENST00000361189.7-5-8_56	PJA2	0.151965	0.0743585
ENST00000361368.7-8-17_15	SMURF1	0.335304	0.0762835
ENST00000366584.9-7-8_26	LGALS8	-0.174753	0.0718524
ENST00000366698.7-4-5_7	TRIM17	-0.220395	0.0761452
ENST00000367261.8-10-10_18	KLHL12	0.245387	0.0728607
ENST00000367942.4-13-15_39	ATF6	-0.595981	0.0760909
ENST00000368352.10-7-8_50	RUSC1	-0.960551	0.0787807
ENST00000368884.8-2-9_13	PSMD4	-0.250802	0.0742165
ENST00000369244.7-3-6_58	FBXL4	-0.97358	0.0840837
ENST00000369278.5-6-18_213	UFL1	-0.188715	0.0810186
ENST00000369498.8-2-4_441	FUNDC2	1.46051	0.0786915
ENST00000370187.8-12-13_29	BTRC	-0.891822	0.0724048
ENST00000372172.5-2-20_7	HECTD3	0.654491	0.0824801
ENST00000372901.2-46-46_108	UBR2	0.467209	0.0753594
ENST00000372901.2-42-46_46	UBR2	-0.376712	0.0688462
ENST00000372901.2-45-46_24	UBR2	-0.202103	0.0786744
ENST00000374183.5-4-5_312	BSPRY	-0.296791	0.084619
ENST00000375255.8-2-13_181	DCAF17	0.418612	0.0731547
ENST00000376227.4-1-16_110	CCDC22	-0.392038	0.075273
ENST00000376753.9-3-4_98	FBXO6	-0.509973	0.0850492
ENST00000377534.8-11-30_570	LMO7	-0.58378	0.0815953
ENST00000377534.8-10-30_11	LMO7	-1.32206	0.0675249
ENST00000377560.9-47-75_29	HECTD4	-0.124288	0.0791299
ENST00000378060.9-3-13_115	VPS36	-0.733864	0.0773578
ENST00000378708.5-14-16_4	MIB2	0.491148	0.0787394
ENST00000379887.9-2-13_281	ARIH1	-0.512791	0.0745722
ENST00000382368.8-4-4_702	FBXL18	0.288059	0.0780992
ENST00000389120.8-12-18_28	RNF20	-0.204797	0.0753477
ENST00000392017.9-16-17_4	ATG16L1	-1.18652	0.0757962
ENST00000392325.9-7-9_159	WDR45B	-0.179127	0.0664364
ENST00000392745.8-1-9_36	TRAF3	-0.327892	0.0775244
ENST00000393094.7-2-18_429	CUL5	1.04492	0.0823612
ENST00000394222.8-3-9_1255	ARL13B	0.61597	0.0841397
ENST00000394520.7-6-6_44	RNF14	-0.207012	0.084141
ENST00000394657.12-7-8_63	AKTIP	1.36356	0.0703531
ENST00000395665.9-7-13_30	FBXW10	-0.298574	0.066269
ENST00000395686.8-7-15_70	ERO1A	0.136195	0.0771015
ENST00000395686.8-7-15_90	ERO1A	-0.331078	0.0852527
ENST00000395891.7-17-27_483	HECW1	-0.513548	0.0720453
ENST00000396394.7-4-9_2	PSMA1	-0.466002	0.0799124
ENST00000397128.6-2-8_92	PRKAA1	-1.41422	0.0777677
ENST00000398831.8-16-19_77	PPIL2	-0.288599	0.0845779
ENST00000398831.8-19-19_18	PPIL2	0.388708	0.0821067
ENST00000399464.7-14-28_15	NEURL4	0.148649	0.0778085
ENST00000399793.6-1-6_1759	RETREG1	-0.828954	0.0774202
ENST00000400345.8-7-30_6	NEDD4L	0.634007	0.0737597
ENST00000406438.5-1-1_177	SMCR8	-0.466682	0.074498
ENST00000409682.8-4-9_27	PSMD14	-1.45325	0.0668114
ENST00000417314.2-2-3_76	KBTBD8	0.654683	0.0843026
ENST00000417545.5-1-4_20	TRIM48	-0.504913	0.067234
ENST00000421745.6-6-73_133	BIRC6	-0.351045	0.0797032
ENST00000424310.7-2-9_556	RNF145	0.393806	0.0803735
ENST00000435532.7-7-28_45	NEDD4	0.37469	0.076899
ENST00000446818.6-2-20_226	TBC1D5	0.382271	0.0728008
ENST00000455511.7-1-10_254	ANAPC7	-0.575033	0.0749468
ENST00000457167.9-6-13_58	DNAJC7	-0.150386	0.083446
ENST00000457167.9-1-13_686	DNAJC7	-0.469559	0.0778098
ENST00000469044.6-3-21_67	ARMC8	-0.753959	0.0833517
ENST00000471841.6-9-16_43	MFN1	0.522436	0.0731435
ENST00000520530.3-3-11_18	FBXO41	0.501799	0.079152
ENST00000520539.6-12-58_29	UBR5	-0.640674	0.0704761
ENST00000528494.5-5-16_162	ATG13	0.230369	0.0733253
ENST00000535923.6-8-9_42	PHB2	1.09354	0.0732306
ENST00000544440.7-45-82_55	MYCBP2	0.468793	0.066427
ENST00000562103.2-4-13_20	ZNF598	0.282744	0.077652
ENST00000582970.5-12-66_98	RNF213	-1.30242	0.0754465
ENST00000590996.6-18-19_34	NBR1	-0.531691	0.0741599
ENST00000595090.6-12-14_14	RUVBL2	-0.483334	0.0798499
ENST00000619920.4-8-11_154	PSMC3	-0.130463	0.0697183
ENST00000622495.5-10-11_60	FBXO21	-0.223067	0.0723113
ENST00000641686.2-6-11_4	MFSD8	0.301613	0.0769282
ENST00000642610.2-7-15_43	TBCE	-0.328913	0.0722178
ENST00000642610.2-7-15_58	TBCE	-0.21949	0.0828549
ENST00000646124.2-6-20_80	LZTR1	-0.34026	0.0686205
ENST00000648817.1-8-11_9	DNAJC21	-0.295142	0.0719445
ENST00000674063.1-12-21_71	PIK3CB	-1.13125	0.0779471
ENST00000674063.1-17-21_467	PIK3CB	-1.02783	0.0774964
ENST00000675843.1-21-61_61	ATM	-0.356347	0.0820368
ENST00000675855.1-12-14_12	PEX5	-0.41867	0.0674147
ENST00000675903.1-28-40_44	TRIP12	-1.20142	0.0829016
ENST00000676185.1-3-11_18	ERCC8	-0.818309	0.0787549
ENST00000216218.8-1-11_302	ST13	-0.191398	0.0878915
ENST00000219313.9-6-6_3	PSMD7	-0.532698	0.0875618
ENST00000238497.10-6-10_6	VPS4B	1.47073	0.0878147
ENST00000257548.10-12-12_13	USP30	0.281438	0.08658
ENST00000282041.11-22-43_43	EPG5	-0.153254	0.0877566
ENST00000287598.11-2-22_114	BUB1B	-0.398934	0.0865751
ENST00000287598.11-15-22_31	BUB1B	0.214126	0.086978
ENST00000290649.10-8-13_53	AMFR	0.312825	0.0880548
ENST00000299563.5-4-5_351	RNF169	0.156025	0.0875073
ENST00000300289.10-8-12_61	PDIA3	0.18895	0.0859745
ENST00000301764.12-25-26_111	DDB1	-0.612042	0.08791
ENST00000314144.10-1-13_97	CCT6B	-0.374667	0.0877181
ENST00000314191.7-85-85_75	PRKDC	0.14063	0.0872241
ENST00000319172.10-1-7_211	TMEM39A	0.159021	0.088507
ENST00000323557.12-7-12_97	FBXO9	-0.745991	0.0862747
ENST00000331272.9-6-8_777	FBXW4	-0.264162	0.0883081
ENST00000334635.10-7-10_352	DCUN1D4	-0.732089	0.0858989
ENST00000345496.7-3-5_413	UBE2G2	-0.452668	0.0884009
ENST00000348370.9-8-12_61	RNF111	-0.137025	0.0872496
ENST00000354852.5-5-13_86	TRIM6-TRIM34	-0.476196	0.0884633
ENST00000370187.8-9-13_37	BTRC	0.266919	0.0872574
ENST00000372172.5-2-20_34	HECTD3	0.761835	0.0876639
ENST00000393359.7-5-10_104	TGFBRAP1	0.577889	0.0881927
ENST00000401950.7-14-17_16	MTMR3	0.217639	0.0870645
ENST00000403359.8-12-22_5	FBXO11	0.86214	0.0871134
ENST00000439977.7-4-7_53	HERPUD1	-0.46939	0.085896
ENST00000011619.6-10-13_67	RANBP9	-0.493411	0.0888076
ENST00000284694.11-7-8_115	C10orf90	-0.20394	0.0889822
ENST00000314673.8-5-28_8	SNX14	-0.684083	0.0890768
ENST00000360943.10-3-6_134	UBE2Z	-0.181294	0.0888666
ENST00000370794.7-7-22_22	USP33	0.630657	0.0887923
ENST00000232978.13-11-15_77	NKTR	0.771446	0.0900906
ENST00000259253.11-25-40_34	UGGT1	-1.24672	0.0911311
ENST00000261712.8-7-13_27	PSMD11	0.701081	0.0895145
ENST00000264867.7-8-12_21	PPARGC1A	0.620921	0.0904774
ENST00000283351.10-8-28_20	TRAPPC8	0.273835	0.091079
ENST00000290650.9-44-46_171	UBR1	0.581364	0.0904081
ENST00000314289.13-5-6_60	RNF4	-0.387978	0.0902277
ENST00000319380.12-9-17_81	UBE2O	0.305667	0.0896711
ENST00000347519.12-3-5_28	CHMP4A	0.354597	0.0911017
ENST00000360184.10-30-77_6	DYNC1H1	-0.12947	0.0911613
ENST00000361368.7-11-17_55	SMURF1	-0.213574	0.0910633
ENST00000373578.7-2-10_1218	SRC	-0.167117	0.0904123
ENST00000375255.8-10-13_135	DCAF17	0.387411	0.0894272
ENST00000378060.9-11-13_35	VPS36	-0.976697	0.0897856
ENST00000439351.5-3-9_89	DNAJB11	-0.174449	0.0905112
ENST00000470229.6-3-13_56	NUB1	-0.120084	0.090864
ENST00000484457.6-5-14_226	FBXL2	-1.58031	0.0904379
ENST00000499023.7-12-14_15	PLRG1	-0.200081	0.0896957
ENST00000259457.8-3-7_89	PSMB7	0.706516	0.0913348
ENST00000259457.8-3-7_13	PSMB7	0.191823	0.0913917
ENST00000262506.8-1-10_33	CSNK2A2	0.148091	0.091529
ENST00000263925.8-1-9_4248	LNX1	-0.195923	0.0916344
ENST00000397066.9-3-16_138	CCNF	-0.7134	0.0917326
ENST00000261464.10-1-9_57	TRAF5	-0.181072	0.091953
ENST00000601016.6-3-10_17	TAZ	-1.29952	0.0921862
ENST00000001008.6-5-9_37	FKBP4	-0.0486658	0.687352
ENST00000001008.6-5-9_54	FKBP4	-0.171185	0.207778
ENST00000001008.6-5-9_9	FKBP4	-0.0857642	0.31842
ENST00000003084.11-1-26_72	CFTR	-0.150043	0.597334
ENST00000003084.11-7-26_53	CFTR	0.738515	0.351629
ENST00000003084.11-13-26_12	CFTR	0.266966	0.418194
ENST00000003084.11-2-26_172	CFTR	-0.70445	0.13301
ENST00000003084.11-7-26_27	CFTR	0.285299	0.280184
ENST00000003084.11-7-26_21	CFTR	-0.243571	0.231681
ENST00000003084.11-16-26_12	CFTR	0.603253	0.355176
ENST00000003084.11-16-26_1	CFTR	0.192169	0.445324
ENST00000003084.11-1-26_907	CFTR	-0.33353	0.325889
ENST00000003084.11-1-26_1135	CFTR	-0.072681	0.614565
ENST00000003084.11-25-26_33	CFTR	-0.0774095	0.617627
ENST00000003084.11-2-26_201	CFTR	0.259068	0.314224
ENST00000003084.11-6-26_16	CFTR	0.208554	0.105056
ENST00000003084.11-25-26_14	CFTR	0.94596	0.221941
ENST00000003084.11-16-26_17	CFTR	0.160673	0.326882
ENST00000003084.11-16-26_9	CFTR	0.0632312	0.458159
ENST00000003084.11-6-26_17	CFTR	-0.477617	0.412915
ENST00000006777.11-3-3_320	RHBDD2	0.224518	0.244945
ENST00000006777.11-3-3_261	RHBDD2	0.0343108	0.583362
ENST00000009530.12-1-8_35	CD74	-0.800122	0.314359
ENST00000009530.12-1-8_329	CD74	-0.549404	0.23276
ENST00000009530.12-1-8_303	CD74	-0.215247	0.560009
ENST00000011619.6-6-13_106	RANBP9	-0.106532	0.463305
ENST00000011619.6-10-13_39	RANBP9	-0.146171	0.429233
ENST00000011619.6-6-13_57	RANBP9	0.330767	0.126409
ENST00000011619.6-10-13_137	RANBP9	0.0830202	0.56839
ENST00000011619.6-8-13_33	RANBP9	0.0986456	0.341708
ENST00000011619.6-10-13_10	RANBP9	-0.078899	0.236531
ENST00000011619.6-6-13_2	RANBP9	0.471818	0.554373
ENST00000011619.6-2-13_823	RANBP9	0.170406	0.41431
ENST00000011619.6-8-13_8	RANBP9	-0.0958719	0.366117
ENST00000011619.6-10-13_162	RANBP9	0.357085	0.107381
ENST00000011619.6-8-13_45	RANBP9	0.43375	0.319409
ENST00000011619.6-8-13_66	RANBP9	-0.694152	0.24348
ENST00000011619.6-2-13_1599	RANBP9	-1.39426	0.105578
ENST00000011619.6-8-13_19	RANBP9	-0.100213	0.666255
ENST00000011619.6-2-13_1352	RANBP9	0.166652	0.691533
ENST00000025008.10-11-21_20	RB1CC1	-0.280482	0.283208
ENST00000025008.10-19-21_23	RB1CC1	-0.377559	0.231512
ENST00000025008.10-13-21_249	RB1CC1	-0.0443725	0.630646
ENST00000025008.10-4-21_60	RB1CC1	-0.508833	0.265962
ENST00000025008.10-19-21_80	RB1CC1	-0.318724	0.492212
ENST00000025008.10-16-21_41	RB1CC1	-0.25376	0.455388
ENST00000025008.10-11-21_8	RB1CC1	-1.08086	0.151375
ENST00000025008.10-19-21_45	RB1CC1	-0.0630565	0.531281
ENST00000025008.10-16-21_283	RB1CC1	0.392469	0.277811
ENST00000025008.10-16-21_210	RB1CC1	0.032138	0.653949
ENST00000025008.10-13-21_502	RB1CC1	-0.261136	0.180898
ENST00000025008.10-4-21_28	RB1CC1	0.69936	0.342162
ENST00000025008.10-16-21_137	RB1CC1	0.48299	0.527539
ENST00000025008.10-13-21_155	RB1CC1	0.351625	0.356587
ENST00000037243.7-3-3_328	GABARAPL2	0.493919	0.467371
ENST00000037243.7-3-3_296	GABARAPL2	-0.174405	0.713639
ENST00000037243.7-3-3_438	GABARAPL2	-0.426425	0.578641
ENST00000044462.12-3-7_7	PSMA4	0.0741426	0.248831
ENST00000044462.12-3-7_37	PSMA4	0.345411	0.444475
ENST00000044462.12-3-7_77	PSMA4	0.0369197	0.680142
ENST00000044462.12-4-7_1	PSMA4	-0.100516	0.28818
ENST00000066544.8-3-18_41	CDC27	-0.891875	0.0974234
ENST00000066544.8-9-18_225	CDC27	-0.587896	0.311728
ENST00000066544.8-14-18_43	CDC27	0.257716	0.340652
ENST00000066544.8-3-18_10	CDC27	0.0359268	0.671753
ENST00000066544.8-14-18_53	CDC27	0.384268	0.437785
ENST00000066544.8-4-18_302	CDC27	0.215054	0.38771
ENST00000066544.8-9-18_299	CDC27	-0.460377	0.243632
ENST00000066544.8-7-18_7	CDC27	0.7987	0.154811
ENST00000066544.8-9-18_146	CDC27	0.367847	0.108423
ENST00000083182.8-9-12_107	APPBP2	-0.341501	0.413839
ENST00000083182.8-9-12_27	APPBP2	0.802971	0.322284
ENST00000083182.8-2-12_14	APPBP2	0.110508	0.413799
ENST00000083182.8-4-12_337	APPBP2	0.408089	0.520551
ENST00000083182.8-2-12_181	APPBP2	0.0717594	0.418475
ENST00000083182.8-9-12_85	APPBP2	1.24627	0.113055
ENST00000083182.8-2-12_65	APPBP2	0.235882	0.15335
ENST00000083182.8-2-12_82	APPBP2	0.0475116	0.647614
ENST00000158771.9-3-6_48	DERL2	0.219377	0.502073
ENST00000158771.9-6-6_119	DERL2	0.0572176	0.702659
ENST00000158771.9-3-6_99	DERL2	-0.258671	0.450522
ENST00000158771.9-3-6_56	DERL2	0.516259	0.287955
ENST00000158771.9-6-6_282	DERL2	0.14236	0.683296
ENST00000158771.9-6-6_15	DERL2	1.06059	0.117649
ENST00000158771.9-3-6_95	DERL2	-0.140167	0.491463
ENST00000170447.12-6-7_157	MKRN2	0.121057	0.539297
ENST00000170447.12-5-7_7	MKRN2	0.124039	0.363433
ENST00000170447.12-1-7_693	MKRN2	0.255836	0.108553
ENST00000170447.12-5-7_64	MKRN2	-0.0285952	0.691128
ENST00000170447.12-1-7_88	MKRN2	-0.104126	0.304855
ENST00000170447.12-2-7_62	MKRN2	0.808306	0.148229
ENST00000170447.12-6-7_351	MKRN2	0.307217	0.22451
ENST00000170447.12-1-7_188	MKRN2	0.0300638	0.614924
ENST00000170447.12-2-7_37	MKRN2	-0.447536	0.359269
ENST00000170447.12-2-7_47	MKRN2	0.0566915	0.486588
ENST00000170447.12-6-7_441	MKRN2	0.156767	0.538529
ENST00000170447.12-5-7_95	MKRN2	-0.986456	0.130145
ENST00000170447.12-5-7_38	MKRN2	-0.183622	0.346672
ENST00000170447.12-1-7_333	MKRN2	-0.0775854	0.558023
ENST00000171111.10-2-4_83	KEAP1	-0.324697	0.0994128
ENST00000171111.10-2-4_25	KEAP1	0.0990441	0.321494
ENST00000171111.10-2-4_8	KEAP1	0.397688	0.11842
ENST00000179259.6-1-5_552	TIGAR	-0.175745	0.115412
ENST00000179259.6-1-5_156	TIGAR	0.0681201	0.580001
ENST00000179259.6-1-5_492	TIGAR	0.091059	0.339659
ENST00000200181.8-22-38_54	ITGB4	0.14661	0.497982
ENST00000200181.8-5-38_27	ITGB4	-1.28537	0.169044
ENST00000200181.8-11-38_71	ITGB4	-0.0744184	0.667252
ENST00000200181.8-22-38_86	ITGB4	-0.441406	0.606409
ENST00000200181.8-22-38_30	ITGB4	0.119678	0.311294
ENST00000206595.11-7-13_20	G2E3	-0.0934936	0.43729
ENST00000206595.11-6-13_20	G2E3	0.187907	0.541021
ENST00000206595.11-9-13_15	G2E3	-0.21806	0.289954
ENST00000206595.11-4-13_25	G2E3	-0.545354	0.414512
ENST00000206595.11-7-13_71	G2E3	0.386331	0.251109
ENST00000206595.11-12-13_59	G2E3	-0.210305	0.339532
ENST00000206595.11-6-13_15	G2E3	0.13713	0.224252
ENST00000206595.11-12-13_68	G2E3	0.0379355	0.600028
ENST00000206595.11-9-13_78	G2E3	0.108672	0.115567
ENST00000206595.11-12-13_73	G2E3	-0.104403	0.160952
ENST00000206595.11-7-13_75	G2E3	-0.136598	0.40576
ENST00000206595.11-6-13_3	G2E3	0.0403729	0.615293
ENST00000206595.11-6-13_24	G2E3	0.113124	0.258887
ENST00000209884.5-6-10_147	KLHL20	0.156356	0.22173
ENST00000209884.5-4-10_97	KLHL20	0.216251	0.103252
ENST00000209884.5-7-10_216	KLHL20	-0.099631	0.671957
ENST00000209884.5-10-10_155	KLHL20	0.0744894	0.541357
ENST00000209884.5-6-10_130	KLHL20	0.656901	0.107026
ENST00000209884.5-7-10_155	KLHL20	0.196697	0.319424
ENST00000209884.5-6-10_63	KLHL20	-0.0768481	0.607797
ENST00000209884.5-4-10_17	KLHL20	0.0488212	0.608162
ENST00000209884.5-10-10_34	KLHL20	-0.235519	0.404838
ENST00000209884.5-7-10_105	KLHL20	-0.288191	0.142276
ENST00000209884.5-4-10_103	KLHL20	0.46271	0.551136
ENST00000209884.5-1-10_409	KLHL20	-0.197714	0.397696
ENST00000210313.8-5-9_74	PSMD5	-1.28773	0.102468
ENST00000210313.8-1-9_235	PSMD5	0.454957	0.579225
ENST00000210313.8-1-9_300	PSMD5	0.655941	0.418566
ENST00000210313.8-1-9_162	PSMD5	-0.20033	0.277476
ENST00000210313.8-1-9_79	PSMD5	-0.599886	0.475564
ENST00000210313.8-1-9_386	PSMD5	-0.199255	0.274534
ENST00000215071.8-5-6_147	PSMD8	-0.115001	0.268605
ENST00000215071.8-5-6_93	PSMD8	-0.340272	0.594641
ENST00000215071.8-3-6_113	PSMD8	0.0792263	0.299403
ENST00000215071.8-3-6_135	PSMD8	0.139317	0.301679
ENST00000215071.8-5-6_33	PSMD8	-0.318086	0.262869
ENST00000215574.9-4-4_309	CDC34	0.0304212	0.699883
ENST00000215574.9-3-4_47	CDC34	-0.492265	0.322199
ENST00000215574.9-3-4_109	CDC34	-0.442925	0.399135
ENST00000215574.9-4-4_391	CDC34	0.150489	0.377424
ENST00000215574.9-4-4_130	CDC34	-0.0797251	0.548651
ENST00000215574.9-4-4_473	CDC34	-0.0981011	0.690187
ENST00000215730.12-2-4_213	SNAP29	0.0569066	0.523928
ENST00000215730.12-2-4_31	SNAP29	-0.133231	0.222893
ENST00000216034.6-2-3_15	TOMM22	0.207185	0.431968
ENST00000216034.6-2-3_9	TOMM22	0.55347	0.244224
ENST00000216133.10-2-5_707	CBX7	0.38836	0.603446
ENST00000216133.10-3-5_87	CBX7	-0.152976	0.494387
ENST00000216133.10-3-5_178	CBX7	-0.176463	0.362436
ENST00000216133.10-3-5_163	CBX7	0.0980797	0.643901
ENST00000216218.8-7-11_4	ST13	0.052555	0.544777
ENST00000216218.8-1-11_196	ST13	-0.0929693	0.558621
ENST00000216218.8-7-11_13	ST13	-0.104473	0.640337
ENST00000216218.8-7-11_64	ST13	0.161057	0.378138
ENST00000216218.8-7-11_27	ST13	-0.256982	0.310945
ENST00000216218.8-1-11_265	ST13	0.305914	0.0954505
ENST00000216218.8-6-11_4	ST13	0.488437	0.483545
ENST00000216218.8-1-11_157	ST13	0.205124	0.487321
ENST00000216218.8-7-11_60	ST13	0.125427	0.140849
ENST00000216225.9-4-4_86	RBX1	0.0641715	0.499403
ENST00000216271.10-15-19_13	HDAC10	0.236853	0.455072
ENST00000216271.10-2-19_37	HDAC10	0.0846098	0.314807
ENST00000216271.10-6-19_9	HDAC10	-0.381166	0.250009
ENST00000216271.10-16-19_6	HDAC10	0.268529	0.629998
ENST00000216271.10-13-19_5	HDAC10	1.07499	0.121643
ENST00000216271.10-16-19_56	HDAC10	-0.250754	0.372965
ENST00000216271.10-4-19_12	HDAC10	0.14052	0.376699
ENST00000216271.10-11-19_2	HDAC10	-0.292525	0.28656
ENST00000216455.9-8-10_44	PSMA3	0.0513316	0.673482
ENST00000216455.9-8-10_61	PSMA3	-0.150567	0.503395
ENST00000216455.9-5-10_8	PSMA3	-0.14688	0.519321
ENST00000216455.9-5-10_23	PSMA3	0.104737	0.592501
ENST00000216455.9-8-10_83	PSMA3	0.589048	0.175493
ENST00000216455.9-2-10_22	PSMA3	-0.0697811	0.570694
ENST00000216455.9-8-10_42	PSMA3	0.591423	0.386598
ENST00000216455.9-5-10_103	PSMA3	-0.619735	0.232591
ENST00000216455.9-2-10_64	PSMA3	-0.174904	0.267826
ENST00000216455.9-5-10_64	PSMA3	0.157067	0.16669
ENST00000216479.8-1-8_133	AHSA1	0.0797173	0.650102
ENST00000216479.8-1-8_111	AHSA1	-0.105654	0.468542
ENST00000216479.8-1-8_70	AHSA1	0.41123	0.530859
ENST00000216879.8-2-8_418	NSFL1C	0.134898	0.608265
ENST00000216879.8-6-8_50	NSFL1C	0.548235	0.514812
ENST00000216879.8-8-8_15	NSFL1C	-0.944084	0.243401
ENST00000216879.8-7-8_194	NSFL1C	0.327687	0.522925
ENST00000216879.8-6-8_33	NSFL1C	0.404853	0.207114
ENST00000216879.8-2-8_186	NSFL1C	-0.462974	0.175483
ENST00000216879.8-3-8_71	NSFL1C	-0.324877	0.24629
ENST00000216879.8-8-8_144	NSFL1C	-0.246142	0.271471
ENST00000216879.8-3-8_49	NSFL1C	-0.278887	0.123755
ENST00000216879.8-8-8_193	NSFL1C	-0.438598	0.102762
ENST00000216879.8-7-8_249	NSFL1C	0.131838	0.639179
ENST00000217169.8-2-5_16	BIRC7	-0.303913	0.675728
ENST00000217169.8-2-5_42	BIRC7	0.570059	0.369685
ENST00000217244.9-9-11_50	CSNK2A1	0.0754273	0.639761
ENST00000217244.9-9-11_28	CSNK2A1	0.698645	0.148988
ENST00000217244.9-1-11_80	CSNK2A1	-0.904956	0.285648
ENST00000217244.9-1-11_61	CSNK2A1	-0.0974681	0.179302
ENST00000217244.9-1-11_53	CSNK2A1	-0.294613	0.269966
ENST00000217402.3-2-4_194	CHMP4B	0.56941	0.419118
ENST00000217402.3-2-4_180	CHMP4B	-0.128435	0.497137
ENST00000217740.4-1-5_157	RNF125	-0.085387	0.625508
ENST00000217740.4-1-5_836	RNF125	0.537822	0.131187
ENST00000217740.4-1-5_835	RNF125	-0.12239	0.479901
ENST00000217740.4-1-5_703	RNF125	1.11825	0.224887
ENST00000217740.4-3-5_38	RNF125	-0.287973	0.698294
ENST00000217958.8-4-4_17	PSMD10	0.280699	0.187322
ENST00000219313.9-6-6_32	PSMD7	0.0475924	0.498812
ENST00000219313.9-1-6_46	PSMD7	-0.239949	0.258548
ENST00000219313.9-6-6_63	PSMD7	-0.427694	0.363055
ENST00000219313.9-1-6_120	PSMD7	-0.28713	0.223772
ENST00000219473.12-6-13_2	USP10	0.103256	0.544516
ENST00000219473.12-10-13_65	USP10	-0.0880887	0.70983
ENST00000219473.12-10-13_46	USP10	0.176905	0.506691
ENST00000219473.12-10-13_227	USP10	0.599292	0.139101
ENST00000219548.9-3-6_13	STUB1	0.403835	0.591811
ENST00000219548.9-3-6_8	STUB1	-0.163571	0.311001
ENST00000219596.6-6-9_60	MEFV	0.647916	0.456808
ENST00000220509.10-2-4_49	VPS18	0.220145	0.551102
ENST00000220509.10-2-4_24	VPS18	-0.651296	0.380309
ENST00000221200.9-2-11_14	KCTD9	0.225772	0.403115
ENST00000221200.9-4-11_2	KCTD9	0.304559	0.633279
ENST00000221200.9-4-11_19	KCTD9	0.471643	0.16885
ENST00000221200.9-2-11_59	KCTD9	-0.180775	0.467723
ENST00000221200.9-2-11_77	KCTD9	-0.0930201	0.59761
ENST00000221265.8-11-13_41	PAF1	-0.24994	0.0952178
ENST00000221265.8-1-13_74	PAF1	0.112934	0.453795
ENST00000221265.8-1-13_65	PAF1	0.23891	0.257754
ENST00000221265.8-5-13_7	PAF1	0.445544	0.474095
ENST00000221265.8-11-13_98	PAF1	0.240345	0.117634
ENST00000221265.8-1-13_40	PAF1	-0.0463486	0.687181
ENST00000221265.8-3-13_40	PAF1	-0.280396	0.138093
ENST00000221265.8-3-13_31	PAF1	-0.265346	0.57581
ENST00000221265.8-11-13_80	PAF1	0.0930971	0.706672
ENST00000221265.8-9-13_5	PAF1	0.192943	0.694686
ENST00000221265.8-10-13_12	PAF1	0.256496	0.461604
ENST00000221265.8-11-13_108	PAF1	-0.372054	0.12834
ENST00000221265.8-11-13_31	PAF1	0.117023	0.302453
ENST00000221543.10-5-16_15	TBC1D17	0.158383	0.536643
ENST00000221543.10-5-16_56	TBC1D17	-0.311725	0.139395
ENST00000221543.10-9-16_48	TBC1D17	-0.0674016	0.694277
ENST00000221543.10-5-16_38	TBC1D17	-0.0810749	0.533241
ENST00000221566.7-8-9_51	SGTA	0.0715681	0.445979
ENST00000221566.7-8-9_80	SGTA	0.0937514	0.362395
ENST00000221566.7-5-9_86	SGTA	-0.120098	0.507738
ENST00000221566.7-4-9_42	SGTA	-0.151638	0.417472
ENST00000221566.7-8-9_94	SGTA	-0.161873	0.427219
ENST00000221566.7-4-9_31	SGTA	0.0691909	0.626792
ENST00000221566.7-5-9_197	SGTA	-0.0977637	0.553933
ENST00000221566.7-5-9_188	SGTA	0.100585	0.675784
ENST00000221566.7-9-9_28	SGTA	0.323711	0.170517
ENST00000221943.14-2-5_68	DMAC2	0.480178	0.481253
ENST00000221943.14-5-5_14	DMAC2	0.349261	0.69839
ENST00000221943.14-2-5_81	DMAC2	0.256676	0.410059
ENST00000221943.14-5-5_43	DMAC2	-0.449269	0.291202
ENST00000221943.14-2-5_62	DMAC2	-0.277659	0.481243
ENST00000221943.14-2-5_13	DMAC2	-0.080576	0.417687
ENST00000221943.14-3-5_64	DMAC2	0.658632	0.23901
ENST00000221943.14-3-5_24	DMAC2	0.247104	0.141579
ENST00000221943.14-3-5_29	DMAC2	0.310683	0.690564
ENST00000221943.14-5-5_28	DMAC2	-0.213641	0.362708
ENST00000222402.8-6-6_65	UBE2D4	0.48763	0.551749
ENST00000222402.8-6-6_158	UBE2D4	0.291211	0.444656
ENST00000223321.9-1-7_352	PSMA2	0.220586	0.312514
ENST00000223321.9-4-7_37	PSMA2	0.14955	0.478234
ENST00000223321.9-4-7_10	PSMA2	-0.0603744	0.701404
ENST00000223321.9-3-7_53	PSMA2	-0.0796948	0.686194
ENST00000223321.9-6-7_105	PSMA2	-0.0809526	0.353094
ENST00000223321.9-4-7_13	PSMA2	0.206376	0.50001
ENST00000223321.9-4-7_6	PSMA2	-0.183406	0.210598
ENST00000225174.8-5-5_185	PPIF	0.471546	0.293743
ENST00000225726.10-8-11_22	CCDC47	0.0763165	0.346115
ENST00000225726.10-8-11_46	CCDC47	-0.350704	0.341677
ENST00000225726.10-8-11_12	CCDC47	-0.0631087	0.507928
ENST00000225728.8-3-3_10	MED31	-0.19784	0.469378
ENST00000225873.9-2-2_41	PEX12	-0.964289	0.114104
ENST00000225873.9-2-2_6	PEX12	0.717955	0.278996
ENST00000225873.9-2-2_28	PEX12	-0.0833829	0.596778
ENST00000226225.7-4-5_40	TNFAIP1	0.374929	0.249018
ENST00000226225.7-4-5_73	TNFAIP1	0.719573	0.162163
ENST00000226225.7-4-5_19	TNFAIP1	-0.0954596	0.17531
ENST00000226225.7-4-5_33	TNFAIP1	-0.421084	0.523128
ENST00000226725.11-1-14_243	KLHL2	0.206192	0.505642
ENST00000226725.11-2-14_24	KLHL2	-0.163489	0.565494
ENST00000226725.11-2-14_83	KLHL2	0.127141	0.504045
ENST00000226725.11-1-14_344	KLHL2	0.421351	0.219977
ENST00000227451.4-2-8_34	DTX4	-0.0365196	0.640469
ENST00000227451.4-2-8_538	DTX4	-0.694366	0.403715
ENST00000227451.4-2-8_155	DTX4	0.634196	0.459558
ENST00000227451.4-2-8_395	DTX4	-0.0404561	0.617421
ENST00000228495.11-5-6_103	KCTD10	-0.207467	0.409728
ENST00000228495.11-5-6_16	KCTD10	-0.1341	0.350659
ENST00000228495.11-5-6_8	KCTD10	-0.393329	0.324388
ENST00000229268.13-19-19_28	USP5	0.371784	0.283333
ENST00000229268.13-8-19_23	USP5	-0.39821	0.636671
ENST00000229268.13-8-19_35	USP5	-0.140011	0.327045
ENST00000229268.13-13-19_100	USP5	0.411469	0.217492
ENST00000229268.13-8-19_55	USP5	0.0397354	0.597984
ENST00000229268.13-5-19_43	USP5	-0.284317	0.252182
ENST00000229268.13-5-19_33	USP5	0.174942	0.536811
ENST00000229268.13-8-19_70	USP5	0.0462632	0.437782
ENST00000229268.13-13-19_79	USP5	0.207792	0.375255
ENST00000229268.13-9-19_24	USP5	-0.22484	0.554792
ENST00000229328.10-2-6_18	PRKAB1	0.176792	0.238276
ENST00000229328.10-2-6_50	PRKAB1	0.0702301	0.37768
ENST00000229758.8-2-4_3	FBXO5	-0.0792788	0.659541
ENST00000229758.8-2-4_26	FBXO5	0.0759834	0.344716
ENST00000229758.8-2-4_50	FBXO5	-0.0926746	0.490326
ENST00000230895.11-2-3_375	DAP	0.173893	0.539489
ENST00000230895.11-2-3_2160	DAP	0.51907	0.361279
ENST00000231368.10-12-17_39	LNPEP	0.111394	0.378102
ENST00000231368.10-16-17_52	LNPEP	-0.425625	0.155892
ENST00000231368.10-14-17_5	LNPEP	0.0948989	0.404498
ENST00000231368.10-12-17_2	LNPEP	0.106925	0.606288
ENST00000231368.10-2-17_83	LNPEP	-0.255071	0.205418
ENST00000231368.10-15-17_68	LNPEP	-0.0833079	0.622832
ENST00000231368.10-12-17_16	LNPEP	0.105412	0.546968
ENST00000231368.10-10-17_8	LNPEP	-0.212448	0.485881
ENST00000231368.10-15-17_13	LNPEP	0.107289	0.374137
ENST00000231368.10-15-17_38	LNPEP	0.584607	0.165882
ENST00000231368.10-12-17_24	LNPEP	-0.0901553	0.497153
ENST00000231368.10-16-17_24	LNPEP	0.204149	0.654263
ENST00000231749.8-11-11_10	ZMYND10	0.370237	0.578829
ENST00000231749.8-1-11_51	ZMYND10	-0.263044	0.279269
ENST00000231749.8-1-11_30	ZMYND10	0.102227	0.612531
ENST00000231948.8-10-10_30	CRBN	0.216732	0.497297
ENST00000231948.8-3-10_22	CRBN	-0.268774	0.452538
ENST00000231948.8-4-10_32	CRBN	0.193067	0.445864
ENST00000231948.8-9-10_22	CRBN	-0.148835	0.449411
ENST00000231948.8-9-10_54	CRBN	0.0665736	0.50368
ENST00000231948.8-4-10_212	CRBN	-0.70709	0.346266
ENST00000231948.8-10-10_26	CRBN	-0.103309	0.27661
ENST00000231948.8-3-10_47	CRBN	-0.644707	0.434013
ENST00000231948.8-9-10_10	CRBN	0.251785	0.339438
ENST00000231948.8-3-10_43	CRBN	-0.113464	0.441101
ENST00000231948.8-9-10_47	CRBN	0.0783939	0.436187
ENST00000232461.8-5-7_52	GNAT1	-0.12537	0.413128
ENST00000232461.8-5-7_29	GNAT1	-0.0400549	0.667692
ENST00000232461.8-4-7_2	GNAT1	-0.137586	0.667189
ENST00000232564.8-3-8_18	GNB4	-0.150813	0.494925
ENST00000232564.8-3-8_110	GNB4	0.252221	0.43842
ENST00000232744.13-1-11_222	ABTB1	0.415757	0.137941
ENST00000232744.13-1-11_197	ABTB1	0.0650607	0.525625
ENST00000232744.13-2-11_4	ABTB1	-0.677944	0.314887
ENST00000232744.13-1-11_123	ABTB1	0.0554826	0.66403
ENST00000232744.13-1-11_106	ABTB1	-0.0919793	0.594746
ENST00000232744.13-4-11_19	ABTB1	0.437095	0.336593
ENST00000232744.13-4-11_4	ABTB1	-0.251492	0.609074
ENST00000232766.6-3-9_388	KLHL18	0.331178	0.28989
ENST00000232766.6-7-9_328	KLHL18	-0.0905907	0.24032
ENST00000232766.6-8-9_122	KLHL18	0.0534735	0.47769
ENST00000232766.6-8-9_45	KLHL18	-0.0404202	0.632661
ENST00000232766.6-3-9_232	KLHL18	0.149546	0.518022
ENST00000232766.6-2-9_83	KLHL18	-0.110562	0.352846
ENST00000232766.6-5-9_145	KLHL18	0.0340174	0.576495
ENST00000232766.6-7-9_9	KLHL18	-0.0903215	0.3961
ENST00000232766.6-8-9_89	KLHL18	0.109982	0.283538
ENST00000232766.6-2-9_174	KLHL18	0.132307	0.0932591
ENST00000232766.6-5-9_19	KLHL18	0.537781	0.147187
ENST00000232766.6-8-9_57	KLHL18	0.211011	0.541485
ENST00000232766.6-5-9_122	KLHL18	0.0802679	0.384828
ENST00000232766.6-3-9_445	KLHL18	0.0715875	0.424056
ENST00000232978.13-14-15_28	NKTR	-0.439258	0.45461
ENST00000232978.13-11-15_80	NKTR	-0.115097	0.363723
ENST00000232978.13-15-15_81	NKTR	-0.781194	0.249889
ENST00000232978.13-8-15_23	NKTR	0.045299	0.548653
ENST00000232978.13-15-15_156	NKTR	-1.18434	0.117719
ENST00000232978.13-13-15_17	NKTR	0.471392	0.401803
ENST00000232978.13-12-15_73	NKTR	-0.359793	0.546324
ENST00000232978.13-9-15_4	NKTR	-0.397229	0.127952
ENST00000232978.13-15-15_5	NKTR	0.264106	0.674401
ENST00000232978.13-11-15_24	NKTR	0.218669	0.706676
ENST00000232978.13-13-15_25	NKTR	0.116996	0.502462
ENST00000232978.13-11-15_65	NKTR	0.103464	0.262918
ENST00000232978.13-9-15_28	NKTR	-0.103448	0.471421
ENST00000232978.13-14-15_17	NKTR	-0.195431	0.454255
ENST00000232978.13-9-15_32	NKTR	-0.647288	0.147919
ENST00000232978.13-11-15_39	NKTR	-0.431361	0.515068
ENST00000232978.13-13-15_11	NKTR	0.070803	0.630803
ENST00000232978.13-5-15_244	NKTR	1.29692	0.134155
ENST00000232978.13-5-15_17	NKTR	-1.02439	0.162077
ENST00000232978.13-14-15_33	NKTR	0.073367	0.582591
ENST00000232978.13-13-15_64	NKTR	0.133721	0.449468
ENST00000233630.11-5-8_7	PCGF1	-0.433419	0.523227
ENST00000233741.9-5-13_844	FANCL	-0.259673	0.656161
ENST00000233741.9-2-13_20	FANCL	0.219323	0.247019
ENST00000233741.9-10-13_2	FANCL	0.417806	0.223098
ENST00000233741.9-2-13_121	FANCL	0.902789	0.299945
ENST00000233741.9-5-13_248	FANCL	-0.173787	0.262794
ENST00000233741.9-5-13_437	FANCL	-0.137431	0.259153
ENST00000233741.9-5-13_567	FANCL	-0.283479	0.284025
ENST00000233741.9-2-13_93	FANCL	-0.147011	0.349543
ENST00000233741.9-2-13_84	FANCL	0.0818814	0.567442
ENST00000234831.10-6-7_162	TMEM59	-0.284775	0.258044
ENST00000234831.10-6-7_89	TMEM59	-0.214729	0.222703
ENST00000234831.10-6-7_35	TMEM59	-0.0596077	0.532317
ENST00000234831.10-6-7_118	TMEM59	-0.21051	0.474665
ENST00000235150.5-1-8_643	RNF19B	0.159413	0.547837
ENST00000235150.5-8-8_17	RNF19B	-0.628388	0.294868
ENST00000235150.5-7-8_147	RNF19B	-1.22038	0.159337
ENST00000235150.5-1-8_544	RNF19B	0.179211	0.486994
ENST00000235150.5-7-8_139	RNF19B	0.261961	0.446016
ENST00000235150.5-3-8_91	RNF19B	-0.153721	0.557488
ENST00000235150.5-8-8_25	RNF19B	-0.635904	0.307258
ENST00000235150.5-3-8_36	RNF19B	-0.811133	0.141578
ENST00000235150.5-1-8_437	RNF19B	-0.0921368	0.309036
ENST00000235150.5-1-8_722	RNF19B	-0.529318	0.51622
ENST00000235150.5-7-8_237	RNF19B	0.33702	0.660587
ENST00000235150.5-8-8_43	RNF19B	0.244578	0.704081
ENST00000235150.5-7-8_247	RNF19B	-0.486256	0.455108
ENST00000235329.10-15-16_108	MFN2	0.0479014	0.67234
ENST00000235329.10-4-16_33	MFN2	-0.611037	0.235986
ENST00000235329.10-4-16_5	MFN2	-0.0853648	0.621652
ENST00000235329.10-9-16_28	MFN2	-0.081935	0.210676
ENST00000235329.10-9-16_164	MFN2	-0.0679983	0.499573
ENST00000235329.10-2-16_157	MFN2	-0.514935	0.527875
ENST00000235329.10-15-16_28	MFN2	0.0517328	0.669309
ENST00000235329.10-2-16_123	MFN2	-0.889301	0.1881
ENST00000235329.10-2-16_129	MFN2	-0.281997	0.152273
ENST00000235329.10-9-16_102	MFN2	-0.283228	0.126284
ENST00000235329.10-15-16_140	MFN2	0.125809	0.527578
ENST00000235329.10-4-16_55	MFN2	-0.0512158	0.600848
ENST00000235329.10-16-16_143	MFN2	0.0503024	0.652643
ENST00000235329.10-16-16_205	MFN2	-0.155695	0.127406
ENST00000237455.5-3-3_154	RNF103	-0.148635	0.398729
ENST00000237455.5-3-3_257	RNF103	-0.761323	0.247316
ENST00000237455.5-3-3_281	RNF103	-0.407729	0.355101
ENST00000237455.5-3-3_119	RNF103	-0.0705402	0.589242
ENST00000238497.10-3-10_26	VPS4B	-0.106231	0.492414
ENST00000238497.10-8-10_34	VPS4B	0.237098	0.117616
ENST00000238497.10-3-10_63	VPS4B	0.0694976	0.476958
ENST00000238497.10-3-10_220	VPS4B	-0.133477	0.401218
ENST00000238497.10-8-10_50	VPS4B	-0.70537	0.158703
ENST00000238497.10-3-10_119	VPS4B	-0.0875669	0.636794
ENST00000238497.10-3-10_172	VPS4B	-0.662225	0.283759
ENST00000239878.9-2-5_98	UFM1	0.114883	0.513585
ENST00000239878.9-2-5_158	UFM1	-0.213732	0.313757
ENST00000242209.9-1-9_167	FKBP9	-0.394797	0.318751
ENST00000242209.9-5-9_45	FKBP9	0.153211	0.446083
ENST00000242209.9-5-9_28	FKBP9	0.308893	0.229938
ENST00000242209.9-7-9_12	FKBP9	-0.345082	0.351168
ENST00000242209.9-1-9_133	FKBP9	-0.535212	0.3788
ENST00000242209.9-1-9_241	FKBP9	-0.028193	0.691201
ENST00000242209.9-3-9_1	FKBP9	0.117577	0.652098
ENST00000242209.9-5-9_39	FKBP9	0.0787478	0.288098
ENST00000242719.4-2-2_28	RNF11	0.0937527	0.665333
ENST00000242719.4-2-2_10	RNF11	-0.109324	0.366483
ENST00000242810.11-1-5_242	KLHL24	0.0919567	0.54659
ENST00000242810.11-1-5_492	KLHL24	-0.256669	0.309821
ENST00000244061.6-1-5_87	RNF114	0.131505	0.481654
ENST00000244061.6-1-5_265	RNF114	0.31947	0.472809
ENST00000244061.6-3-5_19	RNF114	-0.0891827	0.712741
ENST00000244061.6-1-5_71	RNF114	0.0733338	0.311492
ENST00000244061.6-3-5_4	RNF114	-0.674993	0.411681
ENST00000244061.6-3-5_11	RNF114	0.446528	0.104013
ENST00000244061.6-1-5_207	RNF114	-0.0472434	0.449052
ENST00000246957.10-6-17_50	TRAP1	0.146309	0.29994
ENST00000246957.10-16-17_64	TRAP1	-0.0314546	0.672248
ENST00000246957.10-11-17_283	TRAP1	0.0333464	0.69584
ENST00000246957.10-16-17_35	TRAP1	-0.264825	0.701457
ENST00000246957.10-16-17_77	TRAP1	-0.172973	0.345288
ENST00000246957.10-6-17_182	TRAP1	-0.162294	0.571248
ENST00000246957.10-16-17_92	TRAP1	0.108246	0.253444
ENST00000246957.10-16-17_188	TRAP1	-0.0636858	0.545961
ENST00000246957.10-11-17_410	TRAP1	-0.0882467	0.300882
ENST00000247178.6-9-9_559	ATG14	-0.106096	0.254552
ENST00000247178.6-2-9_66	ATG14	-0.262571	0.167822
ENST00000247178.6-9-9_365	ATG14	0.290911	0.165408
ENST00000247178.6-2-9_14	ATG14	0.15323	0.554695
ENST00000247178.6-2-9_58	ATG14	-0.0318537	0.64881
ENST00000247178.6-1-9_748	ATG14	0.243587	0.240145
ENST00000247178.6-5-9_50	ATG14	-0.0593203	0.514233
ENST00000247178.6-7-9_23	ATG14	-0.21956	0.390162
ENST00000247178.6-1-9_740	ATG14	-0.0935956	0.526436
ENST00000247178.6-5-9_92	ATG14	-0.309149	0.170121
ENST00000247178.6-9-9_424	ATG14	-0.348329	0.133009
ENST00000247178.6-5-9_164	ATG14	-0.358294	0.684595
ENST00000247461.9-2-13_9	CANX	0.201981	0.637018
ENST00000247461.9-8-13_14	CANX	0.664568	0.354181
ENST00000247461.9-2-13_4	CANX	0.17911	0.450168
ENST00000247461.9-4-13_17	CANX	-0.253898	0.368969
ENST00000247461.9-8-13_3	CANX	-0.0716295	0.299114
ENST00000247461.9-2-13_27	CANX	0.0637012	0.67712
ENST00000247461.9-8-13_23	CANX	-0.394785	0.383046
ENST00000247461.9-7-13_66	CANX	0.159895	0.526811
ENST00000247461.9-7-13_45	CANX	0.283994	0.279233
ENST00000247461.9-7-13_93	CANX	-0.105101	0.144114
ENST00000247461.9-7-13_68	CANX	0.204764	0.439873
ENST00000247461.9-2-13_33	CANX	0.0974558	0.341986
ENST00000247668.7-1-9_29	TRAF2	-0.484866	0.140555
ENST00000247668.7-1-9_50	TRAF2	-0.162857	0.549315
ENST00000247668.7-1-9_47	TRAF2	-0.101646	0.399979
ENST00000247977.9-1-2_10	FBXL12	0.226638	0.51702
ENST00000248139.8-2-5_22	RAB40C	0.134836	0.685773
ENST00000248139.8-2-5_87	RAB40C	0.912996	0.235702
ENST00000248139.8-2-5_54	RAB40C	0.607241	0.287404
ENST00000248553.7-2-2_6	HSPB1	0.0941432	0.586388
ENST00000248566.3-2-2_162	SEM1	-0.278024	0.205428
ENST00000248566.3-2-2_216	SEM1	-0.306338	0.658009
ENST00000248566.3-2-2_210	SEM1	0.779797	0.125463
ENST00000248566.3-2-2_25	SEM1	0.352274	0.14101
ENST00000250495.10-3-3_19	NEDD8	-0.332472	0.66992
ENST00000250495.10-3-3_29	NEDD8	-0.49836	0.168504
ENST00000250495.10-3-3_27	NEDD8	-0.116776	0.508612
ENST00000251047.6-10-12_24	LMAN1	-0.782211	0.169688
ENST00000251047.6-4-12_4	LMAN1	0.365301	0.154091
ENST00000251047.6-4-12_30	LMAN1	-0.0537792	0.485476
ENST00000251047.6-4-12_42	LMAN1	-0.0838499	0.31577
ENST00000251047.6-10-12_167	LMAN1	-0.0848103	0.182484
ENST00000251047.6-10-12_116	LMAN1	-0.83387	0.344157
ENST00000251047.6-12-12_4	LMAN1	0.453261	0.439959
ENST00000251968.4-6-9_121	TSG101	0.154652	0.357864
ENST00000251968.4-6-9_132	TSG101	0.246211	0.594744
ENST00000251968.4-6-9_60	TSG101	0.505057	0.287422
ENST00000252015.3-13-18_120	TRPC4AP	-0.44687	0.247151
ENST00000252015.3-11-18_276	TRPC4AP	-0.417243	0.293581
ENST00000252015.3-13-18_55	TRPC4AP	-0.0692742	0.32528
ENST00000252015.3-13-18_159	TRPC4AP	-0.100086	0.43594
ENST00000252015.3-11-18_251	TRPC4AP	0.439804	0.339027
ENST00000252015.3-13-18_69	TRPC4AP	-0.647423	0.321031
ENST00000252015.3-12-18_159	TRPC4AP	-1.10908	0.159645
ENST00000252037.5-7-7_65	FKBP6	-0.595882	0.261282
ENST00000252050.9-23-39_20	CUL9	-0.244241	0.553576
ENST00000252050.9-29-39_92	CUL9	0.106148	0.331726
ENST00000252050.9-7-39_139	CUL9	-0.940628	0.261127
ENST00000252050.9-15-39_90	CUL9	-0.697984	0.116161
ENST00000252050.9-23-39_7	CUL9	0.274887	0.374038
ENST00000252050.9-11-39_5	CUL9	0.206947	0.359255
ENST00000252050.9-23-39_14	CUL9	0.463346	0.209193
ENST00000252050.9-33-39_28	CUL9	-0.490175	0.315855
ENST00000252050.9-18-39_24	CUL9	0.460144	0.32273
ENST00000252050.9-18-39_33	CUL9	-0.206394	0.670577
ENST00000252050.9-9-39_21	CUL9	0.0827282	0.356781
ENST00000252050.9-23-39_33	CUL9	-0.442811	0.588506
ENST00000252050.9-29-39_89	CUL9	0.232722	0.35456
ENST00000252050.9-9-39_31	CUL9	0.396484	0.460809
ENST00000252050.9-15-39_72	CUL9	-0.157123	0.52786
ENST00000252108.8-11-18_43	UBE4A	-0.146704	0.272638
ENST00000252108.8-9-18_27	UBE4A	-0.281314	0.702569
ENST00000252108.8-9-18_24	UBE4A	0.173138	0.385086
ENST00000252108.8-9-18_50	UBE4A	0.351475	0.115893
ENST00000252108.8-18-18_59	UBE4A	0.342778	0.17527
ENST00000252108.8-16-18_16	UBE4A	0.0765828	0.469412
ENST00000252108.8-16-18_26	UBE4A	-0.219968	0.16609
ENST00000252108.8-9-18_37	UBE4A	0.0288562	0.699116
ENST00000252108.8-11-18_11	UBE4A	0.0416837	0.510758
ENST00000252108.8-16-18_2	UBE4A	-0.174236	0.565962
ENST00000252744.6-10-13_46	ZSWIM6	0.461765	0.202771
ENST00000252744.6-10-13_21	ZSWIM6	0.1246	0.507686
ENST00000253023.8-4-5_15	UBE2M	-0.0848525	0.520429
ENST00000253023.8-4-5_41	UBE2M	0.10265	0.663101
ENST00000253023.8-4-5_6	UBE2M	0.702232	0.441994
ENST00000253024.10-11-16_7	TRIM28	-0.57366	0.386684
ENST00000253024.10-5-16_5	TRIM28	0.0341783	0.702178
ENST00000253496.4-10-13_12	F12	-0.121679	0.348826
ENST00000253496.4-3-13_27	F12	-0.83034	0.313122
ENST00000253496.4-10-13_5	F12	0.0916145	0.571147
ENST00000253794.7-1-5_35	VPS25	0.0550266	0.572671
ENST00000253794.7-1-5_19	VPS25	-0.209924	0.104813
ENST00000254323.6-9-12_41	ZSWIM4	-0.135739	0.219895
ENST00000254337.10-10-12_36	DCAF15	-0.716472	0.26116
ENST00000254337.10-10-12_13	DCAF15	0.340954	0.137001
ENST00000254436.8-4-5_40	TRIM21	-0.0285304	0.704104
ENST00000254950.13-3-10_24	VPS4A	-0.0418099	0.567298
ENST00000254950.13-6-10_110	VPS4A	0.244746	0.593352
ENST00000254950.13-6-10_59	VPS4A	0.0882824	0.361716
ENST00000254950.13-6-10_90	VPS4A	-0.220885	0.599859
ENST00000254950.13-8-10_7	VPS4A	-0.227843	0.263182
ENST00000254950.13-3-10_267	VPS4A	-0.0724486	0.257843
ENST00000254950.13-6-10_69	VPS4A	-0.0662355	0.472813
ENST00000254950.13-8-10_31	VPS4A	-0.121804	0.587599
ENST00000255499.3-4-6_22	RNF128	0.781125	0.322295
ENST00000255764.4-2-3_23	MED10	0.264116	0.13649
ENST00000255764.4-1-3_79	MED10	0.0519355	0.538043
ENST00000255764.4-1-3_17	MED10	0.0532899	0.539977
ENST00000255764.4-2-3_144	MED10	-0.14484	0.369173
ENST00000255764.4-1-3_38	MED10	-0.192984	0.447779
ENST00000255764.4-1-3_40	MED10	0.103167	0.638291
ENST00000255764.4-2-3_100	MED10	-0.0399077	0.678622
ENST00000255977.7-6-7_25	MKRN1	-0.189282	0.294519
ENST00000255977.7-2-7_378	MKRN1	-0.0821474	0.364117
ENST00000255977.7-1-7_45	MKRN1	-0.0617244	0.622778
ENST00000255977.7-5-7_15	MKRN1	0.70258	0.172936
ENST00000255977.7-5-7_26	MKRN1	-0.0790802	0.627653
ENST00000255977.7-5-7_41	MKRN1	0.140541	0.170814
ENST00000255977.7-1-7_243	MKRN1	0.0836792	0.572749
ENST00000255977.7-1-7_155	MKRN1	-0.104751	0.575786
ENST00000255977.7-5-7_2	MKRN1	-0.145952	0.373113
ENST00000255977.7-2-7_231	MKRN1	-0.0347547	0.657218
ENST00000255977.7-2-7_108	MKRN1	-0.144629	0.578197
ENST00000255977.7-6-7_55	MKRN1	0.406581	0.184745
ENST00000255977.7-2-7_116	MKRN1	0.697143	0.322008
ENST00000256190.12-24-39_178	SBF2	0.147577	0.516653
ENST00000256190.12-7-39_49	SBF2	0.842471	0.345807
ENST00000256190.12-26-39_151	SBF2	-0.039671	0.662551
ENST00000256257.2-5-5_5	RNF122	0.195486	0.24736
ENST00000256257.2-5-5_35	RNF122	-0.368222	0.431646
ENST00000256257.2-5-5_19	RNF122	0.231022	0.662324
ENST00000256257.2-2-5_99	RNF122	0.151227	0.497799
ENST00000256257.2-2-5_248	RNF122	-0.861154	0.138519
ENST00000256379.10-2-7_11	MED6	0.0531905	0.541076
ENST00000256496.8-3-6_6	ARL8B	0.362129	0.444325
ENST00000256496.8-5-6_2	ARL8B	1.00056	0.16708
ENST00000256497.9-9-11_33	EDEM1	0.0880447	0.616908
ENST00000256497.9-6-11_112	EDEM1	-0.409056	0.283577
ENST00000256497.9-3-11_60	EDEM1	-0.789157	0.105592
ENST00000256497.9-6-11_73	EDEM1	-0.193383	0.487163
ENST00000256497.9-1-11_511	EDEM1	-0.395151	0.0930728
ENST00000256497.9-6-11_51	EDEM1	0.313163	0.274941
ENST00000256497.9-1-11_139	EDEM1	0.441696	0.0996195
ENST00000256497.9-9-11_56	EDEM1	-0.122498	0.68293
ENST00000256497.9-1-11_92	EDEM1	0.131549	0.3598
ENST00000256497.9-1-11_503	EDEM1	0.303023	0.454619
ENST00000256497.9-3-11_15	EDEM1	-0.449531	0.355577
ENST00000256649.9-1-5_125	TRIM45	0.998423	0.216656
ENST00000256649.9-1-5_17	TRIM45	0.288469	0.694534
ENST00000256649.9-3-5_34	TRIM45	0.198858	0.200475
ENST00000256649.9-3-5_24	TRIM45	-0.314171	0.603796
ENST00000256649.9-1-5_77	TRIM45	-1.26299	0.115316
ENST00000256649.9-3-5_41	TRIM45	-0.317329	0.562012
ENST00000256996.9-4-9_40	DDB2	0.613975	0.348349
ENST00000256996.9-4-9_174	DDB2	-0.294158	0.158073
ENST00000256996.9-4-9_48	DDB2	-0.273451	0.494629
ENST00000257118.5-11-13_3	PHC2	-0.0307899	0.707336
ENST00000257118.5-11-13_92	PHC2	-0.0436509	0.507461
ENST00000257118.5-11-13_139	PHC2	0.286631	0.536088
ENST00000257548.10-12-12_20	USP30	-0.187	0.363331
ENST00000257548.10-12-12_4	USP30	-0.468674	0.167915
ENST00000257548.10-1-12_145	USP30	0.108615	0.613998
ENST00000257548.10-1-12_189	USP30	0.104733	0.678008
ENST00000257548.10-1-12_337	USP30	-0.0933048	0.670211
ENST00000257575.9-5-9_324	RNFT2	-0.29325	0.12093
ENST00000257575.9-5-9_209	RNFT2	0.069008	0.618579
ENST00000257575.9-2-9_671	RNFT2	0.110283	0.395981
ENST00000257575.9-2-9_369	RNFT2	-0.305479	0.255507
ENST00000257575.9-5-9_146	RNFT2	-0.0909799	0.652642
ENST00000257600.3-2-8_1559	DTX1	0.0400485	0.682624
ENST00000257600.3-2-8_525	DTX1	0.336711	0.297847
ENST00000257600.3-2-8_1268	DTX1	-0.314315	0.69352
ENST00000258091.10-5-11_23	CCT7	0.0628483	0.514816
ENST00000258091.10-9-11_22	CCT7	0.160845	0.334696
ENST00000258091.10-5-11_10	CCT7	0.445871	0.140956
ENST00000258091.10-9-11_31	CCT7	0.236358	0.316242
ENST00000258091.10-9-11_39	CCT7	-0.19334	0.625784
ENST00000258091.10-5-11_1	CCT7	-0.593875	0.461533
ENST00000258091.10-5-11_34	CCT7	-0.115203	0.675415
ENST00000258091.10-9-11_30	CCT7	-0.944428	0.205119
ENST00000258091.10-9-11_14	CCT7	-0.0902885	0.548144
ENST00000258198.7-1-12_19	DYNC1LI2	-0.0946003	0.286926
ENST00000258198.7-7-12_120	DYNC1LI2	0.344526	0.409217
ENST00000258198.7-7-12_73	DYNC1LI2	0.373065	0.112792
ENST00000258198.7-7-12_214	DYNC1LI2	-0.0829927	0.601908
ENST00000258198.7-7-12_164	DYNC1LI2	-0.0837253	0.356308
ENST00000258200.8-1-1_41	FBXL8	0.288777	0.500674
ENST00000258200.8-1-1_54	FBXL8	-0.414478	0.635446
ENST00000258200.8-1-1_35	FBXL8	-0.708155	0.1314
ENST00000258534.13-1-6_252	DRAM1	0.809861	0.14604
ENST00000258534.13-1-6_67	DRAM1	0.137523	0.245059
ENST00000258534.13-1-6_831	DRAM1	-0.299985	0.453917
ENST00000258534.13-1-6_952	DRAM1	0.833934	0.276025
ENST00000258947.8-5-11_25	CALCOCO2	-0.0714189	0.48607
ENST00000258947.8-5-11_32	CALCOCO2	0.213314	0.192243
ENST00000259253.11-15-40_178	UGGT1	0.127268	0.304764
ENST00000259253.11-12-40_62	UGGT1	-0.0638514	0.698433
ENST00000259253.11-15-40_88	UGGT1	-0.258983	0.408001
ENST00000259253.11-26-40_35	UGGT1	-0.153907	0.107425
ENST00000259253.11-25-40_149	UGGT1	-0.1869	0.191998
ENST00000259253.11-37-40_13	UGGT1	0.141365	0.540813
ENST00000259253.11-2-40_31	UGGT1	0.378719	0.248091
ENST00000259253.11-2-40_286	UGGT1	-0.699213	0.373944
ENST00000259253.11-31-40_114	UGGT1	-0.199735	0.301685
ENST00000259253.11-31-40_14	UGGT1	-0.24603	0.590729
ENST00000259253.11-34-40_27	UGGT1	0.274761	0.302176
ENST00000259253.11-12-40_61	UGGT1	0.0961933	0.571048
ENST00000259253.11-8-40_15	UGGT1	-0.390391	0.29303
ENST00000259253.11-10-40_46	UGGT1	-0.245093	0.0957596
ENST00000259253.11-28-40_55	UGGT1	0.0705261	0.553168
ENST00000259339.7-3-4_24	TOR1B	-0.366046	0.425563
ENST00000259339.7-3-4_41	TOR1B	-0.0525782	0.517492
ENST00000259339.7-3-4_52	TOR1B	-0.273121	0.580779
ENST00000259339.7-3-4_17	TOR1B	0.0362218	0.701222
ENST00000259339.7-3-4_50	TOR1B	0.200755	0.15864
ENST00000259457.8-4-7_303	PSMB7	-0.0925625	0.698323
ENST00000259457.8-7-7_314	PSMB7	0.444631	0.292026
ENST00000259457.8-1-7_54	PSMB7	-0.269697	0.206087
ENST00000259457.8-4-7_213	PSMB7	-0.573468	0.442605
ENST00000259457.8-3-7_49	PSMB7	0.218032	0.433568
ENST00000259457.8-1-7_21	PSMB7	0.466245	0.182125
ENST00000259457.8-7-7_408	PSMB7	0.255287	0.334297
ENST00000259457.8-3-7_20	PSMB7	0.232259	0.678564
ENST00000259457.8-7-7_366	PSMB7	-0.232852	0.182055
ENST00000259512.9-7-7_2	DERL1	-0.610789	0.271317
ENST00000259512.9-7-7_183	DERL1	0.0535141	0.375777
ENST00000259512.9-7-7_93	DERL1	0.178402	0.487747
ENST00000259512.9-6-7_52	DERL1	-0.0683884	0.571737
ENST00000259512.9-6-7_48	DERL1	-0.393811	0.123907
ENST00000259512.9-7-7_211	DERL1	-0.11111	0.1157
ENST00000259512.9-6-7_97	DERL1	0.383385	0.331417
ENST00000259605.11-10-11_39	RNF38	-0.255044	0.162623
ENST00000259605.11-3-11_51	RNF38	0.625452	0.266898
ENST00000259605.11-3-11_68	RNF38	0.0491762	0.524091
ENST00000259605.11-3-11_183	RNF38	-0.296083	0.130635
ENST00000259605.11-8-11_42	RNF38	-0.304417	0.24332
ENST00000259605.11-3-11_20	RNF38	-0.437629	0.425
ENST00000259605.11-10-11_25	RNF38	0.111065	0.544754
ENST00000259605.11-8-11_22	RNF38	-0.227772	0.121124
ENST00000259939.4-4-6_75	RNF144B	0.157537	0.28375
ENST00000259963.4-4-4_19	FAM8A1	-0.439759	0.609226
ENST00000259963.4-4-4_10	FAM8A1	0.851815	0.205196
ENST00000259963.4-4-4_81	FAM8A1	0.282936	0.268475
ENST00000259963.4-2-4_48	FAM8A1	-0.561931	0.33666
ENST00000259963.4-2-4_29	FAM8A1	0.206477	0.657766
ENST00000259963.4-4-4_34	FAM8A1	0.173748	0.633143
ENST00000259963.4-4-4_42	FAM8A1	0.0964615	0.397137
ENST00000259963.4-2-4_124	FAM8A1	-0.192795	0.124965
ENST00000260247.10-4-7_423	DCUN1D5	-0.0524787	0.651098
ENST00000260247.10-1-7_15	DCUN1D5	-0.045585	0.673018
ENST00000260247.10-1-7_69	DCUN1D5	0.0350987	0.578539
ENST00000260247.10-1-7_96	DCUN1D5	-0.0593117	0.609414
ENST00000260947.9-6-10_256	BARD1	-0.409577	0.363087
ENST00000260947.9-6-10_763	BARD1	0.455512	0.24026
ENST00000260947.9-2-10_248	BARD1	-0.10262	0.616079
ENST00000260947.9-1-10_694	BARD1	0.336486	0.326313
ENST00000260947.9-2-10_179	BARD1	-0.25843	0.223631
ENST00000260947.9-1-10_178	BARD1	-0.114112	0.253415
ENST00000260947.9-2-10_137	BARD1	0.584389	0.483504
ENST00000260947.9-1-10_581	BARD1	-0.0708341	0.265945
ENST00000260970.8-8-11_26	PPIG	-0.402028	0.258874
ENST00000260970.8-9-11_4	PPIG	0.17893	0.134261
ENST00000260970.8-8-11_6	PPIG	0.125419	0.661553
ENST00000260970.8-5-11_105	PPIG	0.242031	0.55543
ENST00000260970.8-9-11_2	PPIG	0.451576	0.225443
ENST00000260970.8-9-11_19	PPIG	-0.605918	0.397736
ENST00000260970.8-8-11_35	PPIG	-0.162162	0.132516
ENST00000260970.8-11-11_1	PPIG	0.449164	0.446927
ENST00000261303.13-8-10_20	PSMC1	-0.22454	0.120677
ENST00000261303.13-8-10_3	PSMC1	-0.10125	0.591292
ENST00000261303.13-8-10_38	PSMC1	0.0495954	0.714455
ENST00000261427.10-4-6_626	UBE2K	0.190129	0.559819
ENST00000261464.10-1-9_32	TRAF5	0.178529	0.529983
ENST00000261464.10-1-9_93	TRAF5	0.101569	0.375534
ENST00000261479.9-6-6_32	PSMA6	0.084427	0.420215
ENST00000261479.9-6-6_9	PSMA6	0.0794359	0.674701
ENST00000261479.9-6-6_89	PSMA6	-0.11387	0.344246
ENST00000261497.9-11-12_18	USP22	0.176738	0.183415
ENST00000261497.9-11-12_76	USP22	-0.306958	0.378238
ENST00000261497.9-8-12_64	USP22	-0.14028	0.204465
ENST00000261497.9-12-12_121	USP22	-0.070744	0.429948
ENST00000261497.9-12-12_126	USP22	-0.539477	0.166872
ENST00000261497.9-12-12_56	USP22	-0.193468	0.325063
ENST00000261497.9-7-12_198	USP22	-0.583855	0.48307
ENST00000261497.9-10-12_155	USP22	0.0525757	0.636784
ENST00000261497.9-8-12_163	USP22	0.26191	0.383382
ENST00000261497.9-7-12_149	USP22	-0.169784	0.383905
ENST00000261497.9-8-12_110	USP22	0.139515	0.485931
ENST00000261497.9-10-12_50	USP22	0.0274344	0.689787
ENST00000261497.9-10-12_7	USP22	0.125806	0.428895
ENST00000261497.9-7-12_103	USP22	-0.344902	0.424183
ENST00000261537.7-16-20_82	MIB1	0.483685	0.326619
ENST00000261537.7-6-20_124	MIB1	0.574583	0.15507
ENST00000261537.7-12-20_545	MIB1	0.443688	0.208754
ENST00000261537.7-6-20_121	MIB1	0.285623	0.305184
ENST00000261537.7-12-20_312	MIB1	-0.0940173	0.351276
ENST00000261537.7-6-20_223	MIB1	0.0957557	0.35289
ENST00000261537.7-16-20_76	MIB1	-0.0663428	0.577776
ENST00000261537.7-2-20_105	MIB1	0.326134	0.510434
ENST00000261537.7-6-20_196	MIB1	-0.245595	0.206291
ENST00000261537.7-16-20_3	MIB1	-0.103554	0.41784
ENST00000261537.7-16-20_56	MIB1	-0.0499249	0.551102
ENST00000261537.7-12-20_649	MIB1	0.124216	0.494851
ENST00000261593.8-4-6_9	RNF138	-0.162945	0.460438
ENST00000261593.8-4-6_19	RNF138	-0.122082	0.539504
ENST00000261593.8-1-6_139	RNF138	-0.706665	0.144114
ENST00000261593.8-1-6_390	RNF138	-0.282474	0.198171
ENST00000261593.8-3-6_146	RNF138	-0.94996	0.256713
ENST00000261593.8-3-6_169	RNF138	0.0875772	0.596619
ENST00000261593.8-1-6_125	RNF138	0.160051	0.234754
ENST00000261593.8-1-6_468	RNF138	0.84246	0.13674
ENST00000261593.8-4-6_12	RNF138	0.337714	0.664713
ENST00000261593.8-1-6_607	RNF138	-0.0975804	0.253403
ENST00000261593.8-4-6_37	RNF138	0.049949	0.441825
ENST00000261593.8-3-6_327	RNF138	-0.539734	0.527152
ENST00000261712.8-7-13_18	PSMD11	-0.622115	0.33824
ENST00000261714.11-9-11_16	BLMH	0.164225	0.699334
ENST00000261714.11-9-11_61	BLMH	0.0663319	0.458928
ENST00000261714.11-9-11_13	BLMH	0.548908	0.506704
ENST00000261721.9-5-7_60	BTBD1	-0.401092	0.542086
ENST00000261721.9-5-7_224	BTBD1	-0.508641	0.523533
ENST00000261721.9-5-7_340	BTBD1	0.247698	0.525864
ENST00000261721.9-1-7_367	BTBD1	0.335775	0.12559
ENST00000261721.9-1-7_179	BTBD1	-0.499158	0.350129
ENST00000261721.9-1-7_158	BTBD1	-0.108979	0.389551
ENST00000261721.9-5-7_131	BTBD1	0.702866	0.426165
ENST00000261758.6-2-2_48	MESD	0.276281	0.115117
ENST00000261758.6-2-2_63	MESD	0.916582	0.265433
ENST00000261758.6-2-2_98	MESD	-0.191794	0.209669
ENST00000261789.9-4-4_76	TM9SF1	0.160631	0.695495
ENST00000261789.9-4-4_25	TM9SF1	0.24624	0.191902
ENST00000261813.9-2-3_803	PFDN1	0.0592645	0.453543
ENST00000261813.9-2-3_262	PFDN1	-0.377241	0.156501
ENST00000261813.9-2-3_733	PFDN1	0.16043	0.346571
ENST00000261819.8-7-16_240	ANAPC5	-0.742461	0.168074
ENST00000261819.8-2-16_12	ANAPC5	0.097371	0.623176
ENST00000261819.8-10-16_88	ANAPC5	-0.202122	0.47316
ENST00000261819.8-13-16_16	ANAPC5	-0.106505	0.135628
ENST00000261819.8-7-16_44	ANAPC5	-0.186194	0.441866
ENST00000261819.8-10-16_71	ANAPC5	0.056869	0.372646
ENST00000261819.8-13-16_4	ANAPC5	-0.126272	0.223125
ENST00000261819.8-7-16_59	ANAPC5	0.13386	0.278335
ENST00000261819.8-7-16_231	ANAPC5	0.102296	0.549657
ENST00000261819.8-2-16_17	ANAPC5	-0.0989131	0.638176
ENST00000261819.8-7-16_99	ANAPC5	0.169265	0.580492
ENST00000261819.8-4-16_93	ANAPC5	-0.0360732	0.638607
ENST00000261819.8-10-16_10	ANAPC5	0.149855	0.328035
ENST00000261819.8-4-16_228	ANAPC5	0.0856835	0.280088
ENST00000261819.8-4-16_142	ANAPC5	-0.16275	0.678171
ENST00000261837.12-5-11_208	GNB5	0.463801	0.345645
ENST00000261837.12-8-11_72	GNB5	-0.17336	0.539223
ENST00000261837.12-8-11_325	GNB5	-0.313964	0.351538
ENST00000261837.12-8-11_195	GNB5	0.0372754	0.600062
ENST00000261837.12-5-11_385	GNB5	-0.123941	0.426565
ENST00000262033.11-1-7_329	PTGES3	0.335103	0.473455
ENST00000262033.11-1-7_381	PTGES3	-0.119438	0.519083
ENST00000262039.9-13-24_258	PIK3C3	-0.469637	0.299929
ENST00000262039.9-3-24_8	PIK3C3	-0.243357	0.436734
ENST00000262039.9-1-24_175	PIK3C3	-0.406024	0.489813
ENST00000262039.9-13-24_37	PIK3C3	0.0525372	0.627038
ENST00000262039.9-1-24_60	PIK3C3	-0.0925029	0.388331
ENST00000262039.9-22-24_9	PIK3C3	0.211479	0.632405
ENST00000262039.9-3-24_350	PIK3C3	-0.7608	0.342517
ENST00000262039.9-11-24_64	PIK3C3	-0.304529	0.333239
ENST00000262039.9-11-24_80	PIK3C3	0.0469961	0.663508
ENST00000262039.9-2-24_24	PIK3C3	-0.276531	0.515656
ENST00000262039.9-11-24_1	PIK3C3	-0.0729954	0.677813
ENST00000262039.9-3-24_142	PIK3C3	-0.873833	0.292639
ENST00000262039.9-13-24_125	PIK3C3	0.219465	0.510942
ENST00000262039.9-22-24_91	PIK3C3	0.388001	0.6088
ENST00000262039.9-2-24_186	PIK3C3	-0.25721	0.636471
ENST00000262039.9-22-24_189	PIK3C3	0.0382606	0.695954
ENST00000262139.10-9-12_25	WIPI1	0.184579	0.652281
ENST00000262139.10-8-12_48	WIPI1	-0.22018	0.405678
ENST00000262139.10-7-12_44	WIPI1	0.420742	0.386559
ENST00000262139.10-1-12_291	WIPI1	0.0876967	0.494382
ENST00000262139.10-10-12_3	WIPI1	0.0488921	0.712739
ENST00000262139.10-7-12_26	WIPI1	-0.62563	0.181605
ENST00000262139.10-9-12_60	WIPI1	-0.304677	0.606669
ENST00000262139.10-1-12_63	WIPI1	-0.407012	0.141757
ENST00000262139.10-8-12_266	WIPI1	-0.351978	0.432054
ENST00000262139.10-7-12_6	WIPI1	-0.303623	0.467764
ENST00000262139.10-9-12_47	WIPI1	0.0758481	0.714884
ENST00000262139.10-10-12_90	WIPI1	0.190315	0.613127
ENST00000262139.10-7-12_70	WIPI1	-0.0935939	0.654107
ENST00000262177.9-6-8_21	DNAJB6	0.06172	0.541293
ENST00000262177.9-1-8_178	DNAJB6	0.288086	0.412076
ENST00000262177.9-1-8_101	DNAJB6	-0.0617424	0.534532
ENST00000262177.9-6-8_1	DNAJB6	0.644598	0.228153
ENST00000262177.9-1-8_58	DNAJB6	0.761149	0.176423
ENST00000262193.7-2-5_34	PSMB1	-1.22958	0.156874
ENST00000262193.7-1-5_222	PSMB1	0.0733658	0.641582
ENST00000262193.7-1-5_198	PSMB1	0.094092	0.420544
ENST00000262291.9-2-10_37	VMP1	0.171438	0.310501
ENST00000262291.9-9-10_418	VMP1	-0.178288	0.673837
ENST00000262291.9-2-10_1	VMP1	-0.66959	0.157608
ENST00000262294.12-4-23_106	TRIM37	0.140308	0.172449
ENST00000262294.12-13-23_149	TRIM37	-0.115426	0.325383
ENST00000262294.12-9-23_54	TRIM37	0.151883	0.626927
ENST00000262294.12-3-23_52	TRIM37	-0.345648	0.173883
ENST00000262294.12-9-23_264	TRIM37	0.666838	0.388197
ENST00000262294.12-10-23_71	TRIM37	0.0657004	0.475122
ENST00000262294.12-16-23_167	TRIM37	-0.190799	0.360785
ENST00000262294.12-13-23_39	TRIM37	-0.0578035	0.64137
ENST00000262294.12-21-23_74	TRIM37	-0.353469	0.650788
ENST00000262294.12-4-23_11	TRIM37	0.0403472	0.590166
ENST00000262294.12-4-23_145	TRIM37	-0.403165	0.213592
ENST00000262294.12-3-23_69	TRIM37	0.0509876	0.654497
ENST00000262294.12-3-23_21	TRIM37	0.148595	0.441883
ENST00000262294.12-13-23_163	TRIM37	0.196363	0.708939
ENST00000262294.12-21-23_28	TRIM37	0.0614873	0.402374
ENST00000262294.12-21-23_2	TRIM37	-0.0558284	0.512597
ENST00000262294.12-3-23_11	TRIM37	0.0824214	0.527158
ENST00000262294.12-9-23_48	TRIM37	0.500423	0.130536
ENST00000262294.12-16-23_74	TRIM37	0.557662	0.157273
ENST00000262294.12-9-23_215	TRIM37	-0.225529	0.296064
ENST00000262294.12-3-23_16	TRIM37	-0.453802	0.178764
ENST00000262294.12-10-23_51	TRIM37	-0.106144	0.44111
ENST00000262294.12-13-23_81	TRIM37	-0.346832	0.591489
ENST00000262294.12-12-23_65	TRIM37	0.845537	0.142861
ENST00000262294.12-12-23_89	TRIM37	0.110694	0.561942
ENST00000262370.12-13-16_77	MGRN1	0.129976	0.520377
ENST00000262370.12-13-16_40	MGRN1	0.207137	0.176865
ENST00000262370.12-13-16_118	MGRN1	0.0513046	0.678753
ENST00000262370.12-3-16_77	MGRN1	-0.0815452	0.502077
ENST00000262370.12-4-16_178	MGRN1	-0.214219	0.491098
ENST00000262370.12-4-16_18	MGRN1	-0.163562	0.243125
ENST00000262370.12-3-16_27	MGRN1	-0.0841786	0.567464
ENST00000262370.12-13-16_109	MGRN1	0.0931667	0.217847
ENST00000262394.7-2-8_6	WSB1	0.39151	0.219819
ENST00000262394.7-2-8_21	WSB1	0.550982	0.417324
ENST00000262394.7-2-8_25	WSB1	0.15474	0.670949
ENST00000262394.7-6-8_1	WSB1	-0.194715	0.302571
ENST00000262394.7-7-8_57	WSB1	-0.868105	0.245964
ENST00000262394.7-6-8_7	WSB1	-0.121427	0.500897
ENST00000262394.7-7-8_43	WSB1	-0.134737	0.608293
ENST00000262394.7-8-8_2	WSB1	0.548903	0.219981
ENST00000262394.7-8-8_26	WSB1	0.133424	0.187632
ENST00000262394.7-7-8_36	WSB1	-0.308255	0.449787
ENST00000262394.7-6-8_23	WSB1	0.185575	0.129647
ENST00000262394.7-7-8_63	WSB1	0.104222	0.441003
ENST00000262406.10-18-18_5	RGS9	-0.324759	0.33395
ENST00000262406.10-16-18_64	RGS9	0.107026	0.589666
ENST00000262406.10-14-18_173	RGS9	-0.197531	0.561841
ENST00000262406.10-16-18_188	RGS9	-0.137698	0.533459
ENST00000262406.10-14-18_40	RGS9	-0.441227	0.4901
ENST00000262406.10-16-18_171	RGS9	0.118776	0.697327
ENST00000262406.10-7-18_314	RGS9	-0.0422524	0.688399
ENST00000262406.10-12-18_249	RGS9	-0.604864	0.437641
ENST00000262406.10-14-18_273	RGS9	-0.938908	0.226666
ENST00000262406.10-18-18_89	RGS9	-0.257493	0.570744
ENST00000262406.10-7-18_367	RGS9	0.332973	0.237438
ENST00000262406.10-16-18_119	RGS9	0.606312	0.274669
ENST00000262406.10-7-18_464	RGS9	0.146222	0.369233
ENST00000262406.10-18-18_84	RGS9	-0.306661	0.419031
ENST00000262406.10-7-18_474	RGS9	-0.233603	0.639682
ENST00000262406.10-14-18_20	RGS9	0.179028	0.173899
ENST00000262435.14-10-18_325	SMURF2	-0.0913857	0.615981
ENST00000262435.14-3-18_62	SMURF2	0.378831	0.248557
ENST00000262435.14-18-18_2	SMURF2	0.152395	0.317246
ENST00000262435.14-10-18_165	SMURF2	-0.295168	0.439076
ENST00000262435.14-18-18_15	SMURF2	0.065338	0.450231
ENST00000262435.14-15-18_104	SMURF2	-0.159725	0.669202
ENST00000262435.14-14-18_17	SMURF2	-1.03091	0.235233
ENST00000262435.14-7-18_83	SMURF2	-0.106242	0.414999
ENST00000262435.14-10-18_13	SMURF2	0.147053	0.596099
ENST00000262435.14-6-18_7	SMURF2	-0.805149	0.35206
ENST00000262435.14-12-18_84	SMURF2	-0.48533	0.297828
ENST00000262435.14-7-18_4	SMURF2	0.11672	0.558301
ENST00000262435.14-12-18_26	SMURF2	0.168059	0.578508
ENST00000262435.14-10-18_212	SMURF2	-0.19568	0.704378
ENST00000262435.14-12-18_73	SMURF2	-0.31398	0.291762
ENST00000262435.14-6-18_32	SMURF2	-0.472582	0.245204
ENST00000262435.14-12-18_10	SMURF2	0.854753	0.274277
ENST00000262435.14-15-18_118	SMURF2	-0.319727	0.274695
ENST00000262435.14-9-18_132	SMURF2	-0.0887728	0.65209
ENST00000262435.14-6-18_43	SMURF2	-0.143661	0.429339
ENST00000262435.14-15-18_86	SMURF2	0.113167	0.447985
ENST00000262455.7-6-11_16	ERP44	0.15986	0.229677
ENST00000262455.7-10-11_7	ERP44	-0.0522348	0.620741
ENST00000262455.7-6-11_69	ERP44	0.100529	0.692904
ENST00000262455.7-3-11_26	ERP44	0.0826383	0.424341
ENST00000262455.7-10-11_370	ERP44	0.160435	0.482571
ENST00000262455.7-6-11_129	ERP44	-0.111092	0.291722
ENST00000262455.7-10-11_301	ERP44	0.554073	0.45305
ENST00000262455.7-6-11_83	ERP44	0.37561	0.511645
ENST00000262455.7-6-11_32	ERP44	0.328996	0.324113
ENST00000262493.12-2-7_760	GNAO1	0.294733	0.191217
ENST00000262493.12-5-7_15	GNAO1	-0.249644	0.41105
ENST00000262493.12-4-7_119	GNAO1	-0.225181	0.283396
ENST00000262493.12-4-7_912	GNAO1	-0.0900427	0.533466
ENST00000262493.12-5-7_227	GNAO1	-0.160061	0.280025
ENST00000262493.12-2-7_7920	GNAO1	-0.0905672	0.471776
ENST00000262493.12-2-7_307	GNAO1	0.11054	0.69518
ENST00000262493.12-4-7_111	GNAO1	-0.124046	0.714195
ENST00000262506.8-1-10_83	CSNK2A2	0.111492	0.427614
ENST00000262506.8-9-10_8	CSNK2A2	-0.14374	0.58185
ENST00000262506.8-1-10_10	CSNK2A2	0.0583854	0.705507
ENST00000262506.8-9-10_3	CSNK2A2	0.166267	0.221895
ENST00000262820.7-1-6_812	KLHL13	0.17987	0.500579
ENST00000262820.7-1-6_105	KLHL13	-0.114237	0.659363
ENST00000262843.11-5-9_451	MID2	0.130521	0.146836
ENST00000262843.11-9-9_4	MID2	0.113306	0.215415
ENST00000262843.11-9-9_17	MID2	-0.318895	0.205589
ENST00000262843.11-5-9_277	MID2	-0.530651	0.513883
ENST00000262854.11-76-80_15	HUWE1	0.0707945	0.393309
ENST00000262854.11-28-80_20	HUWE1	0.542656	0.0967456
ENST00000262854.11-35-80_6	HUWE1	0.154962	0.641796
ENST00000262854.11-63-80_110	HUWE1	-0.126315	0.706083
ENST00000262854.11-20-80_293	HUWE1	-0.359171	0.236383
ENST00000262854.11-45-80_42	HUWE1	-0.41715	0.093195
ENST00000262854.11-80-80_33	HUWE1	0.144237	0.106513
ENST00000262854.11-75-80_26	HUWE1	0.537824	0.166295
ENST00000262854.11-46-80_89	HUWE1	0.276006	0.379212
ENST00000262854.11-28-80_16	HUWE1	-0.086277	0.446994
ENST00000262854.11-27-80_20	HUWE1	-0.834556	0.0969719
ENST00000262903.9-22-23_204	HACE1	0.567555	0.456092
ENST00000262903.9-23-23_30	HACE1	-0.0803248	0.512218
ENST00000262903.9-23-23_10	HACE1	0.421009	0.510152
ENST00000262903.9-2-23_43	HACE1	-0.317131	0.186781
ENST00000262903.9-22-23_128	HACE1	-0.441827	0.108746
ENST00000262903.9-10-23_31	HACE1	0.532919	0.108156
ENST00000262903.9-3-23_37	HACE1	0.257386	0.677074
ENST00000262903.9-7-23_128	HACE1	0.24676	0.702443
ENST00000262903.9-13-23_4	HACE1	-0.30827	0.715517
ENST00000262903.9-12-23_8	HACE1	-0.105444	0.449432
ENST00000262903.9-2-23_31	HACE1	0.401366	0.62427
ENST00000262903.9-12-23_3	HACE1	-0.15648	0.474176
ENST00000262903.9-22-23_146	HACE1	0.529512	0.524936
ENST00000262903.9-4-23_183	HACE1	-0.131742	0.379424
ENST00000262903.9-10-23_174	HACE1	0.580017	0.220982
ENST00000262903.9-4-23_228	HACE1	0.549522	0.151198
ENST00000262903.9-22-23_3	HACE1	0.357137	0.501408
ENST00000262903.9-4-23_85	HACE1	0.114525	0.652624
ENST00000262903.9-10-23_144	HACE1	0.124159	0.139487
ENST00000262903.9-23-23_15	HACE1	-0.0563915	0.679904
ENST00000262903.9-10-23_100	HACE1	0.178794	0.572515
ENST00000262903.9-2-23_24	HACE1	0.62971	0.129781
ENST00000263228.4-4-4_34	UBE2R2	0.0689251	0.703095
ENST00000263228.4-3-4_253	UBE2R2	-0.251118	0.348464
ENST00000263228.4-3-4_529	UBE2R2	-0.510399	0.146449
ENST00000263228.4-4-4_75	UBE2R2	0.0313164	0.691272
ENST00000263228.4-3-4_453	UBE2R2	0.421118	0.559201
ENST00000263228.4-4-4_243	UBE2R2	0.0943907	0.479589
ENST00000263228.4-4-4_258	UBE2R2	-0.0740353	0.693694
ENST00000263464.9-2-7_11	BIRC3	1.16674	0.104428
ENST00000263464.9-2-7_92	BIRC3	0.204633	0.585324
ENST00000263464.9-2-7_97	BIRC3	-0.497992	0.439743
ENST00000263464.9-2-7_69	BIRC3	0.223248	0.451446
ENST00000263634.8-7-8_22	ASB3	-1.44268	0.10386
ENST00000263634.8-5-8_52	ASB3	-0.173892	0.292959
ENST00000263634.8-5-8_58	ASB3	-0.251229	0.463511
ENST00000263634.8-6-8_169	ASB3	0.635537	0.336577
ENST00000263634.8-5-8_98	ASB3	0.0477248	0.470398
ENST00000263634.8-5-8_10	ASB3	0.126148	0.715922
ENST00000263634.8-7-8_97	ASB3	-0.47172	0.213257
ENST00000263634.8-6-8_120	ASB3	-0.248358	0.665561
ENST00000263634.8-6-8_454	ASB3	-0.69466	0.289033
ENST00000263666.9-4-9_219	PDZRN3	0.0521842	0.680562
ENST00000263666.9-4-9_125	PDZRN3	-0.331929	0.34352
ENST00000263666.9-4-9_12	PDZRN3	0.216021	0.663908
ENST00000263734.5-1-15_863	EPAS1	0.0951637	0.558135
ENST00000263734.5-8-15_63	EPAS1	0.855178	0.290779
ENST00000263734.5-6-15_292	EPAS1	0.526937	0.495271
ENST00000263904.5-13-13_47	STAM2	0.0589245	0.607821
ENST00000263904.5-13-13_7	STAM2	0.237134	0.442629
ENST00000263904.5-11-13_138	STAM2	0.0317399	0.715769
ENST00000263904.5-7-13_174	STAM2	0.205065	0.677641
ENST00000263904.5-13-13_57	STAM2	0.280439	0.226732
ENST00000263904.5-2-13_27	STAM2	-0.413285	0.481305
ENST00000263904.5-13-13_92	STAM2	0.277138	0.182374
ENST00000263904.5-7-13_59	STAM2	0.354158	0.12892
ENST00000263904.5-2-13_17	STAM2	0.21739	0.259704
ENST00000263904.5-2-13_22	STAM2	-0.171774	0.315417
ENST00000263904.5-7-13_78	STAM2	-0.193271	0.365338
ENST00000263904.5-11-13_61	STAM2	-0.0837088	0.465745
ENST00000263904.5-11-13_216	STAM2	0.655382	0.0990125
ENST00000263904.5-7-13_211	STAM2	0.79112	0.11862
ENST00000263925.8-8-9_286	LNX1	0.231352	0.536208
ENST00000263925.8-1-9_1551	LNX1	-0.873808	0.283203
ENST00000263925.8-8-9_344	LNX1	-0.189726	0.180969
ENST00000263966.8-5-20_86	USP13	-0.620677	0.151168
ENST00000263966.8-13-20_453	USP13	0.227104	0.483364
ENST00000263966.8-20-20_13	USP13	0.392743	0.566459
ENST00000263966.8-13-20_394	USP13	0.0440141	0.705447
ENST00000263966.8-13-20_379	USP13	-0.0547464	0.399177
ENST00000263966.8-20-20_76	USP13	0.351282	0.571874
ENST00000263966.8-9-20_8	USP13	-0.348842	0.633716
ENST00000263966.8-8-20_347	USP13	0.391009	0.25627
ENST00000263966.8-5-20_30	USP13	-0.179874	0.39329
ENST00000264033.6-13-15_6	CBL	-0.181804	0.492046
ENST00000264033.6-2-15_1112	CBL	-0.786812	0.347206
ENST00000264033.6-12-15_315	CBL	0.0563907	0.609898
ENST00000264033.6-3-15_33	CBL	-0.342861	0.28634
ENST00000264033.6-6-15_50	CBL	0.0982698	0.262989
ENST00000264033.6-3-15_26	CBL	-0.197927	0.675055
ENST00000264033.6-12-15_40	CBL	0.0963478	0.621442
ENST00000264033.6-5-15_20	CBL	-0.173011	0.368262
ENST00000264033.6-6-15_69	CBL	-0.315789	0.358383
ENST00000264033.6-12-15_332	CBL	0.512504	0.334416
ENST00000264033.6-12-15_223	CBL	0.490083	0.56737
ENST00000264033.6-2-15_350	CBL	-0.071432	0.251837
ENST00000264033.6-6-15_28	CBL	-0.0762205	0.32195
ENST00000264033.6-2-15_1437	CBL	0.369281	0.291244
ENST00000264065.12-17-21_28	DNAJC10	0.428221	0.153196
ENST00000264065.12-18-21_2	DNAJC10	0.159685	0.238101
ENST00000264065.12-17-21_47	DNAJC10	-0.348085	0.173688
ENST00000264065.12-17-21_43	DNAJC10	-0.28271	0.433986
ENST00000264079.11-5-13_20	MCOLN1	-0.0693835	0.446538
ENST00000264079.11-5-13_46	MCOLN1	-0.220306	0.655332
ENST00000264198.5-3-3_49	MUL1	0.113684	0.458497
ENST00000264198.5-3-3_44	MUL1	0.0466515	0.569646
ENST00000264254.11-3-5_17	PDCL3	0.295885	0.695354
ENST00000264254.11-4-5_27	PDCL3	0.1646	0.193438
ENST00000264254.11-4-5_38	PDCL3	1.2318	0.104727
ENST00000264254.11-4-5_20	PDCL3	0.226204	0.577278
ENST00000264254.11-3-5_4	PDCL3	-0.0914259	0.318949
ENST00000264346.12-10-22_142	HERC6	-0.124464	0.26902
ENST00000264346.12-18-22_28	HERC6	-0.438323	0.187914
ENST00000264346.12-18-22_14	HERC6	-0.498674	0.268956
ENST00000264346.12-2-22_57	HERC6	0.157518	0.420604
ENST00000264346.12-20-22_65	HERC6	-0.442147	0.182425
ENST00000264346.12-6-22_18	HERC6	-0.508171	0.436049
ENST00000264346.12-20-22_90	HERC6	-0.488407	0.529691
ENST00000264346.12-10-22_97	HERC6	1.25994	0.116476
ENST00000264346.12-9-22_29	HERC6	-0.809111	0.153465
ENST00000264350.8-6-22_177	HERC5	0.1678	0.580108
ENST00000264350.8-6-22_39	HERC5	-0.255785	0.284122
ENST00000264350.8-2-22_6	HERC5	0.0640945	0.440518
ENST00000264350.8-18-22_15	HERC5	0.668065	0.274408
ENST00000264350.8-18-22_319	HERC5	0.383561	0.225726
ENST00000264350.8-10-22_6	HERC5	-1.16946	0.149496
ENST00000264350.8-9-22_12	HERC5	-0.118418	0.572616
ENST00000264350.8-9-22_17	HERC5	-0.0846479	0.405844
ENST00000264350.8-20-22_38	HERC5	0.286742	0.320514
ENST00000264350.8-6-22_27	HERC5	0.328395	0.282347
ENST00000264350.8-2-22_24	HERC5	0.0919641	0.423672
ENST00000264350.8-20-22_113	HERC5	-0.257872	0.141682
ENST00000264350.8-6-22_59	HERC5	0.179571	0.215123
ENST00000264350.8-6-22_61	HERC5	0.338588	0.170137
ENST00000264350.8-18-22_272	HERC5	0.0624506	0.480685
ENST00000264350.8-2-22_17	HERC5	0.348866	0.563231
ENST00000264414.9-4-15_7	CUL3	-0.106833	0.166216
ENST00000264414.9-4-15_19	CUL3	1.27803	0.134066
ENST00000264414.9-11-15_114	CUL3	0.0563373	0.597333
ENST00000264414.9-4-15_36	CUL3	0.160119	0.292103
ENST00000264414.9-11-15_53	CUL3	-0.187353	0.32861
ENST00000264607.9-3-4_128	ASB1	0.0676256	0.627683
ENST00000264607.9-2-4_189	ASB1	-0.104738	0.374401
ENST00000264607.9-2-4_128	ASB1	-0.252374	0.206129
ENST00000264607.9-2-4_54	ASB1	0.106911	0.316166
ENST00000264607.9-3-4_283	ASB1	-0.142423	0.580214
ENST00000264607.9-3-4_506	ASB1	0.326644	0.323632
ENST00000264639.9-4-11_110	PSMD3	-0.277108	0.268826
ENST00000264639.9-4-11_3	PSMD3	-0.0573645	0.664881
ENST00000264658.11-10-14_81	FBXL20	-0.324537	0.425954
ENST00000264658.11-2-14_520	FBXL20	0.310693	0.376149
ENST00000264658.11-5-14_32	FBXL20	-0.139208	0.680591
ENST00000264658.11-6-14_142	FBXL20	0.196355	0.600638
ENST00000264658.11-5-14_20	FBXL20	0.194666	0.264407
ENST00000264658.11-7-14_12	FBXL20	-0.516857	0.498488
ENST00000264658.11-2-14_724	FBXL20	-0.785995	0.266015
ENST00000264658.11-2-14_503	FBXL20	-0.061958	0.608148
ENST00000264658.11-7-14_26	FBXL20	-0.161507	0.48657
ENST00000264658.11-2-14_123	FBXL20	0.40646	0.115677
ENST00000264658.11-6-14_7	FBXL20	-0.106056	0.655531
ENST00000264867.7-11-12_17	PPARGC1A	-0.308073	0.643764
ENST00000264867.7-6-12_7	PPARGC1A	-0.448113	0.490553
ENST00000264867.7-8-12_9	PPARGC1A	0.422256	0.515586
ENST00000264867.7-11-12_10	PPARGC1A	-0.335172	0.627666
ENST00000264914.10-5-7_277	ARSB	0.492243	0.379619
ENST00000264914.10-5-7_1414	ARSB	0.252559	0.690316
ENST00000264914.10-5-7_1073	ARSB	-0.110959	0.481104
ENST00000264914.10-5-7_1241	ARSB	0.815905	0.259952
ENST00000264926.7-6-12_261	RAD18	-0.364834	0.516932
ENST00000264926.7-12-12_43	RAD18	0.295253	0.679419
ENST00000264926.7-6-12_253	RAD18	0.278229	0.453792
ENST00000264926.7-12-12_403	RAD18	0.390512	0.13817
ENST00000264926.7-11-12_142	RAD18	0.352693	0.630881
ENST00000264926.7-11-12_70	RAD18	-0.0889763	0.695127
ENST00000264926.7-6-12_28	RAD18	-0.0892004	0.550067
ENST00000264926.7-4-12_112	RAD18	0.0766165	0.714786
ENST00000264933.9-1-5_29	PDCD6	0.189807	0.585782
ENST00000264933.9-1-5_23	PDCD6	-0.158907	0.679068
ENST00000264954.5-1-3_208	GRPEL1	0.962813	0.146367
ENST00000265062.8-1-4_106	RAB7A	-0.114523	0.112252
ENST00000265062.8-1-4_31	RAB7A	-0.097265	0.440896
ENST00000265062.8-1-4_128	RAB7A	0.206319	0.296732
ENST00000265062.8-1-4_156	RAB7A	-0.0609108	0.501006
ENST00000265062.8-1-4_15	RAB7A	-0.498922	0.499096
ENST00000265260.8-4-4_49	PCNP	0.126825	0.67352
ENST00000265260.8-4-4_7	PCNP	-0.0879708	0.531321
[truncated: 6,936 more rows]

## Sheet: Table S3
Table S3. List of sgRNAs used for knockout of CTLH complex components.
Gene_replicate	sgRNA sequence
WDR26_KO1	CAGCCTGAATGTCAATAACG
WDR26_KO2	CCTCTTACCACAATAGCATG
WDR26_KO3	GACATCCTGACTCTTGCATG
RANBP9_KO1	ATGCGTGGCTCGAACTGACG
RANBP9_KO2	GGAAGCTAATTCTTCTAGAA
RANBP9_KO3	GTGAACATGAATAGACTACC
RMND5A_KO1	CCCACTGGTTTGCATCAAGT
RMND5A_KO2	GTGGAGCACTTCTTTCGACA
RMND5A_KO3	TGATTCTGACATTAGCAGTG
MAEA_KO1	ATAAGAGACTGGACGCTGTG
MAEA_KO2	CCAGGAGTACCCGACCCTCA
MAEA_KO3	CGCACGCCCTACCTTGTACG
